# Supplementary material for: Regioselective tandem sulfonylation/cyclization of unsaturated N-substituted enamides with sulfonyl chlorides by copper catalysis
Source: Royal Society of Chemistry journal article supplement (doi:10.1039/d4qo01132e), 2024-01-01

## Supporting Information

### Regioselective tandem sulfonylation/cyclization of unsaturated *N*-substituted enamides with sulfonyl chlorides by copper catalysis

Ran Ding,<sup>a, c\*</sup> Tao Wu,<sup>a†</sup> Tao Ma,<sup>a†</sup> Wen-Chao Ji,<sup>a</sup> Zi-Rong Li,<sup>a</sup> Hui Gao<sup>b\*</sup>

<sup>a</sup> College of Chemistry and Materials Engineering, Anhui Science and Technology University, Bengbu, Anhui, 233000, P. R. China.

<sup>b</sup> School of Chemistry and Materials Science, Huaibei Normal University, Huaibei, Anhui 235000, P. R. China

<sup>c</sup> Department of Chemistry, University of Science and Technology of China, Hefei, Anhui 230026, P. R. China

Corresponding author: dingran@mail.ustc.edu.cn; gaohui20032@163.com

Tao Wu,<sup>†</sup> Tao Ma,<sup>†</sup> contributed equally to this work.

### Table of Contents

|                                                                                       |     |
|---------------------------------------------------------------------------------------|-----|
| 1. General information .....                                                          | S2  |
| 2. Preparation of starting materials <b>1a-1u</b> .....                               | S3  |
| 3. Procedure for the synthesis of compound <b>3 or 4</b> .....                        | S3  |
| 4. Procedure for 1 Mmol-scale reaction for the preparation of product <b>3a</b> ..... | S4  |
| 5. Procedures for the formation of <b>3aa</b> .....                                   | S4  |
| 6. The analysis of radical trapping reaction residue.....                             | S5  |
| 7. X-ray diffraction analysis of compound <b>3r</b> .....                             | S8  |
| 8. Characterization Data of <b>3a – 3u, 4a – 4l</b> .....                             | S9  |
| 9. NMR spectra for the products .....                                                 | S25 |

## 1. General information

Unless otherwise noted, all reagents and solvents were purchased from commercial suppliers and used without further purification. Substituted acetophenone were purchased from Leyan Company and used directly.  $^1\text{H}$ -NMR and  $^{13}\text{C}$ -NMR spectra were recorded at 25 °C on Bruker Advance 600M spectrometers ( $\text{CDCl}_3$ , DMSO as solvent). Chemical shifts for  $^1\text{H}$  NMR spectra are reported as  $\delta$  in units of parts per million (ppm) downfield from  $\text{SiMe}_4$  ( $\delta$  0.0) and relative to the signal of  $\text{SiMe}_4$  ( $\delta$  0.00 singlet). Multiplicities were given as: s (singlet); d (doublet); t (triplet); q (quartet); dd (doublet of doublets); dt (doublet of triplets); m (multiplets) and *etc.* Coupling constants are reported as a  $J$  value in Hz.  $^{13}\text{C}$  NMR spectra are reported as  $\delta$  in units of parts per million (ppm) downfield from  $\text{SiMe}_4$  ( $\delta$  0.0) and relative to the signal of chloroform-d ( $\delta$  77.00 triplet). High resolution mass spectral analysis (HRMS) was performed on an Agilent Technologies 6540 UHD Accurate-Mass Q-TOF LC/MS (ESI) instrument. Flash chromatography was performed using 200-300 mesh silica gel with the indicated solvent system.

## 2. Preparation of starting materials 1a-1u

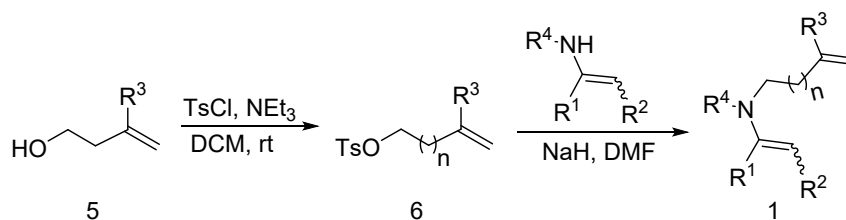

To a solution of hydroxylated alkenes **5** (30 mmol, 1.0 equiv), Et<sub>3</sub>N (33 mmol, 1.1 equiv) in dry CH<sub>2</sub>Cl<sub>2</sub> (50 mL) was added TsCl (33 mmol, 1.1 equiv) and the resulting mixture stirred at room temperature for 24 h. The reaction mixture was quenched with saturated NaHCO<sub>3</sub> (15 mL) and extracted with CH<sub>2</sub>Cl<sub>2</sub> (3 × 30 mL). The combined organic layers were dried by Na<sub>2</sub>SO<sub>4</sub>, filtered and concentrated in vacuo. Purification via column chromatography PE/EtOAc (9:1) to yield the title compound **6** as a colorless oil.

NaH (60% dispersion in mineral oil, 1.5 equiv) was added to the mixture of enamide (5.0 mmol, 1.0 equiv) and dry DMF (10 mL) at 0 °C. The resulting suspension was stirred at 0 °C for 30 min. 7.5 mmol (1.5 equiv) of compound **6** was then added drop wise and the solution was warmed to room temperature overnight. The completion of the reaction was confirmed by checking TLC. After finishing, the reaction was quenched by adding 2 mL of water at 0 °C. The organic layer was extracted with ethyl acetate through stages of extraction with water. The combined organic layer was concentrated under reduced pressure and the pure product was isolated by flash column chromatography (PE/EtOAc).

## 3. Procedure for the synthesis of compound 3 or 4.

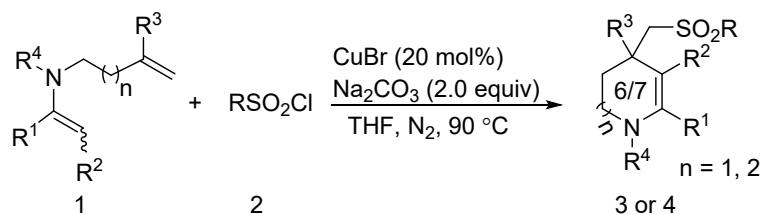

A dry 25-mL Schlenk tube containing a magnetic stirring bar was charged with unsaturated *N*-substituted enamides **1** (0.1 mmol), sulfonyl chlorides **2** (0.2 mmol), CuBr (20 mol%), Na<sub>2</sub>CO<sub>3</sub> (2.0 equiv), THF (1 mL), Then the mixture was charged with N<sub>2</sub> and heated at 90 °C oil bath for 20 h. After finishing, the reaction mixture was concentrated on a rotary evaporator and the residue was directly subjected to flash

column chromatography on silica gel with (20-30% EtOAc/Petroleum ether) as eluate to furnish the desired product.

#### 4. 1 Mmol-scale reaction for the preparation of product 3a

A mixture of dienes **1a** (1 mmol), 4-Methoxybenzenesulfonyl chloride **2a** (2.0 equiv), CuBr (20 mol%), Na<sub>2</sub>CO<sub>3</sub> (2.0 equiv), THF (5 mL), were charged with N<sub>2</sub> and heated at 90 °C oil bath for 20 h. After finishing, the reaction mixture was concentrated on a rotary evaporator and the residue was directly subjected to flash column chromatography on silica gel with (20-30% EtOAc/Petroleum ether) as eluate to furnish the desired product **3a** (78%).

#### 5. Procedures for the formation of 3aa.

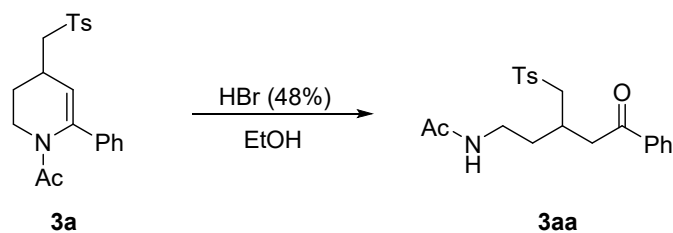

48% aqueous solution of HBr (1.0 mL) was added to the mixture of **3a** (0.3 mmol) and EtOH (4 mL) at 0 °C. After the reaction finished as indicated by TLC, the reaction mixture was quenched by addition of saturated aqueous NaHCO<sub>3</sub> at 0 °C and extracted with 10 mL dichloromethane for 3 times. The combined organic layers were washed with water, saturated brine, dried over CaCl<sub>2</sub>, concentrated in vacuo and purified by chromatography on silica gel with (30% EtOAc/Petroleum ether) as eluate to furnish the desired product **3aa**.

## 6. The radical trapping reaction residue was analyzed by high resolution mass spectrometry (HRMS)

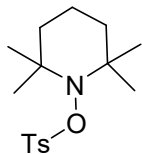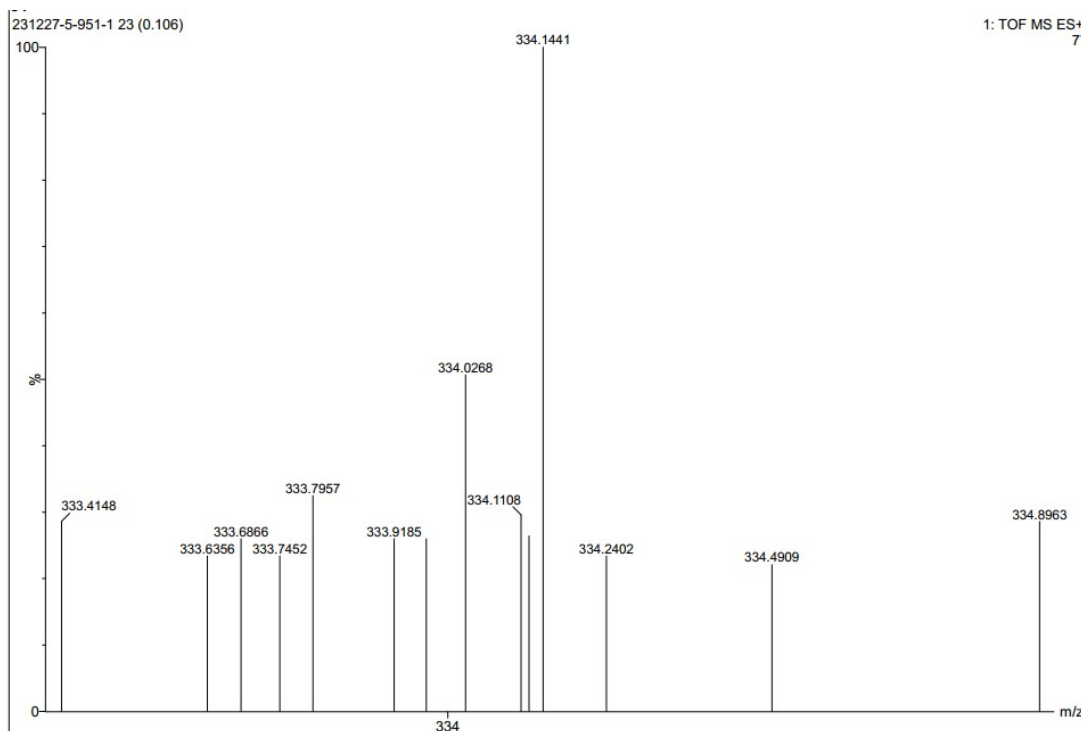

Monoisotopic Mass, Even Electron Ions  
 1905 formula(e) evaluated with 1 results within limits (up to 50 best isotopic matches for each mass)  
 Elements Used:  
 C: 16-16 H: 25-25 N: 0-20 O: 0-100 Na: 0-3 S: 1-4  
 31  
 231227-5-951-1 23 (0.106)

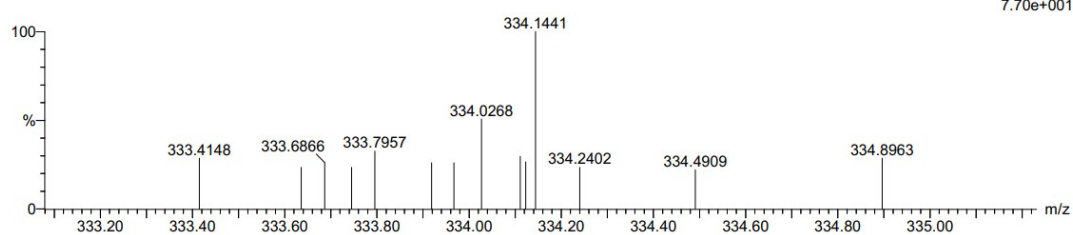

Minimum: -1.5  
 Maximum: 50.0

| Mass     | Calc. Mass | mDa  | PPM  | DBE | i-FIT | Norm | Conf (%) | Formula           |
|----------|------------|------|------|-----|-------|------|----------|-------------------|
| 334.1441 | 334.1453   | -1.2 | -3.6 | 4.5 | 34.6  | n/a  | n/a      | C16 H25 N O3 Na S |

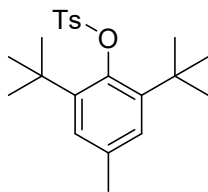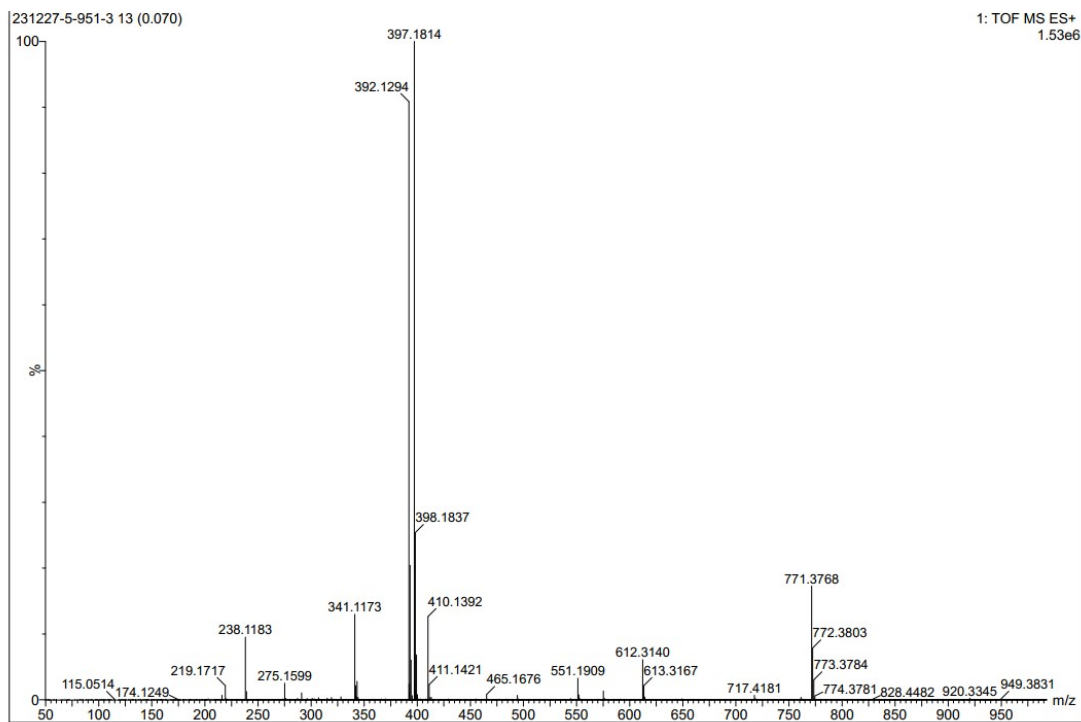

Monoisotopic Mass, Even Electron Ions  
 3084 formula(e) evaluated with 1 results within limits (up to 50 best isotopic matches for each mass)  
 Elements Used:  
 C: 22-22 H: 30-30 N: 0-20 O: 0-100 Na: 0-3 S: 1-4  
 31  
 231227-5-951-3 13 (0.070)

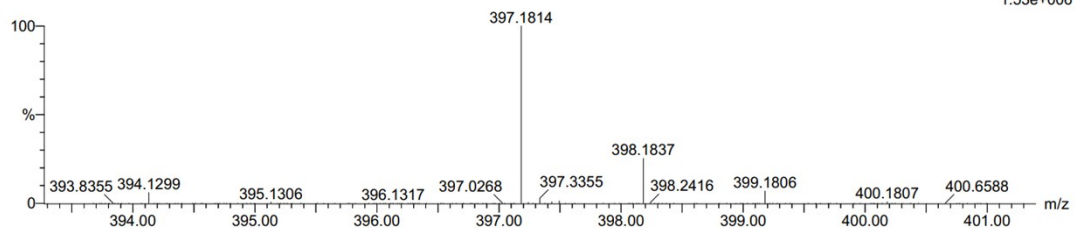

| Mass     | Calc. Mass | mDa | PPM | DBE | i-FIT | Norm | Conf (%) | Formula         |
|----------|------------|-----|-----|-----|-------|------|----------|-----------------|
| 397.1814 | 397.1813   | 0.1 | 0.3 | 7.5 | 389.3 | n/a  | n/a      | C22 H30 O3 Na S |

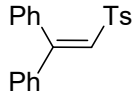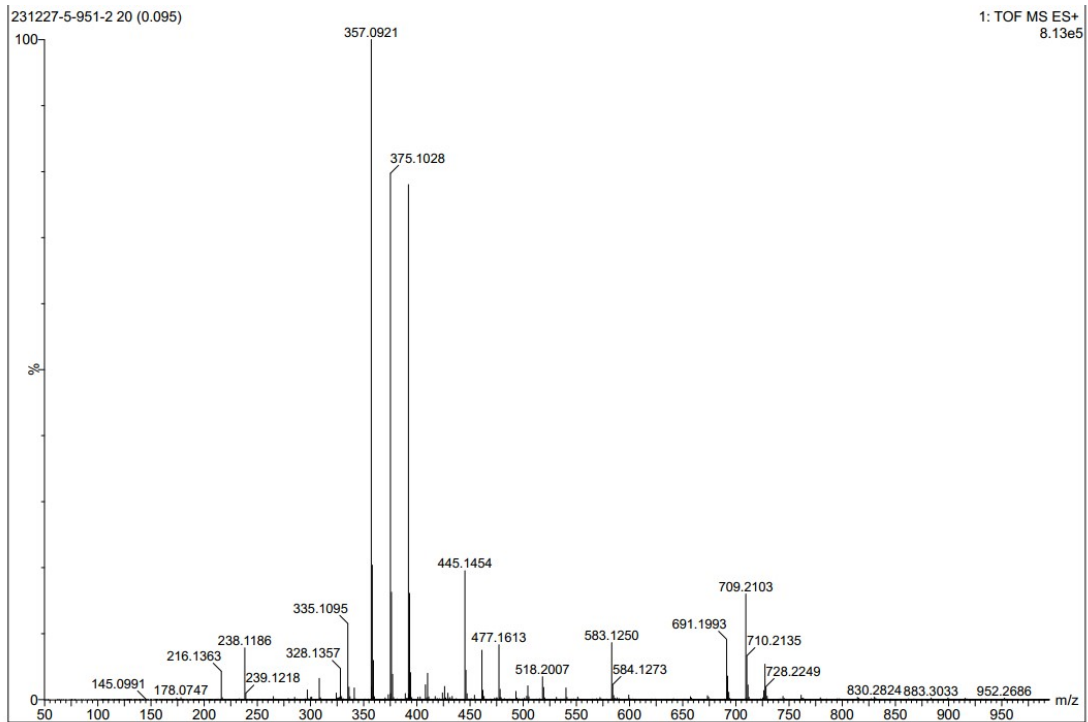

Monoisotopic Mass, Even Electron Ions  
 2391 formula(e) evaluated with 1 results within limits (up to 50 best isotopic matches for each mass)  
 Elements Used:  
 C: 21-21 H: 18-18 N: 0-20 O: 0-100 Na: 0-3 S: 1-4  
 31  
 231227-5-951-2 20 (0.095)

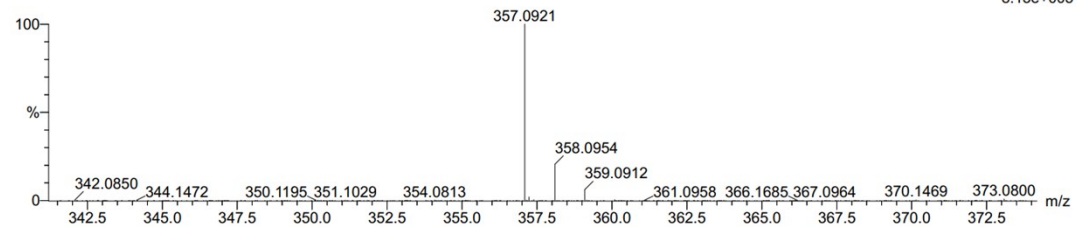

| Mass     | Calc. Mass | mDa  | PPM  | DBE  | i-FIT | Norm | Conf (%) | Formula         |
|----------|------------|------|------|------|-------|------|----------|-----------------|
| 357.0921 | 357.0925   | -0.4 | -1.1 | 12.5 | 295.5 | n/a  | n/a      | C21 H18 O2 Na S |

## 7. X-ray diffraction analysis of compound 3r.

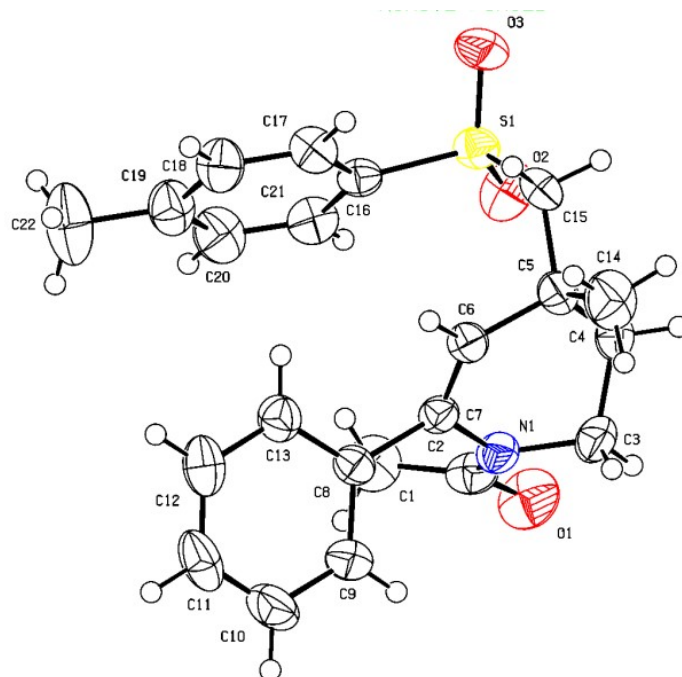

Bond precision: C-C = 0.0027 Å Wavelength=0.71073

Cell: a=8.5137(12) b=16.661(3) c=14.8228(19)

alpha=90 beta=92.652(6) gamma=90

Temperature: 273 K

Calculated Reported

Volume 2100.3(6) 2100.3(5)

Space group P 21/c P 1 21/c 1

Hall group -P 2ybc -P 2ybc

Moiety formula C<sub>22</sub> H<sub>25</sub> N O<sub>3</sub> S C<sub>22</sub> H<sub>25</sub> N O<sub>3</sub> S

Sum formula C<sub>22</sub> H<sub>25</sub> N O<sub>3</sub> S C<sub>22</sub> H<sub>25</sub> N O<sub>3</sub> S

Mr 383.49 383.49

Dx,g cm<sup>-3</sup> 1.213 1.213

Z 4 4

Mu (mm<sup>-1</sup>) 0.175 0.175

F000 816.0 816.0

F000' 816.84

h,k,lmax 10,21,19 10,21,19

Nref 4725 4678

Tmin,Tmax 0.924,0.932 0.551,0.746

Tmin' 0.924

Correction method= # Reported T Limits: Tmin=0.551 Tmax=0.746

AbsCorr = NONE

Data completeness= 0.990 Theta(max)= 27.315

R(reflections)= 0.0507( 4210) wR2(reflections)=  
0.1310( 4678)

S = 1.064 Npar= 247



## 8. Characterization Data of 3a – 3u, 4a – 4l.

### 1-(6-phenyl-4-(tosylmethyl)-3,4-dihydropyridin-1(2H)-yl)ethan-1-one (3a)

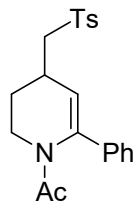

White solid; mp 83.4-84.6 °C;  $^1\text{H}$  NMR (600 MHz,  $\text{CDCl}_3$ )  $\delta$  7.81 (d,  $J = 7.5$  Hz, 2H), 7.38 (d,  $J = 7.5$  Hz, 2H), 7.35 – 7.21 (m, 5H), 5.44 (s, 1H), 4.00 (s, 1H), 3.65 (t,  $J = 9.3$  Hz, 1H), 3.21 (dd,  $J = 13.8, 6.3$  Hz, 1H), 3.14 (dd,  $J = 13.6, 6.7$  Hz, 1H), 3.05 (s, 1H), 2.13 (s, 1H), 1.73 (s, 1H), 1.60 (s, 3H).  $^{13}\text{C}$  NMR (151 MHz,  $\text{CDCl}_3$ )  $\delta$  171.1, 145.0, 141.9, 138.8, 136.7, 130.1, 128.8, 128.4, 128.0, 125.8, 118.6, 61.12, 42.1, 30.5, 30.03, 25.1, 21.7.

HRMS (ESI,  $m/z$ ): Calcd. For  $\text{C}_{21}\text{H}_{24}\text{NO}_3\text{SNa}$   $[\text{M}+\text{Na}]^+$  392.1291, found: 392.1299.

### 1-(6-(4-fluorophenyl)-4-(tosylmethyl)-3,4-dihydropyridin-1(2H)-yl)ethan-1-one (3b)

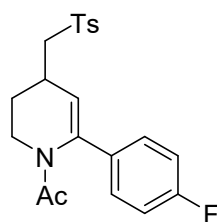

White solid; mp 84.0-84.8 °C;  $^1\text{H}$  NMR (600 MHz,  $\text{CDCl}_3$ )  $\delta$  7.81 (d,  $J = 8.1$  Hz, 2H), 7.38 (d,  $J = 8.1$  Hz, 2H), 7.26 (d,  $J = 5.3$  Hz, 2H), 7.02 (t,  $J = 7.9$  Hz, 2H), 5.43 (s, 1H), 4.00 (s, 1H), 3.63 (ddd,  $J = 12.4, 9.3, 3.0$  Hz, 1H), 3.19 (dd,  $J = 14.0, 6.7$  Hz, 1H), 3.13 (dd,  $J = 14.0, 6.7$  Hz, 1H), 3.05 (dd,  $J = 10.3, 6.7$  Hz, 1H), 2.46 (d,  $J = 7.9$  Hz, 3H), 2.13 (s, 1H), 1.72 (s, 1H), 1.62 (s, 3H).  $^{13}\text{C}$  NMR (151 MHz,  $\text{CDCl}_3$ )  $\delta$  171.0, 162.7 ( $J_{\text{C-F}} = 257$  Hz), 145.0, 140.9, 136.7, 134.9, 130.1, 127.9, 127.5, 118.5, 115.8 ( $J_{\text{C-F}} = 15$  Hz), 61.1, 42.2, 30.5, 30.0, 25.1, 21.7.  $^{19}\text{F}$  NMR (565 MHz,  $\text{CDCl}_3$ )  $\delta$  -112.71.

HRMS (ESI,  $m/z$ ): Calcd. For  $\text{C}_{21}\text{H}_{23}\text{NO}_3\text{FS}$   $[\text{M}+\text{H}]^+$  388.1377, found: 388.1372.

### 1-(6-(4-chlorophenyl)-4-(tosylmethyl)-3,4-dihydropyridin-1(2H)-yl)ethan-1-one (3c)

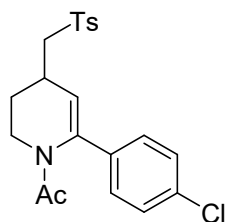

White solid; mp 91.2-92.4 °C;  $^1\text{H}$  NMR (600 MHz,  $\text{CDCl}_3$ )  $\delta$  7.81 (d,  $J = 7.8$  Hz, 2H), 7.38 (d,  $J = 7.8$  Hz, 2H), 7.30 (d,  $J = 6.5$  Hz, 2H), 7.22 (s, 2H), 5.48 (s, 1H), 4.00 (s, 1H), 3.62 (t,  $J = 9.7$  Hz, 1H), 3.19 (dd,  $J = 14.0, 6.7$  Hz, 1H), 3.13 (dd,  $J = 14.0, 6.6$  Hz, 1H), 3.06 (s, 1H), 2.47 (s, 3H), 2.13 (s, 1H), 1.73 (s, 1H), 1.62 (s, 3H).  $^{13}\text{C}$  NMR (151 MHz,  $\text{CDCl}_3$ )  $\delta$  170.9, 145.1, 140.9, 137.3, 136.69, 134.2, 130.1, 129.0, 127.9, 127.0, 119.1, 61.0, 42.110, 30.430, 30.0, 25.1, 21.7.

HRMS (ESI,  $m/z$ ): Calcd. For  $\text{C}_{21}\text{H}_{23}\text{NO}_3\text{ClS}$   $[\text{M}+\text{H}]^+$  404.1082, found: 404.1085.

### 1-(6-(4-bromophenyl)-4-(tosylmethyl)-3,4-dihydropyridin-1(2H)-yl)ethan-1-one

#### (3d)

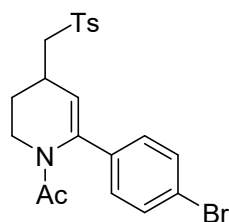

White solid; mp 89.4-90.8 °C;  $^1\text{H}$  NMR (600 MHz,  $\text{CDCl}_3$ )  $\delta$  7.81 (d,  $J = 8.0$  Hz, 2H), 7.46 (s, 2H), 7.38 (d,  $J = 7.9$  Hz, 2H), 7.16 (s, 2H), 5.48 (s, 1H), 4.00 (s, 1H), 3.68 – 3.53 (m, 1H), 3.20 (dd,  $J = 14.0, 6.7$  Hz, 1H), 3.13 (dd,  $J = 14.0, 6.7$  Hz, 1H), 3.05 (s, 1H), 2.47 (s, 3H), 2.13 (s, 1H), 1.72 (s, 1H), 1.61 (s, 3H).  $^{13}\text{C}$  NMR (151 MHz,  $\text{CDCl}_3$ )  $\delta$  170.9, 145.1, 140.9, 137.7, 136.7, 132.0, 130.1, 127.9, 127.3, 122.3, 119.2, 60.9, 42.1, 30.4, 30.0, 25.1, 21.7.

HRMS (ESI,  $m/z$ ): Calcd. For  $\text{C}_{21}\text{H}_{22}\text{NO}_3\text{BrSNa}$   $[\text{M}+\text{Na}]^+$  470.0396, found: 470.0401.

### 1-(6-(4-iodophenyl)-4-(tosylmethyl)-3,4-dihydropyridin-1(2H)-yl)ethan-1-one (3e)

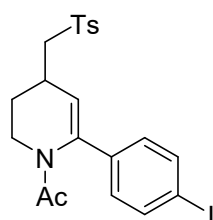

White solid; mp 106.5-108.1 °C; <sup>1</sup>H NMR (600 MHz, CDCl<sub>3</sub>) δ 7.80 (d, *J* = 8.0 Hz, 2H), 7.65 (s, 2H), 7.37 (d, *J* = 7.8 Hz, 2H), 7.02 (s, 2H), 5.47 (s, 1H), 3.99 (s, 1H), 3.61 (t, *J* = 9.6 Hz, 1H), 3.20 (dd, *J* = 14.0, 6.7 Hz, 1H), 3.13 (dd, *J* = 13.9, 6.7 Hz, 1H), 3.04 (s, 1H), 2.46 (s, 3H), 2.11 (s, 1H), 1.81 (s, 1H), 1.61 (s, 3H). <sup>13</sup>C NMR (151 MHz, CDCl<sub>3</sub>) δ 170.97, 145.07, 141.03, 138.40, 137.93, 136.68, 130.13, 127.93, 127.46, 119.30, 93.94, 60.91, 42.18, 30.40, 30.04, 25.21, 21.70.

HRMS (ESI, m/z): Calcd. For C<sub>21</sub>H<sub>26</sub>NIO<sub>3</sub>S [M+H]<sup>+</sup> 496.0438, found: 496.0446.

**1-(4-(tosylmethyl)-6-(4-(trifluoromethyl)phenyl)-3,4-dihydropyridin-1(2H)-yl)ethan-1-one (3f)**

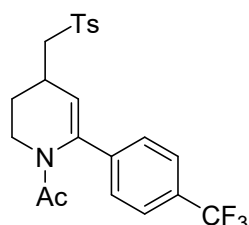

Amorphous solid; <sup>1</sup>H NMR (600 MHz, CDCl<sub>3</sub>) δ 7.81 (d, *J* = 8.1 Hz, 2H), 7.59 (s, 2H), 7.38 (d, *J* = 8.0 Hz, 4H), 5.60 (s, 1H), 4.02 (s, 1H), 3.69 – 3.60 (m, 1H), 3.21 (dd, *J* = 13.9, 6.7 Hz, 1H), 3.15 (dd, *J* = 13.9, 6.6 Hz, 1H), 3.10 (s, 1H), 2.47 (s, 3H), 2.16 (s, 1H), 1.75 (s, 1H), 1.61 (s, 3H). <sup>13</sup>C NMR (151 MHz, CDCl<sub>3</sub>) δ 170.9, 145.1, 142.3, 140.8, 136.7, 130.2, 127.9, 125.9 (*J*<sub>C-F</sub> = 3 Hz), 123.9 (*J*<sub>C-F</sub> = 272 Hz), 120.8, 60.9, 42.2, 30.4, 30.1, 25.1, 21.7. <sup>19</sup>F NMR (565 MHz, CDCl<sub>3</sub>) δ -62.6.

HRMS (ESI, m/z): Calcd. For C<sub>22</sub>H<sub>23</sub>NF<sub>3</sub>O<sub>3</sub>S [M+H]<sup>+</sup> 438.1345, found: 438.1347.

**4-(1-acetyl-4-(tosylmethyl)-1,4,5,6-tetrahydropyridin-2-yl)benzotrile (3g)**

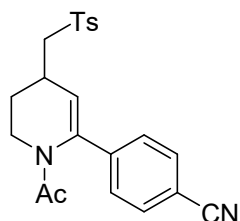

White solid; mp 82.7-83.6 °C; <sup>1</sup>H NMR (600 MHz, CDCl<sub>3</sub>) δ 7.81 (d, *J* = 7.4 Hz, 2H), 7.62 (s, 2H), 7.39 (d, *J* = 7.3 Hz, 4H), 5.68 (s, 1H), 4.03 (s, 1H), 3.62 (t, *J* = 10.1 Hz, 1H), 3.26 – 3.03 (m, 3H), 2.47 (s, 3H), 2.16 (s, 2H), 1.68 (d, *J* = 89.8 Hz, 3H). <sup>13</sup>C NMR (151 MHz, CDCl<sub>3</sub>) δ 170.72, 145.18, 143.13, 140.49, 136.60, 132.53, 130.16,

127.90, 126.23, 121.81, 118.36, 111.98, 60.69, 42.22, 30.30, 30.08, 24.83, 21.67.  
HRMS (ESI, m/z): Calcd. For C<sub>22</sub>H<sub>22</sub>N<sub>2</sub>O<sub>3</sub>SNa [M+Na]<sup>+</sup> 417.1243, found: 417.1250.

**1-(6-(p-tolyl)-4-(tosylmethyl)-3,4-dihydropyridin-1(2H)-yl)ethan-1-one (3h)**

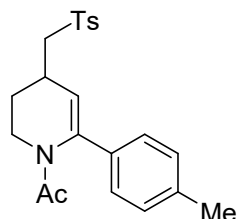

White solid; mp 92.1-93.8 °C; <sup>1</sup>H NMR (600 MHz, CDCl<sub>3</sub>) δ 7.81 (d, *J* = 8.1 Hz, 2H), 7.38 (d, *J* = 7.9 Hz, 2H), 7.14 (d, *J* = 10.7 Hz, 4H), 5.39 (s, 1H), 3.98 (s, 1H), 3.71 – 3.59 (m, 1H), 3.20 (dd, *J* = 14.0, 6.5 Hz, 1H), 3.13 (dd, *J* = 14.0, 6.9 Hz, 1H), 3.03 (d, *J* = 3.5 Hz, 1H), 2.46 (s, 3H), 2.34 (s, 3H), 2.11 (s, 1H), 1.72 (s, 1H), 1.61 (s, 3H). <sup>13</sup>C NMR (151 MHz, CDCl<sub>3</sub>) δ 171.23, 144.97, 141.86, 138.38, 136.76, 135.96, 130.09, 129.48, 127.96, 125.65, 117.74, 61.19, 42.04, 30.54, 30.00, 25.13, 21.65, 21.18.  
HRMS (ESI, m/z): Calcd. For C<sub>22</sub>H<sub>25</sub>NO<sub>3</sub>SNa [M+Na]<sup>+</sup> 406.1447, found: 406.1456.

**1-(6-(4-methoxyphenyl)-4-(tosylmethyl)-3,4-dihydropyridin-1(2H)-yl)ethan-1-one (3i)**

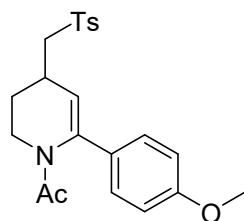

White solid; mp 102.8-103.5 °C; <sup>1</sup>H NMR (600 MHz, CDCl<sub>3</sub>) δ 7.81 (d, *J* = 8.1 Hz, 2H), 7.38 (d, *J* = 8.0 Hz, 2H), 7.20 (d, *J* = 8.3 Hz, 2H), 6.85 (d, *J* = 8.5 Hz, 2H), 5.34 (s, 1H), 3.98 (s, 1H), 3.82 (d, *J* = 10.0 Hz, 3H), 3.63 (ddd, *J* = 12.3, 9.2, 3.0 Hz, 1H), 3.20 (dd, *J* = 14.0, 6.5 Hz, 1H), 3.13 (dd, *J* = 14.0, 6.9 Hz, 1H), 3.03 (dd, *J* = 6.7, 3.8 Hz, 1H), 2.46 (s, 3H), 2.11 (s, 1H), 1.72 (s, 1H), 1.62 (s, 3H). <sup>13</sup>C NMR (151 MHz, CDCl<sub>3</sub>) δ 171.27, 159.73, 144.95, 141.52, 136.77, 131.29, 130.08, 130.00, 127.94, 127.02, 116.95, 114.16, 61.23, 55.33, 42.11, 30.56, 29.95, 25.08, 21.65.  
HRMS (ESI, m/z): Calcd. For C<sub>22</sub>H<sub>25</sub>NO<sub>4</sub>SNa [M+Na]<sup>+</sup> 422.1397, found: 422.1402.

**1-(6-(4-(benzyloxy)phenyl)-4-(tosylmethyl)-3,4-dihydropyridin-1(2H)-yl)ethan-1-one (3j)**

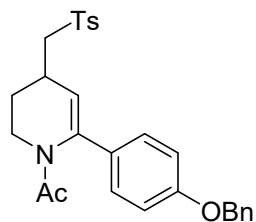

White solid; mp 97.6-98.8 °C;  $^1\text{H}$  NMR (600 MHz,  $\text{CDCl}_3$ )  $\delta$  7.81 (d,  $J = 8.1$  Hz, 2H), 7.42 (d,  $J = 7.4$  Hz, 2H), 7.40 – 7.35 (m, 4H), 7.32 (s, 1H), 7.19 (d,  $J = 8.2$  Hz, 2H), 6.93 (d,  $J = 8.5$  Hz, 2H), 5.34 (s, 1H), 5.05 (s, 2H), 3.97 (s, 1H), 3.71 – 3.57 (m, 1H), 3.19 (dd,  $J = 14.0, 6.5$  Hz, 1H), 3.12 (dd,  $J = 14.0, 6.8$  Hz, 1H), 3.02 (dd,  $J = 10.4, 6.7$  Hz, 1H), 2.45 (s, 3H), 2.10 (s, 1H), 1.70 (s, 1H), 1.63 (s, 3H).  $^{13}\text{C}$  NMR (151 MHz,  $\text{CDCl}_3$ )  $\delta$  171.27, 158.93, 144.96, 141.49, 136.77, 136.62, 131.55, 130.08, 128.62, 128.09, 127.95, 127.49, 127.04, 117.05, 115.11, 61.25, 42.08, 30.57, 29.96, 25.11, 21.65.

HRMS (ESI,  $m/z$ ): Calcd. For  $\text{C}_{28}\text{H}_{30}\text{NO}_4\text{S}$   $[\text{M}+\text{H}]^+$  476.1890, found: 476.1889.

**1-(6-(3-bromophenyl)-4-(tosylmethyl)-3,4-dihydropyridin-1(2H)-yl)ethan-1-one (3k)**

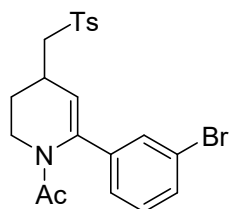

White solid; mp 59.5-61.8 °C;  $^1\text{H}$  NMR (600 MHz,  $\text{CDCl}_3$ )  $\delta$  7.81 (d,  $J = 8.2$  Hz, 2H), 7.40 (t,  $J = 11.4$  Hz, 4H), 7.21 (s, 2H), 5.46 (s, 1H), 4.00 (s, 1H), 3.62 (ddd,  $J = 12.4, 9.3, 3.0$  Hz, 1H), 3.20 (d0,  $J = 14.0, 6.7$  Hz, 1H), 3.14 (dd,  $J = 14.0, 6.7$  Hz, 1H), 3.06 (dd,  $J = 10.4, 6.7$  Hz, 1H), 2.47 (s, 3H), 2.14 (s, 1H), 1.73 (s, 1H), 1.65 (s, 3H).  $^{13}\text{C}$  NMR (151 MHz,  $\text{CDCl}_3$ )  $\delta$  170.91, 145.11, 140.82, 140.58, 136.68, 131.38, 130.33, 130.14, 128.60, 127.94, 14.33, 123.00, 119.85, 77.25, 77.04, 76.83, 60.94, 42.17, 30.43, 30.07, 25.19, 21.69.

HRMS (ESI,  $m/z$ ): Calcd. For  $\text{C}_{21}\text{H}_{23}\text{NO}_3\text{BrS}$   $[\text{M}+\text{H}]^+$  448.0577, found: 448.0575.

**1-(6-(2-chlorophenyl)-4-(tosylmethyl)-3,4-dihydropyridin-1(2H)-yl)ethan-1-one (3l)**

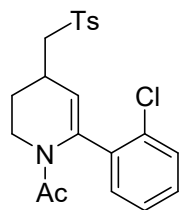

White solid; mp 75.6-76.9 °C; <sup>1</sup>H NMR (600 MHz, CDCl<sub>3</sub>) δ 7.88 – 7.74 (m, 2H), 7.37 (d, *J* = 7.8 Hz, 2H), 7.33 (s, 1H), 7.25 (s, 3H), 5.29 (s, 1H), 4.02 (s, 1H), 3.65 (s, 1H), 3.21 (dd, *J* = 14.0, 6.1 Hz, 1H), 3.15 (dd, *J* = 14.0, 7.2 Hz, 1H), 3.05 (s, 1H), 2.46 (d, *J* = 5.0 Hz, 3H), 2.18 (s, 1H), 1.80 (s, 1H), 1.55 (s, 3H). <sup>13</sup>C NMR (151 MHz, CDCl<sub>3</sub>) δ 169.46, 144.99, 138.80, 137.52, 136.68, 132.18, 130.09, 129.46, 127.91, 127.16, 120.53, 60.91, 41.20, 29.84, 24.50, 21.64.

HRMS (ESI, *m/z*): Calcd. For C<sub>21</sub>H<sub>23</sub>NO<sub>3</sub>ClS [M+H]<sup>+</sup> 404.1082, found: 404.1083.

**1-(6-(3,4-dichlorophenyl)-4-(tosylmethyl)-3,4-dihydropyridin-1(2H)-yl)ethan-1-one (3m)**

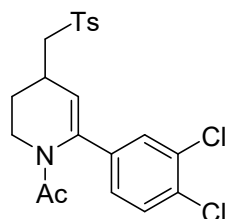

Amorphous solid; <sup>1</sup>H NMR (600 MHz, CDCl<sub>3</sub>) δ 7.81 (d, *J* = 8.2 Hz, 2H), 7.37 (dd, *J* = 18.1, 8.4 Hz, 4H), 7.11 (d, *J* = 16.3 Hz, 1H), 5.50 (s, 1H), 3.99 (s, 1H), 3.60 (ddd, *J* = 12.6, 9.4, 3.0 Hz, 1H), 3.20 (dd, *J* = 14.0, 6.8 Hz, 1H), 3.14 (dd, *J* = 14.0, 6.6 Hz, 1H), 3.07 (d, *J* = 3.4 Hz, 1H), 2.47 (s, 3H), 2.14 (s, 1H), 1.75 (s, 1H), 1.65 (s, 3H). <sup>13</sup>C NMR (151 MHz, CDCl<sub>3</sub>) δ 170.88, 145.16, 139.90, 138.75, 136.66, 133.24, 132.37, 130.78, 130.16, 127.93, 127.38, 124.88, 120.24, 60.83, 42.19, 30.38, 30.05, 25.12, 21.68.

HRMS (ESI, *m/z*): Calcd. For C<sub>21</sub>H<sub>21</sub>NO<sub>3</sub>Cl<sub>2</sub>SNa [M+Na]<sup>+</sup> 460.0511, found: 460.0517.

**1-(6-(naphthalen-2-yl)-4-(tosylmethyl)-3,4-dihydropyridin-1(2H)-yl)ethan-1-one (3n)**

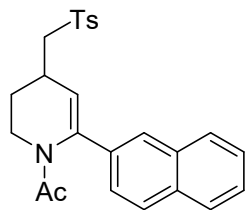

White solid; mp 99.4-101.1 °C;  $^1\text{H}$  NMR (600 MHz,  $\text{CDCl}_3$ )  $\delta$  7.83 (d,  $J = 7.8$  Hz, 2H), 7.80 (d,  $J = 8.8$  Hz, 3H), 7.75 (s, 1H), 7.49 (s, 2H), 7.38 (d,  $J = 7.8$  Hz, 3H), 5.59 (s, 1H), 4.07 (s, 1H), 3.71 (t,  $J = 9.6$  Hz, 1H), 3.25 (dd,  $J = 14.0, 6.5$  Hz, 1H), 3.17 (dd,  $J = 14.0, 6.8$  Hz, 1H), 3.10 (d,  $J = 3.5$  Hz, 1H), 2.46 (s, 3H), 2.17 (s, 1H), 1.77 (s, 1H), 1.64 (s, 3H).  $^{13}\text{C}$  NMR (151 MHz,  $\text{CDCl}_3$ )  $\delta$  171.31, 145.02, 141.93, 136.76, 136.15, 133.31, 133.15, 130.11, 128.67, 128.11, 127.97, 127.71, 126.67, 126.48, 124.67, 123.65, 119.30, 61.14, 42.16, 30.58, 30.18, 25.17, 21.66.

HRMS (ESI,  $m/z$ ): Calcd. For  $\text{C}_{25}\text{H}_{25}\text{NO}_3\text{SNa}$   $[\text{M}+\text{Na}]^+$  442.1447, found: 442.1450.

**1-(6-(thiophen-2-yl)-4-(tosylmethyl)-3,4-dihydropyridin-1(2H)-yl)ethan-1-one (3o)**

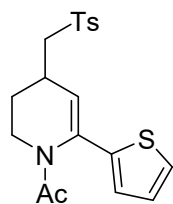

White solid; mp 64.9-66.4 °C;  $^1\text{H}$  NMR (600 MHz,  $\text{CDCl}_3$ )  $\delta$  7.81 (d,  $J = 8.1$  Hz, 2H), 7.38 (d,  $J = 8.1$  Hz, 2H), 7.23 (d,  $J = 4.7$  Hz, 1H), 6.97 (dd,  $J = 11.5, 7.0$  Hz, 2H), 5.51 (d,  $J = 3.4$  Hz, 1H), 3.92 (d,  $J = 4.1$  Hz, 1H), 3.73 – 3.57 (m, 1H), 3.20 (dd,  $J = 14.0, 6.2$  Hz, 1H), 3.12 (dd,  $J = 14.0, 7.1$  Hz, 1H), 3.08 – 2.99 (m, 1H), 2.12 (s, 1H), 1.81 (s, 3H), 1.73 (s, 1H).  $^{13}\text{C}$  NMR (151 MHz,  $\text{CDCl}_3$ )  $\delta$  171.41, 145.03, 141.87, 136.65, 136.19, 130.10, 127.93, 127.42, 125.39, 124.52, 118.02, 60.97, 42.21, 30.48, 29.90, 24.25, 21.65.

HRMS (ESI,  $m/z$ ): Calcd. For  $\text{C}_{19}\text{H}_{22}\text{NO}_3\text{S}$   $[\text{M}+\text{H}]^+$  376.1036, found: 376.1034.

**1-(6-(tert-butyl)-4-(tosylmethyl)-3,4-dihydropyridin-1(2H)-yl)ethan-1-one (3p)**

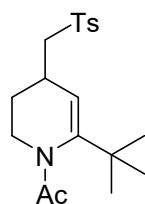

Amorphous solid;  $^1\text{H}$  NMR (600 MHz,  $\text{CDCl}_3$ )  $\delta$  7.77 (d,  $J = 7.7$  Hz, 2H), 7.36 (d,  $J = 7.8$  Hz, 2H), 5.31 (s, 1H), 3.14 (dd,  $J = 13.7, 5.5$  Hz, 1H), 3.07 – 2.98 (m, 1H), 2.45 (s, 3H), 2.19 (s, 1H), 2.09 (s, 3H), 1.67 (s, 1H), 1.10 (s, 9H).  $^{13}\text{C}$  NMR (151 MHz,  $\text{CDCl}_3$ )  $\delta$  172.15, 154.41, 144.93, 136.67, 130.03, 127.96, 118.18, 61.66, 47.25, 37.04, 31.07, 30.38, 29.01, 22.80, 21.63.

HRMS (ESI,  $m/z$ ): Calcd. For  $\text{C}_{19}\text{H}_{28}\text{NO}_3\text{S}$   $[\text{M}+\text{H}]^+$  350.1784, found: 350.1786.

**1-(5-ethyl-6-phenyl-4-(tosylmethyl)-3,4-dihydropyridin-1(2H)-yl)ethan-1-one (3q)**

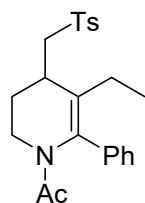

Amorphous solid;  $^1\text{H}$  NMR (600 MHz,  $\text{CDCl}_3$ )  $\delta$  7.81 (d,  $J = 7.7$  Hz, 2H), 7.38 (d,  $J = 7.7$  Hz, 2H), 7.33 (t,  $J = 7.1$  Hz, 2H), 7.28 (d,  $J = 7.4$  Hz, 1H), 7.17 (d,  $J = 7.8$  Hz, 2H), 4.30 (s, 1H), 3.25 (s, 1H), 3.20 (dd,  $J = 14.0, 3.9$  Hz, 1H), 3.13 (dd,  $J = 14.0, 8.9$  Hz, 1H), 3.05 (d,  $J = 2.5$  Hz, 1H), 2.47 (s, 3H), 2.32 (dd,  $J = 13.8, 6.9$  Hz, 1H), 2.13 (dd,  $J = 12.1, 5.8$  Hz, 2H), 2.07 – 1.97 (m, 1H), 1.51 (s, 3H), 0.89 (t,  $J = 6.7$  Hz, 3H).  $^{13}\text{C}$  NMR (151 MHz,  $\text{CDCl}_3$ )  $\delta$  170.83, 144.95, 137.84, 136.90, 136.42, 133.10, 130.08, 128.59, 128.44, 127.92, 127.84, 58.70, 41.49, 31.89, 30.29, 24.61, 24.54, 21.66, 12.86.

HRMS (ESI,  $m/z$ ): Calcd. For  $\text{C}_{23}\text{H}_{28}\text{NO}_3\text{S}$   $[\text{M}+\text{H}]^+$  398.1784, found: 398.1786.

**1-(4-methyl-6-phenyl-4-(tosylmethyl)-3,4-dihydropyridin-1(2H)-yl)ethan-1-one (3r)**

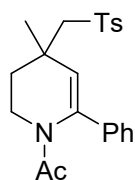

White solid; mp 88.8-89.5 °C;  $^1\text{H}$  NMR (600 MHz,  $\text{CDCl}_3$ )  $\delta$  7.78 (d,  $J = 8.2$  Hz, 2H), 7.32 (t,  $J = 8.2$  Hz, 7H), 5.40 (s, 1H), 4.40 (s, 1H), 3.34 (s, 1H), 2.43 (s, 3H), 2.25 (ddd,  $J = 13.9, 10.4, 3.8$  Hz, 1H), 1.78 (s, 1H), 1.63 (s, 3H), 1.35 (s, 3H).  $^{13}\text{C}$  NMR (151 MHz,  $\text{CDCl}_3$ )  $\delta$  171.44, 144.62, 139.93, 138.99, 138.49, 129.96, 128.75, 128.28, 127.65, 125.97, 123.27, 65.95, 41.10, 36.60, 36.02, 28.56, 25.13, 21.61.



HRMS (ESI, m/z): Calcd. For C<sub>22</sub>H<sub>26</sub>NO<sub>3</sub>S [M+H]<sup>+</sup> 384.1628, found: 384.1633.

**1-(4,6-diphenyl-4-(tosylmethyl)-3,4-dihydropyridin-1(2H)-yl)ethan-1-one (3s)**

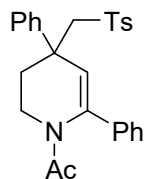

White solid; mp 103.3-104.6 °C; <sup>1</sup>H NMR (600 MHz, CDCl<sub>3</sub>) δ 7.60 (d, *J* = 8.1 Hz, 2H), 7.48 (s, 2H), 7.39 (t, *J* = 7.3 Hz, 2H), 7.36 (d, *J* = 7.1 Hz, 1H), 7.21 (dd, *J* = 7.9, 5.8 Hz, 6H), 7.18 (dd, *J* = 6.2, 2.2 Hz, 1H), 5.99 (s, 1H), 4.29 (s, 1H), 3.69 (s, 2H), 3.22 (t, *J* = 10.8 Hz, 1H), 2.61 (t, *J* = 10.4 Hz, 1H), 2.39 (s, 3H), 2.19 (d, *J* = 13.5 Hz, 1H), 1.66 (s, 3H). <sup>13</sup>C NMR (151 MHz, CDCl<sub>3</sub>) δ 171.79, 144.72, 144.37, 141.53, 139.17, 138.14, 129.79, 128.86, 128.60, 128.45, 127.65, 127.01, 126.42, 126.26, 120.03, 65.94, 42.71, 40.79, 37.98, 25.27, 21.56.

HRMS (ESI, m/z): Calcd. For C<sub>27</sub>H<sub>28</sub>NO<sub>3</sub>S [M+H]<sup>+</sup> 446.1784, found: 446.1788.

**benzyl 6-phenyl-4-(tosylmethyl)-3,4-dihydropyridine-1(2H)-carboxylate (3t)**

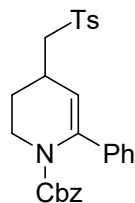

White solid; mp 84.5-85.7 °C; <sup>1</sup>H NMR (600 MHz, CDCl<sub>3</sub>) δ 7.79 (d, *J* = 8.2 Hz, 2H), 7.35 (d, *J* = 8.0 Hz, 2H), 7.28 – 7.23 (m, 3H), 7.23 – 7.18 (m, 3H), 7.16 (t, *J* = 7.0 Hz, 2H), 6.77 (s, 2H), 5.22 (d, *J* = 3.4 Hz, 1H), 4.89 (s, 2H), 3.94 (ddd, *J* = 12.8, 6.3, 3.2 Hz, 1H), 3.67 – 3.55 (m, 1H), 3.18 (dd, *J* = 14.1, 5.9 Hz, 1H), 3.11 (dd, *J* = 14.1, 7.4 Hz, 1H), 3.07 – 2.98 (m, 1H), 2.44 (s, 3H), 2.14 (dd, *J* = 6.8, 2.6 Hz, 1H), 1.87 – 1.72 (m, 1H). <sup>13</sup>C NMR (151 MHz, CDCl<sub>3</sub>) δ 154.60, 144.93, 141.23, 139.05, 136.82, 135.48, 130.09, 128.20, 127.97, 127.84, 127.71, 125.40, 116.17, 67.74, 61.09, 44.00, 29.90, 29.84, 21.66.

HRMS (ESI, m/z): Calcd. For C<sub>27</sub>H<sub>28</sub>NO<sub>4</sub>S [M+H]<sup>+</sup> 462.1734, found: 462.1735.

**1-(7-phenyl-5-(tosylmethyl)-2,3,4,5-tetrahydro-1H-azepin-1-yl)ethan-1-one (3u)**

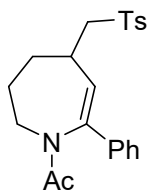

White solid; mp 83.9-85.2 °C;  $^1\text{H}$  NMR (600 MHz,  $\text{CDCl}_3$ )  $\delta$  7.80 (d,  $J = 8.1$  Hz, 2H), 7.38 (d,  $J = 8.1$  Hz, 2H), 7.36 – 7.31 (m, 3H), 7.26 (d,  $J = 7.0$  Hz, 2H), 6.11 (d,  $J = 5.0$  Hz, 1H), 4.64 (d,  $J = 13.1$  Hz, 1H), 3.44 – 3.33 (m, 1H), 3.18 (dd,  $J = 14.2, 2.6$  Hz, 1H), 2.86 (s, 1H), 2.61 (t,  $J = 12.4$  Hz, 1H), 2.47 (s, 3H), 1.93 (d,  $J = 12.5$  Hz, 1H), 1.81 (d,  $J = 13.6$  Hz, 1H), 1.69 (d,  $J = 10.1$  Hz, 4H), 1.37 (d,  $J = 11.5$  Hz, 1H).  $^{13}\text{C}$  NMR (151 MHz,  $\text{CDCl}_3$ )  $\delta$  170.25, 145.17, 143.27, 136.43, 136.16, 130.11, 128.93, 128.69, 128.14, 127.87, 124.80, 62.02, 45.13, 34.36, 31.03, 28.23, 22.46, 21.67. HRMS (ESI,  $m/z$ ): Calcd. For  $\text{C}_{22}\text{H}_{26}\text{NO}_3\text{S}$   $[\text{M}+\text{H}]^+$  384.1628, found: 384.1625.

**1-(4-(((4-fluorophenyl)sulfonyl)methyl)-6-phenyl-3,4-dihydropyridin-1(2H)-yl)ethan-1-one (4a)**

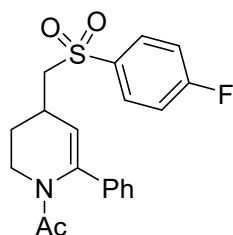

White solid; mp 77.6-79.9 °C;  $^1\text{H}$  NMR (600 MHz,  $\text{CDCl}_3$ )  $\delta$  7.96 (dd,  $J = 8.2, 5.1$  Hz, 2H), 7.41 – 7.19 (m, 7H), 5.45 (s, 1H), 4.01 (s, 1H), 3.67 (t,  $J = 9.6$  Hz, 1H), 3.22 (dd,  $J = 13.9, 6.5$  Hz, 1H), 3.16 (dd,  $J = 13.9, 6.9$  Hz, 1H), 3.08 (d,  $J = 3.3$  Hz, 1H), 2.16 (s, 1H), 1.77 (s, 1H), 1.61 (s, 3H).  $^{13}\text{C}$  NMR (151 MHz,  $\text{CDCl}_3$ )  $\delta$  171.12, 165.92 ( $J_{\text{C-F}} = 257$  Hz), 142.12, 138.76, 135.80 ( $J_{\text{C-F}} = 3$  Hz), 130.82 ( $J_{\text{C-F}} = 9$  Hz), 128.86, 128.49, 125.76, 118.18, 116.84 ( $J_{\text{C-F}} = 23$  Hz), 61.20, 42.01, 30.49, 29.93, 25.10.  $^{19}\text{F}$  NMR (565 MHz,  $\text{CDCl}_3$ )  $\delta$  -102.89.

HRMS (ESI,  $m/z$ ): Calcd. For  $\text{C}_{20}\text{H}_{20}\text{NO}_3\text{SFNa}$   $[\text{M}+\text{Na}]^+$  396.1040, found: 396.1050.

**1-(4-(((4-chlorophenyl)sulfonyl)methyl)-6-phenyl-3,4-dihydropyridin-1(2H)-yl)ethan-1-one (4b)**

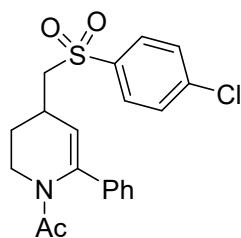

White solid; mp 112.2-113.3 °C;  $^1\text{H}$  NMR (600 MHz,  $\text{CDCl}_3$ )  $\delta$  7.87 (d,  $J = 5.5$  Hz, 2H), 7.56 (s, 2H), 7.30 (d,  $J = 36.0$  Hz, 5H), 5.42 (s, 1H), 4.01 (s, 1H), 3.66 (s, 1H), 3.22 (dd,  $J = 13.9, 6.5$  Hz, 1H), 3.15 (dd,  $J = 13.7, 6.8$  Hz, 1H), 3.07 (s, 1H), 2.15 (s, 1H), 1.76 (s, 1H), 1.61 (s, 3H).  $^{13}\text{C}$  NMR (151 MHz,  $\text{CDCl}_3$ )  $\delta$  171.12, 142.15, 140.76, 138.73, 138.17, 129.84, 129.43, 128.86, 128.49, 125.75, 118.09, 61.09, 42.05, 30.49, 29.92, 25.08.

HRMS (ESI,  $m/z$ ): Calcd. For  $\text{C}_{20}\text{H}_{20}\text{NO}_3\text{SClNa}$   $[\text{M}+\text{Na}]^+$  412.0745, found: 412.0755.

**1-(4-(((4-bromophenyl)sulfonyl)methyl)-6-phenyl-3,4-dihydropyridin-1(2H)-yl)ethan-1-one (4c)**

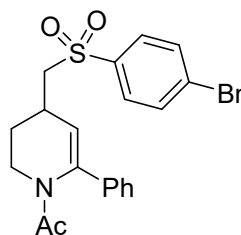

White solid; mp 120.4-121.7 °C;  $^1\text{H}$  NMR (600 MHz,  $\text{CDCl}_3$ )  $\delta$  7.80 (d,  $J = 8.1$  Hz, 2H), 7.73 (d,  $J = 8.1$  Hz, 2H), 7.44 – 7.25 (m, 5H), 5.42 (s, 1H), 4.02 (s, 1H), 3.66 (t,  $J = 9.6$  Hz, 1H), 2.15 (s, 1H), 1.76 (s, 1H), 1.61 (s, 3H).  $^{13}\text{C}$  NMR (151 MHz,  $\text{CDCl}_3$ )  $\delta$  171.09, 142.13, 138.68, 132.82, 129.47, 129.31, 128.85, 128.48, 125.73, 118.06, 61.03, 42.01, 30.47, 29.91, 25.09.

HRMS (ESI,  $m/z$ ): Calcd. For  $\text{C}_{20}\text{H}_{21}\text{NO}_3\text{SBr}$   $[\text{M}+\text{H}]^+$  434.0420, found: 434.0417.

**4-(((1-acetyl-6-phenyl-1,2,3,4-tetrahydropyridin-4-yl)methyl)sulfonyl)benzonitrile (4d)**

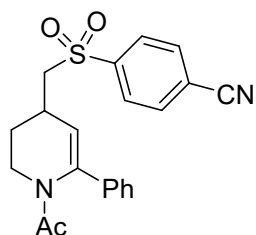

White solid; mp 98.7-99.9 °C;  $^1\text{H}$  NMR (600 MHz,  $\text{CDCl}_3$ )  $\delta$  8.08 (d,  $J = 7.3$  Hz, 2H),

7.89 (d,  $J = 7.0$  Hz, 2H), 7.33 (s, 3H), 7.28 (s, 2H), 5.42 (s, 1H), 4.03 (s, 1H), 3.68 (s, 1H), 3.26 (dd,  $J = 13.8, 6.4$  Hz, 1H), 3.19 (dd,  $J = 13.7, 6.9$  Hz, 1H), 3.12 (s, 1H), 2.18 (s, 1H), 1.79 (s, 1H), 1.61 (s, 3H).  $^{13}\text{C}$  NMR (151 MHz,  $\text{CDCl}_3$ )  $\delta$  171.09, 143.78, 142.43, 138.64, 133.26, 128.89, 128.76, 128.68, 125.74, 117.75, 117.58, 116.97, 60.84, 41.94, 30.44, 29.78, 25.14.

HRMS (ESI,  $m/z$ ): Calcd. For  $\text{C}_{21}\text{H}_{20}\text{N}_2\text{O}_3\text{SNa}$   $[\text{M}+\text{Na}]^+$  403.1087, found: 403.1092.

**1-(6-phenyl-4-(((4-(trifluoromethyl)phenyl)sulfonyl)methyl)-3,4-dihydropyridin-1(2H)-yl)ethan-1-one (4e)**

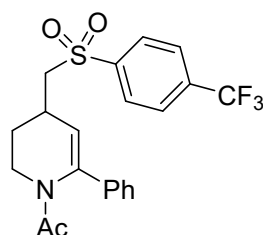

White solid; mp 65.3-66.8 °C;  $^1\text{H}$  NMR (600 MHz,  $\text{CDCl}_3$ )  $\delta$  8.09 (d,  $J = 8.0$  Hz, 2H), 7.87 (d,  $J = 8.0$  Hz, 2H), 7.33 (d,  $J = 7.2$  Hz, 3H), 7.27 (b, 2H), 5.42 (s, 1H), 4.04 (s, 1H), 3.67 (t,  $J = 10.4$  Hz, 1H), 3.26 (dd,  $J = 14.0, 6.6$  Hz, 1H), 3.20 (dd,  $J = 14.0, 6.7$  Hz, 1H), 3.12 (d,  $J = 3.2$  Hz, 1H), 2.18 (s, 1H), 1.88 – 1.72 (m, 2H), 1.61 (s, 3H).  $^{13}\text{C}$  NMR (151 MHz,  $\text{CDCl}_3$ )  $\delta$  171.18, 143.25, 142.35, 138.69, 135.70 ( $J_{\text{C-F}} = 33$  Hz), 128.89, 128.63, 128.57, 126.69 ( $J_{\text{C-F}} = 3.0$  Hz), 125.77, 123.06 ( $J_{\text{C-F}} = 273$  Hz), 117.84, 60.97, 42.06, 30.50, 29.87, 25.11.  $^{19}\text{F}$  NMR (565 MHz,  $\text{CDCl}_3$ )  $\delta$  -63.18.

HRMS (ESI,  $m/z$ ): Calcd. For  $\text{C}_{21}\text{H}_{21}\text{NO}_3\text{SF}_3\text{Na}$   $[\text{M}+\text{Na}]^+$  446.1008, found: 446.1002.

**1-(4-(((4-methoxyphenyl)sulfonyl)methyl)-6-phenyl-3,4-dihydropyridin-1(2H)-yl)ethan-1-one (4f)**

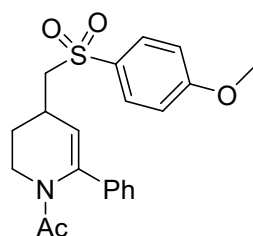

White solid; mp 107.8-108.5 °C;  $^1\text{H}$  NMR (600 MHz,  $\text{CDCl}_3$ )  $\delta$  7.86 (d,  $J = 8.4$  Hz, 2H), 7.38 – 7.27 (m, 5H), 7.04 (d,  $J = 8.4$  Hz, 2H), 5.45 (s, 1H), 4.00 (s, 1H), 3.66 (s, 1H), 3.20 (dd,  $J = 13.9, 6.4$  Hz, 1H), 3.16 – 3.10 (m, 1H), 3.04 (s, 1H), 2.12 (s, 1H), 1.73 (s, 1H), 1.60 (s, 3H).  $^{13}\text{C}$  NMR (151 MHz,  $\text{CDCl}_3$ )  $\delta$  171.17, 163.93, 141.85,

138.85, 131.20, 130.14, 128.84, 128.41, 125.76, 118.70, 114.67, 61.35, 55.76, 42.08, 30.51, 30.11, 25.10.

HRMS (ESI, m/z): Calcd. For  $C_{21}H_{22}NO_4SNa$   $[M+Na]^+$  408.1240, found: 408.1239.

**1-(4-(((4-(tert-butyl)phenyl)sulfonyl)methyl)-6-phenyl-3,4-dihydropyridin-1(2H)-yl)ethan-1-one (4g)**

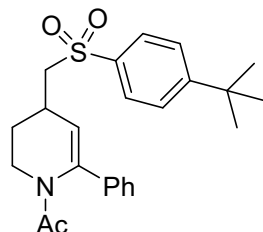

White solid; mp 89.0-89.8 °C;  $^1H$  NMR (600 MHz,  $CDCl_3$ )  $\delta$  7.85 (dd,  $J = 8.2, 3.1$  Hz, 2H), 7.62 – 7.57 (m, 2H), 7.29 (d,  $J = 25.8$  Hz, 5H), 5.45 (s, 1H), 4.01 (s, 1H), 3.66 (s, 1H), 3.22 (dd,  $J = 14.0, 6.7$  Hz, 1H), 3.15 (dd,  $J = 13.9, 6.6$  Hz, 1H), 3.07 (s, 1H), 2.15 (s, 1H), 1.76 (s, 1H), 1.60 (s, 3H), 1.35 (s, 9H).  $^{13}C$  NMR (151 MHz,  $CDCl_3$ )  $\delta$  171.14, 157.96, 141.85, 138.84, 136.67, 128.83, 128.40, 127.80, 126.50, 125.74, 118.69, 61.06, 42.10, 35.32, 31.07, 30.56, 30.01, 25.10.

HRMS (ESI, m/z): Calcd. For  $C_{24}H_{29}NO_3S$   $[M+H]^+$  412.1941, found: 412.1944.

**1-(4-(((3-chlorophenyl)sulfonyl)methyl)-6-phenyl-3,4-dihydropyridin-1(2H)-yl)ethan-1-one (4h)**

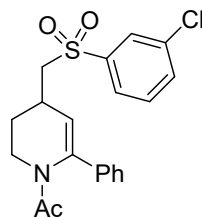

Amorphous solid;  $^1H$  NMR (600 MHz,  $CDCl_3$ )  $\delta$  7.94 (s, 1H), 7.83 (d,  $J = 7.8$  Hz, 1H), 7.65 (d,  $J = 8.0$  Hz, 1H), 7.54 (t,  $J = 7.9$  Hz, 1H), 7.38 – 7.26 (m, 5H), 5.46 (s, 1H), 4.02 (s, 1H), 3.75 – 3.61 (m, 1H), 3.24 (dd,  $J = 13.9, 6.5$  Hz, 1H), 3.17 (dd,  $J = 13.9, 6.9$  Hz, 1H), 3.10 (dd,  $J = 10.3, 6.6$  Hz, 1H), 2.17 (s, 1H), 1.78 (s, 1H), 1.61 (s, 3H).  $^{13}C$  NMR (151 MHz,  $CDCl_3$ )  $\delta$  171.11, 142.20, 141.45, 138.72, 135.77, 134.10, 130.84, 128.85, 128.49, 128.01, 126.02, 125.75, 118.05, 60.99, 42.01, 30.48, 29.85, 25.08.

HRMS (ESI, m/z): Calcd. For  $C_{20}H_{20}NO_3SClNa$   $[M+Na]^+$  412.0745, found: 412.0750.

**1-(4-(((2-methoxyphenyl)sulfonyl)methyl)-6-phenyl-3,4-dihydropyridin-1(2H)-yl)ethan-1-one (4i)**

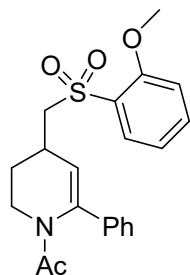

White solid; mp 69.5-70.8 °C; ;  $^1\text{H}$  NMR (600 MHz,  $\text{CDCl}_3$ )  $\delta$  7.98 (dd,  $J = 7.8, 1.4$  Hz, 1H), 7.61 (d,  $J = 7.3$  Hz, 1H), 7.37 – 7.29 (m, 3H), 7.27 (s, 2H), 7.12 (t,  $J = 7.5$  Hz, 1H), 7.07 (d,  $J = 8.3$  Hz, 1H), 5.43 (s, 1H), 3.99 (s, 1H), 4.00 (s, 3H), 3.68 – 3.58 (m, 1H), 3.51 – 3.38 (m, 2H), 3.07 (d,  $J = 3.4$  Hz, 1H), 2.10 (s, 1H), 1.77 (s, 1H), 1.60 (s, 3H).  $^{13}\text{C}$  NMR (151 MHz,  $\text{CDCl}_3$ )  $\delta$  171.21, 157.29, 141.73, 138.89, 135.83, 130.29, 128.82, 128.36, 127.57, 125.74, 121.01, 119.02, 112.55, 59.19, 56.46, 42.13, 30.41, 30.02, 25.12.

HRMS (ESI,  $m/z$ ): Calcd. For  $\text{C}_{21}\text{H}_{23}\text{NO}_4\text{S}$   $[\text{M}+\text{H}]^+$  386.1421, found: 386.1424.

**1-(4-(((naphthalen-2-ylsulfonyl)methyl)-6-phenyl-3,4-dihydropyridin-1(2H)-yl)ethan-1-one (4j)**

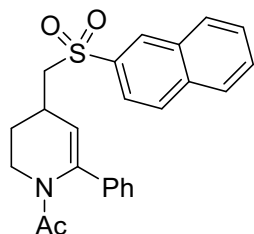

White solid; mp 82.4-83.7 °C;  $^1\text{H}$  NMR (600 MHz,  $\text{CDCl}_3$ )  $\delta$  8.52 (s, 1H), 8.01 (dd,  $J = 16.0, 8.4$  Hz, 2H), 7.95 (d,  $J = 8.0$  Hz, 1H), 7.89 (d,  $J = 8.5$  Hz, 1H), 7.69 (d,  $J = 7.7$  Hz, 1H), 7.65 (d,  $J = 7.4$  Hz, 1H), 7.27 (d,  $J = 5.2$  Hz, 3H), 7.22 (s, 2H), 5.45 (s, 1H), 4.00 (s, 1H), 3.64 (t,  $J = 9.9$  Hz, 1H), 3.31 (dd,  $J = 14.0, 6.5$  Hz, 1H), 3.25 (dd,  $J = 14.0, 6.6$  Hz, 1H), 3.10 (d,  $J = 3.2$  Hz, 1H), 2.15 (s, 1H), 1.78 (s, 1H), 1.59 (s, 3H).  $^{13}\text{C}$  NMR (151 MHz,  $\text{CDCl}_3$ )  $\delta$  171.14, 141.96, 138.76, 136.52, 135.39, 132.23, 129.90, 129.82, 129.51, 129.46, 128.82, 128.41, 128.07, 127.94, 125.73, 122.49, 118.53, 61.06, 42.10, 30.56, 30.07, 25.11.

HRMS (ESI,  $m/z$ ): Calcd. For  $\text{C}_{24}\text{H}_{24}\text{NO}_3\text{S}$   $[\text{M}+\text{H}]^+$  406.1471, found: 406.1470.

**1-(4-((ethylsulfonyl)methyl)-6-phenyl-3,4-dihydropyridin-1(2H)-yl)ethan-1-one (4k)**

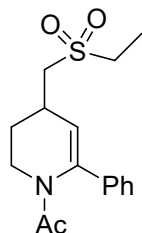

White solid; mp 96.2-97.3 °C; <sup>1</sup>H NMR (600 MHz, CDCl<sub>3</sub>) δ 7.34 (s, 5H), 5.53 (s, 1H), 4.05 (s, 1H), 3.72 (t, *J* = 10.3 Hz, 1H), 3.22 (d, *J* = 3.1 Hz, 1H), 3.12 – 2.97 (m, 4H), 2.25 (s, 1H), 1.85 (s, 1H), 1.63 (s, 3H), 1.43 (t, *J* = 7.3 Hz, 3H). <sup>13</sup>C NMR (151 MHz, CDCl<sub>3</sub>) δ 171.19, 142.15, 138.82, 128.87, 128.47, 125.81, 118.43, 56.32, 48.81, 42.06, 30.66, 29.08, 25.16, 6.75.

HRMS (ESI, *m/z*): Calcd. For C<sub>16</sub>H<sub>21</sub>NO<sub>3</sub>S [M+H]<sup>+</sup> 308.1315, found: 308.1319.

**1-(4-((cyclopropylsulfonyl)methyl)-6-phenyl-3,4-dihydropyridin-1(2H)-yl)ethan-1-one (4l)**

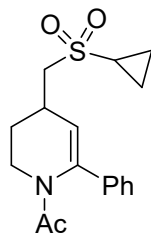

White solid; mp 68.2-69.4 °C; <sup>1</sup>H NMR (600 MHz, CDCl<sub>3</sub>) δ 7.33 (d, *J* = 10.8 Hz, 5H), 5.55 (s, 1H), 4.04 (s, 1H), 3.73 (dd, *J* = 15.1, 6.0 Hz, 1H), 3.25 – 3.16 (m, 2H), 3.12 (dd, *J* = 13.3, 7.0 Hz, 1H), 2.47 – 2.39 (m, 1H), 2.24 (s, 1H), 1.85 (s, 1H), 1.63 (s, 3H), 1.31 – 1.22 (m, 2H), 1.08 (dd, *J* = 7.8, 1.8 Hz, 2H). <sup>13</sup>C NMR (151 MHz, CDCl<sub>3</sub>) δ 171.20, 142.02, 138.85, 128.87, 128.44, 125.79, 118.63, 58.41, 42.07, 30.64, 30.54, 29.41, 25.13, 4.93, 4.91.

HRMS (ESI, *m/z*): Calcd. For C<sub>17</sub>H<sub>21</sub>NO<sub>3</sub>S [M+H]<sup>+</sup> 342.1134, found: 342.1144.

***N*-(5-oxo-5-phenyl-3-(tosylmethyl)pentyl)acetamide (4aa)**

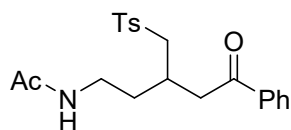

Amorphous solid;  $^1\text{H}$  NMR (600 MHz,  $\text{CDCl}_3$ )  $\delta$  7.92 (dd,  $J = 4.4, 2.9$  Hz, 2H), 7.77 (d,  $J = 8.2$  Hz, 2H), 7.57 (t,  $J = 7.3$  Hz, 1H), 7.46 (dd,  $J = 9.3, 6.2$  Hz, 2H), 7.34 (d,  $J = 8.1$  Hz, 2H), 5.99 (s, 1H), 3.47 (dd,  $J = 17.9, 4.8$  Hz, 1H), 3.33 – 3.25 (m, 2H), 3.22 (dd,  $J = 14.3, 4.8$  Hz, 2H), 3.16 (dd,  $J = 17.9, 7.1$  Hz, 1H), 2.72 (s, 1H), 2.42 (d,  $J = 2.6$  Hz, 3H), 1.95 (t,  $J = 3.4$  Hz, 3H), 1.77 (ddt,  $J = 27.5, 13.9, 7.1$  Hz, 2H).  $^{13}\text{C}$  NMR (151 MHz,  $\text{CDCl}_3$ )  $\delta$  198.77, 170.30, 144.88, 136.65, 136.55, 133.48, 130.01, 128.70, 128.06, 127.88, 59.00, 41.81, 36.65, 33.52, 27.20, 23.25, 21.63.

HRMS (ESI,  $m/z$ ): Calcd. For  $\text{C}_{21}\text{H}_{25}\text{NO}_4\text{S}$   $[\text{M}+\text{H}]^+$  388.1577, found: 388.1587.

## 9. NMR spectra for the products

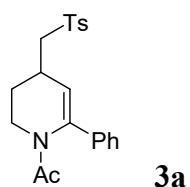



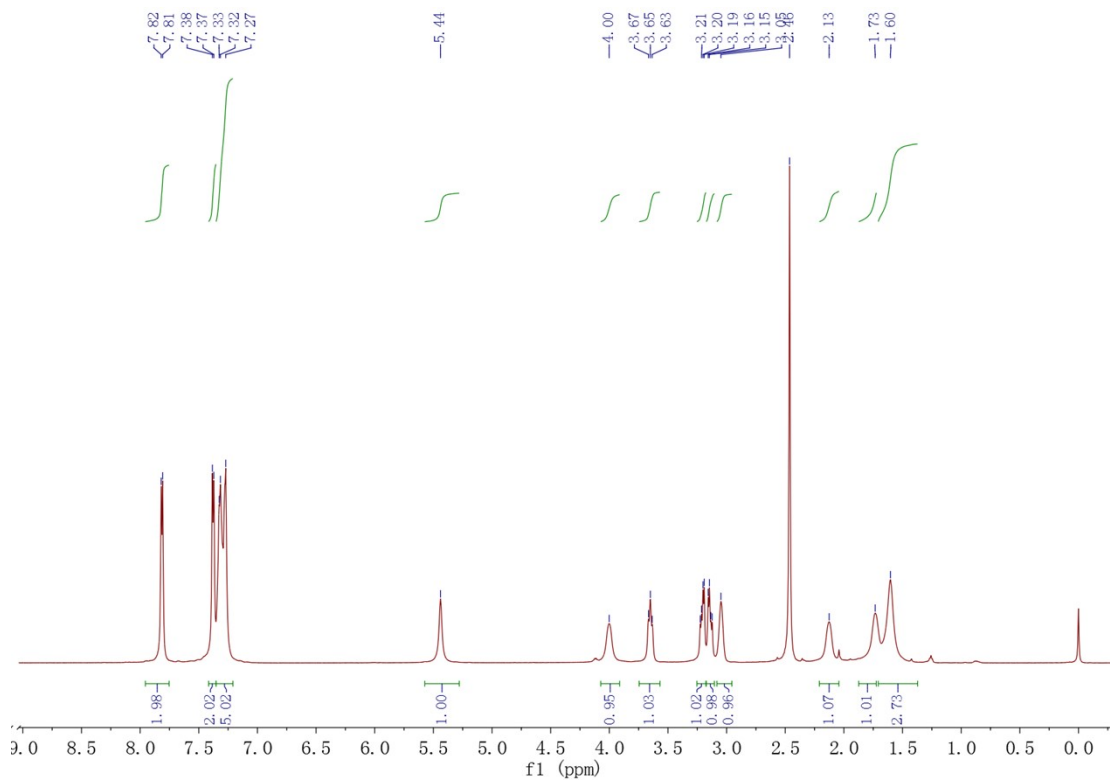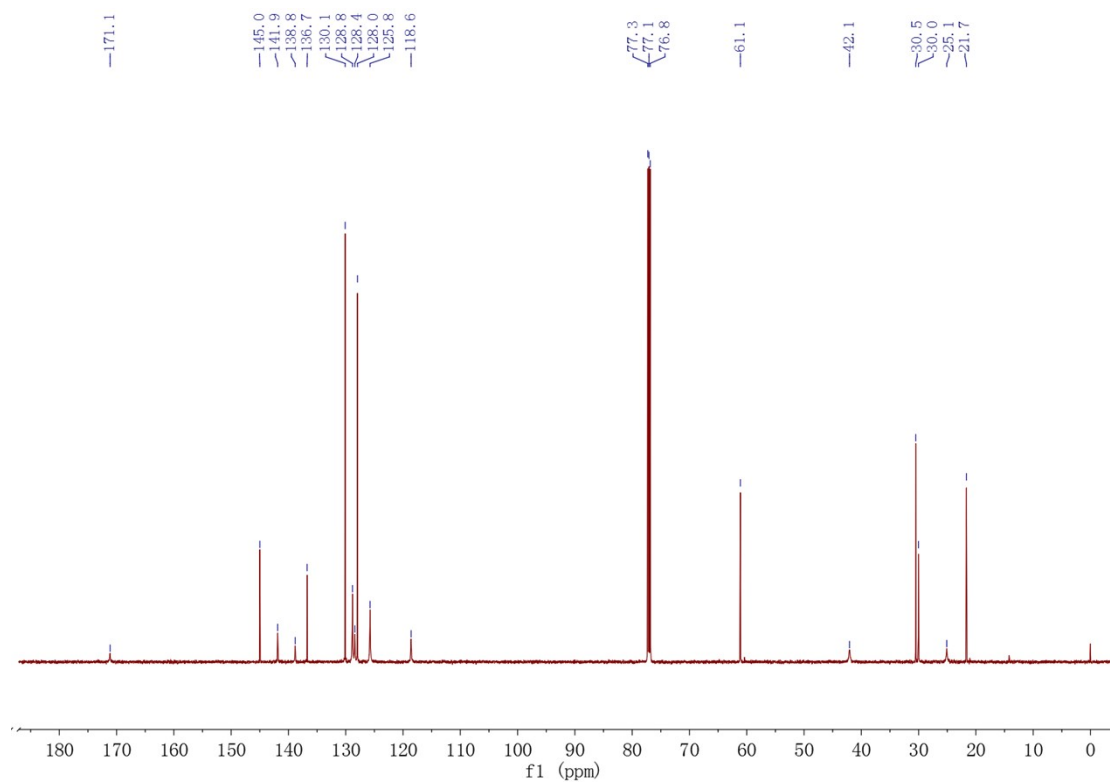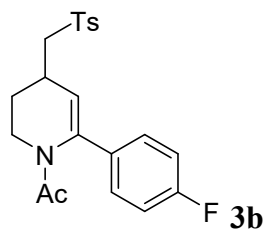

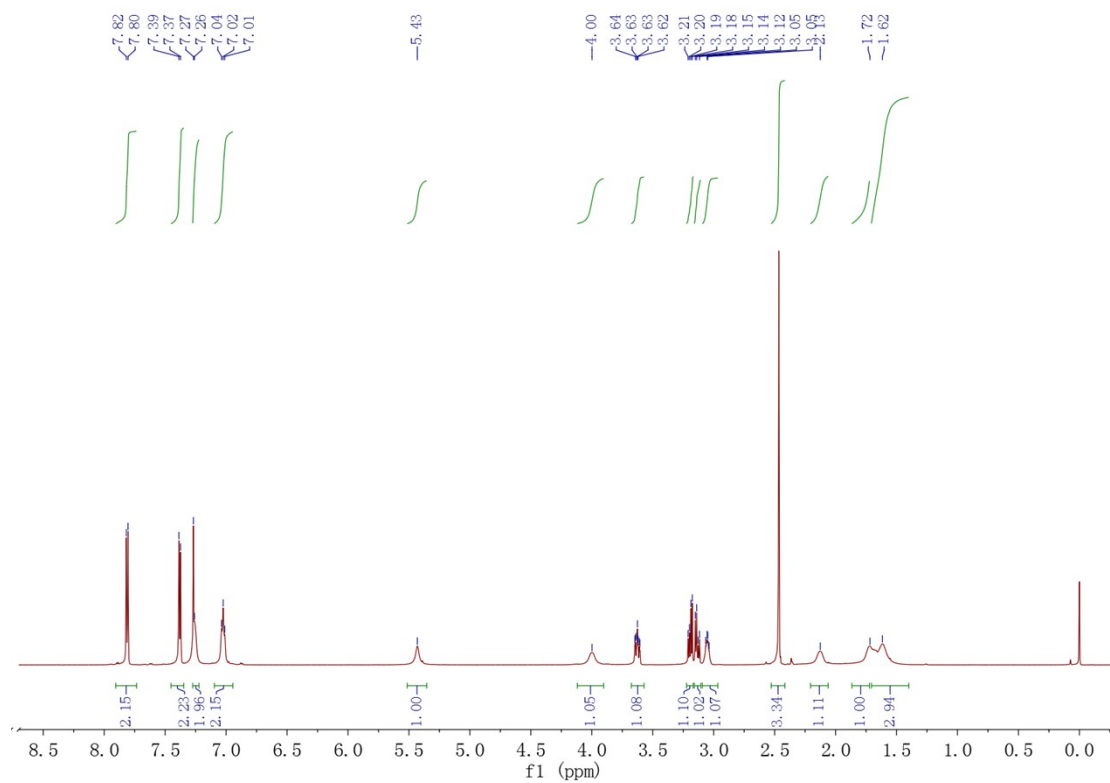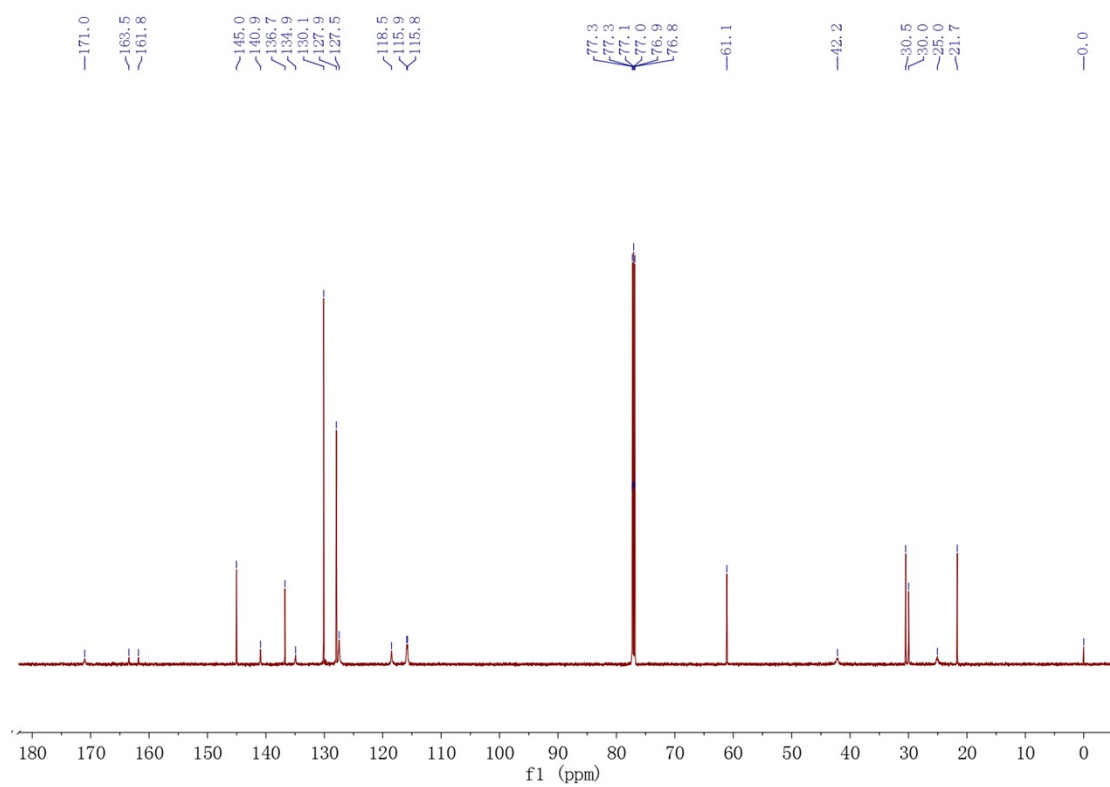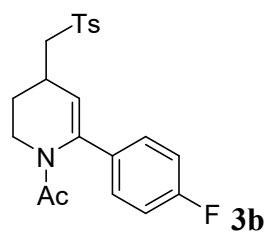

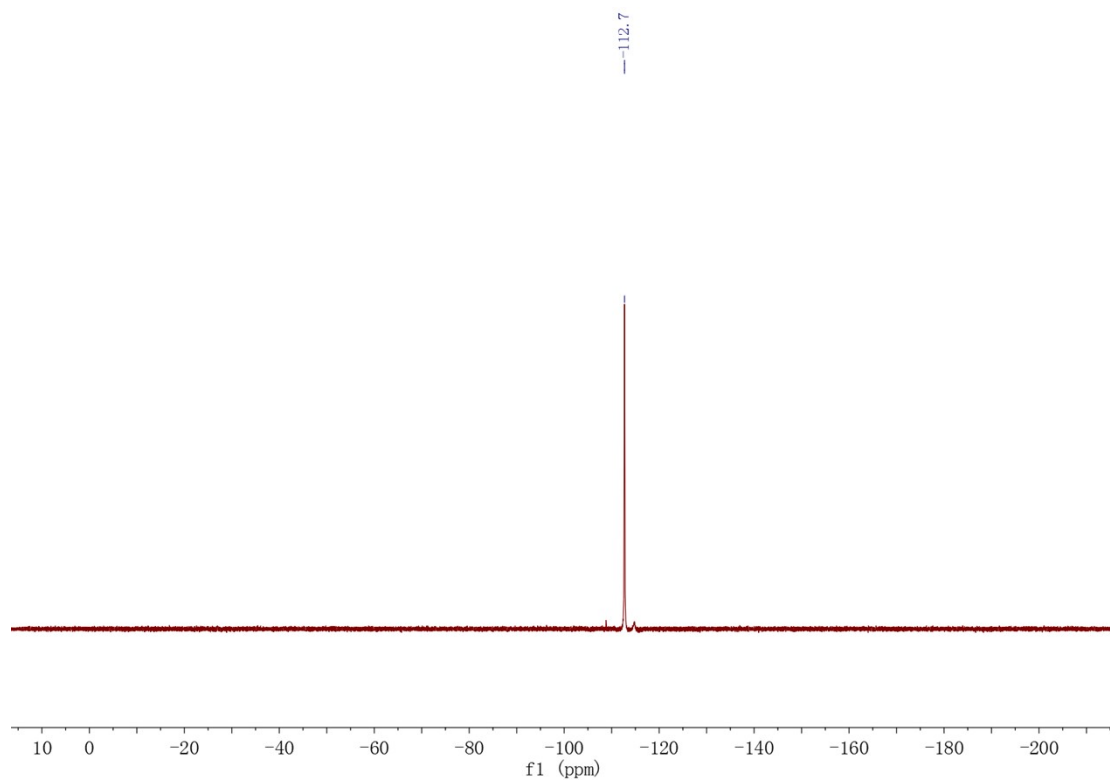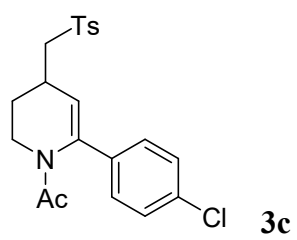

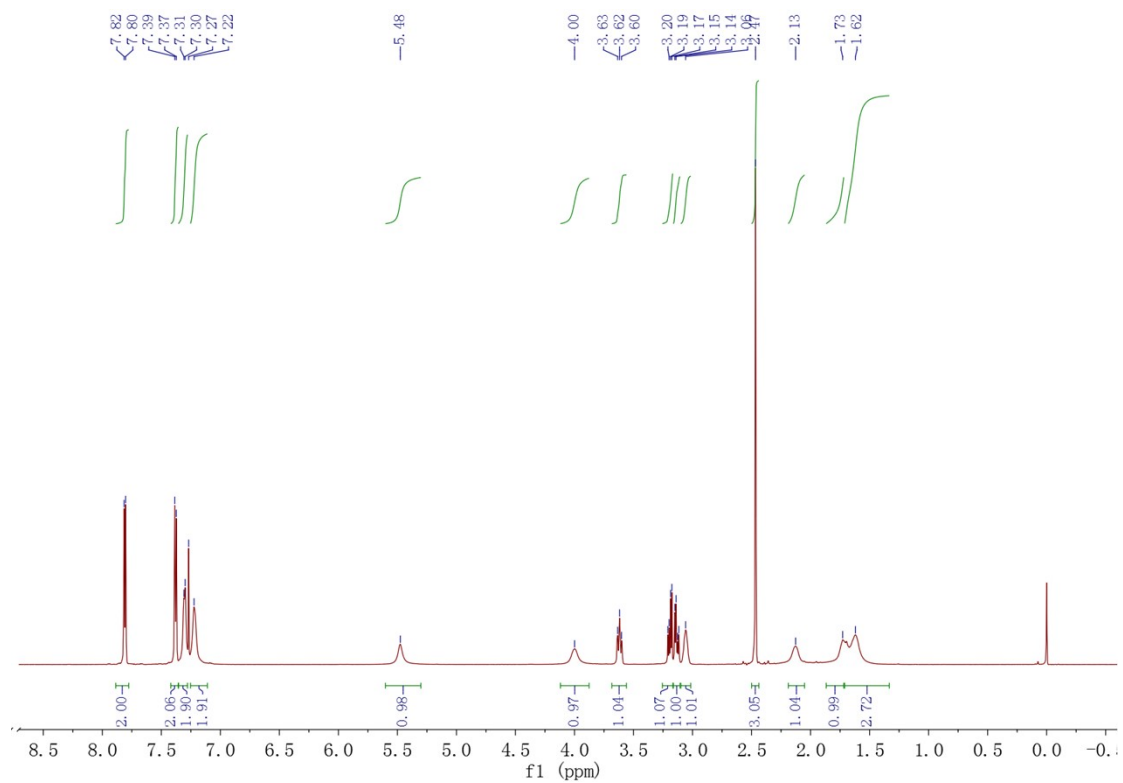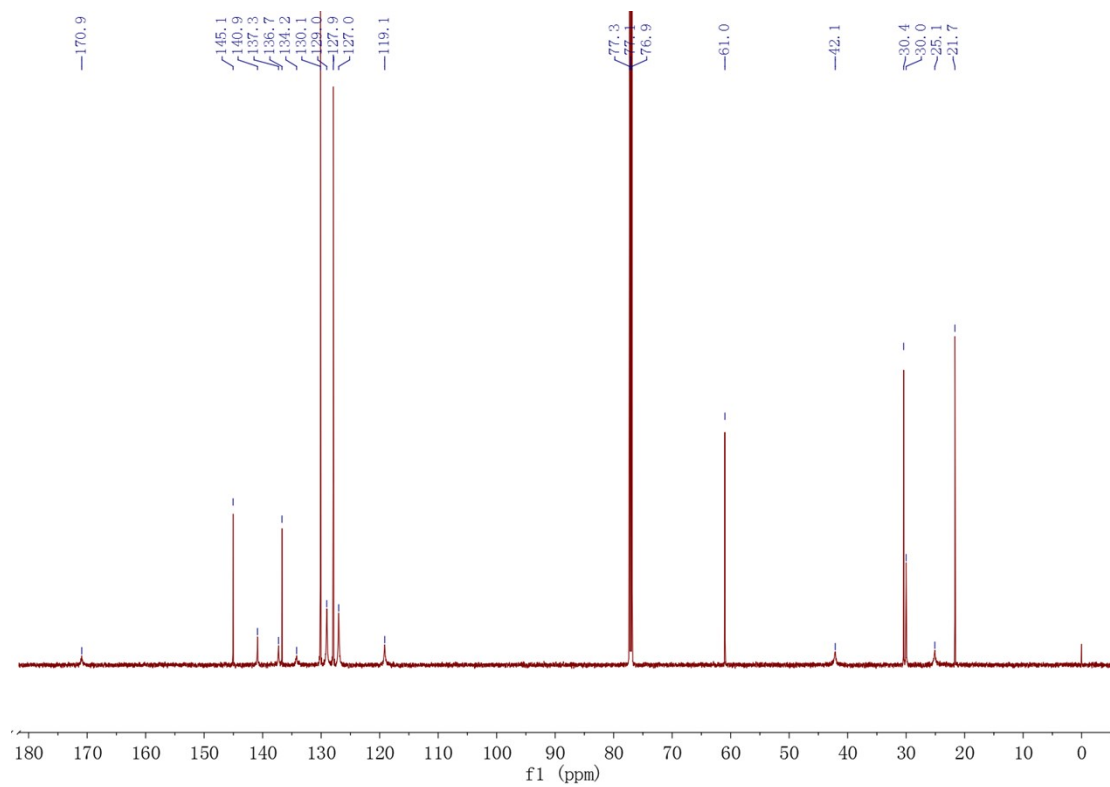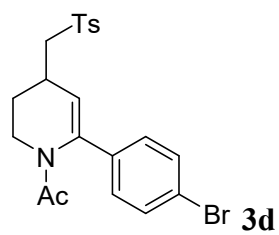

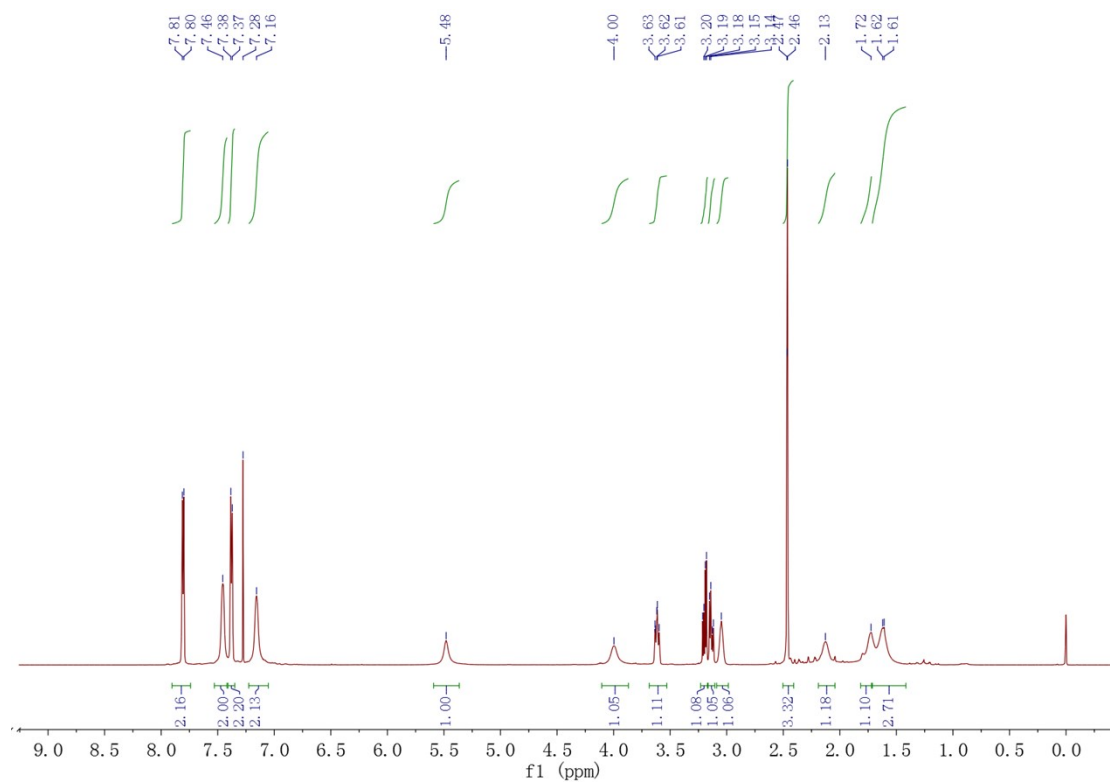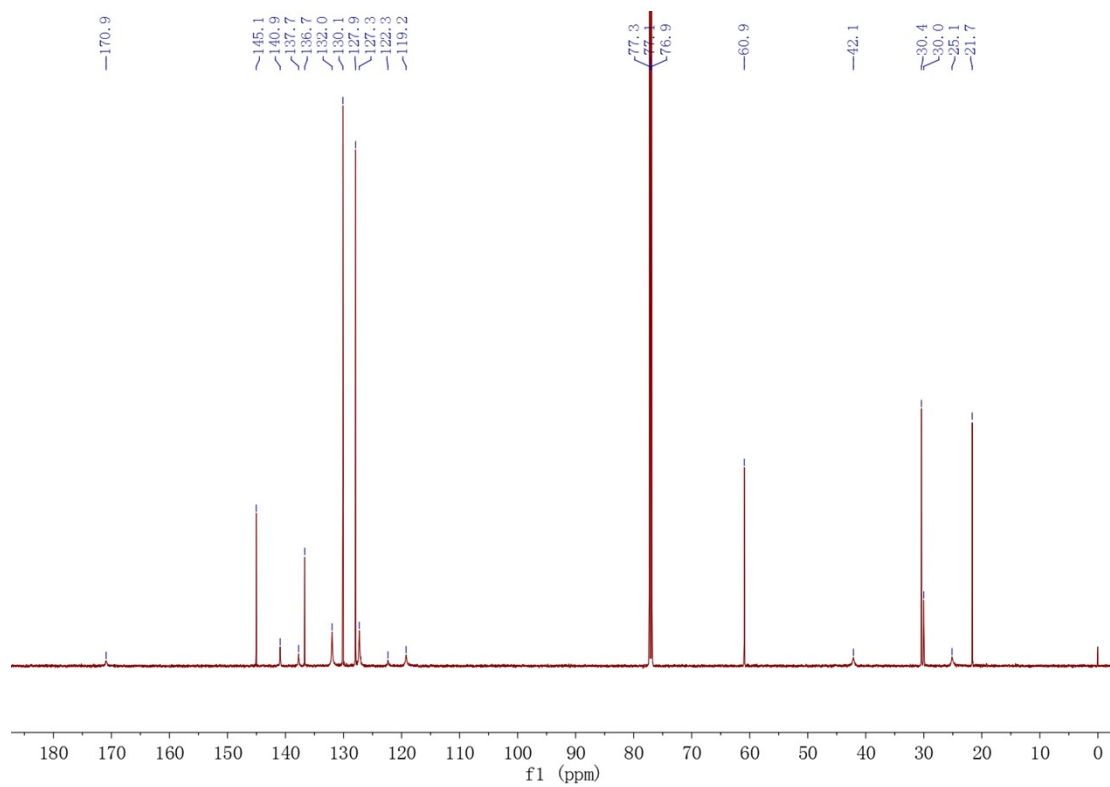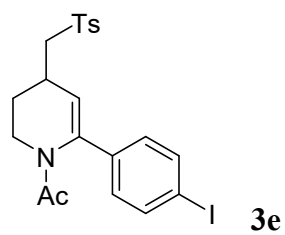

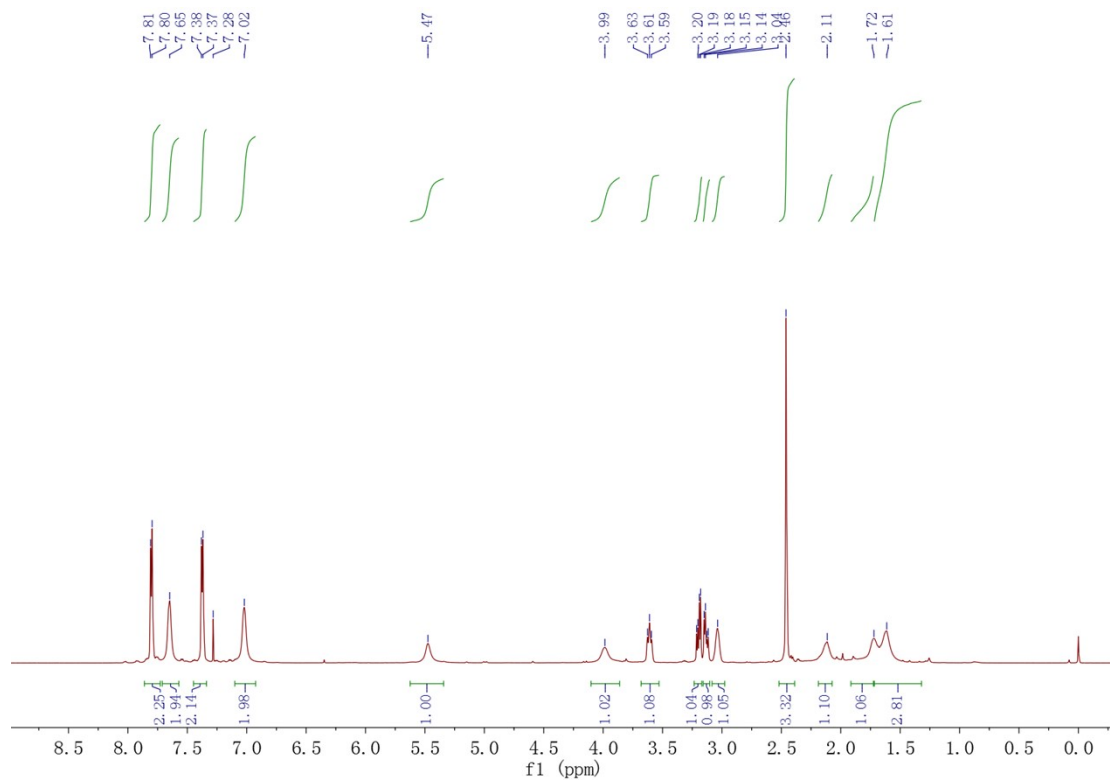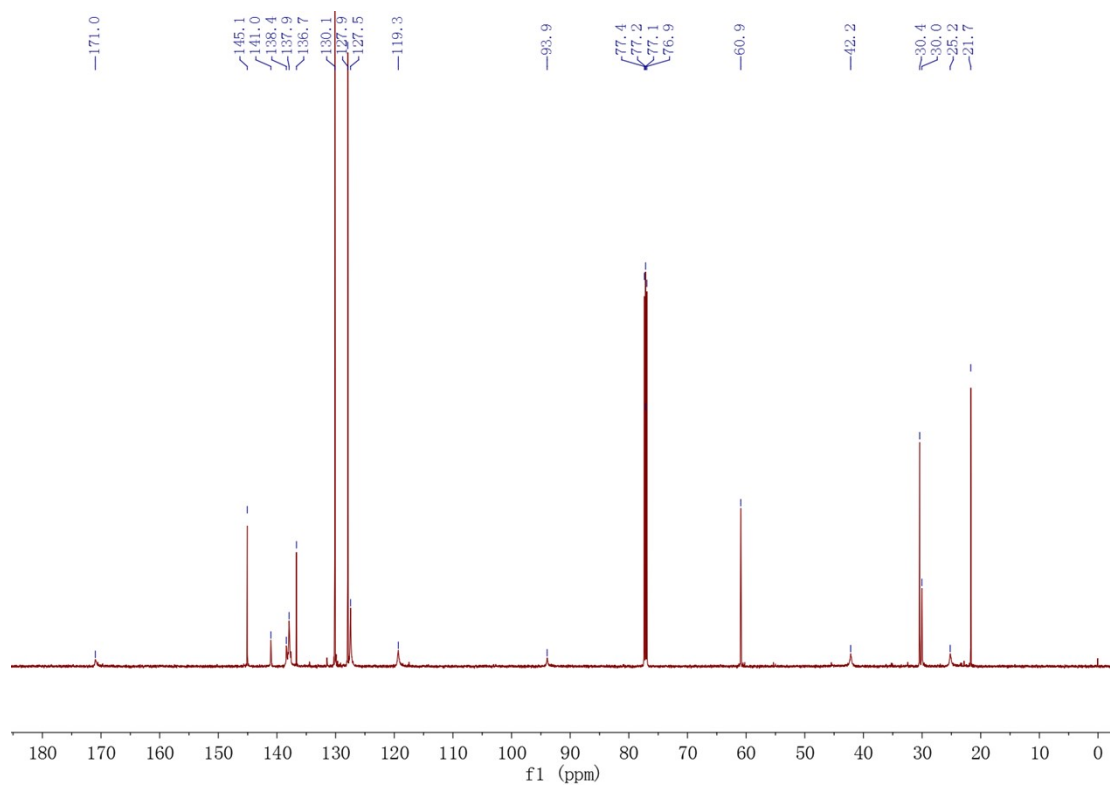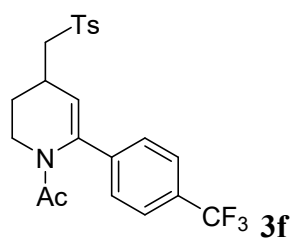

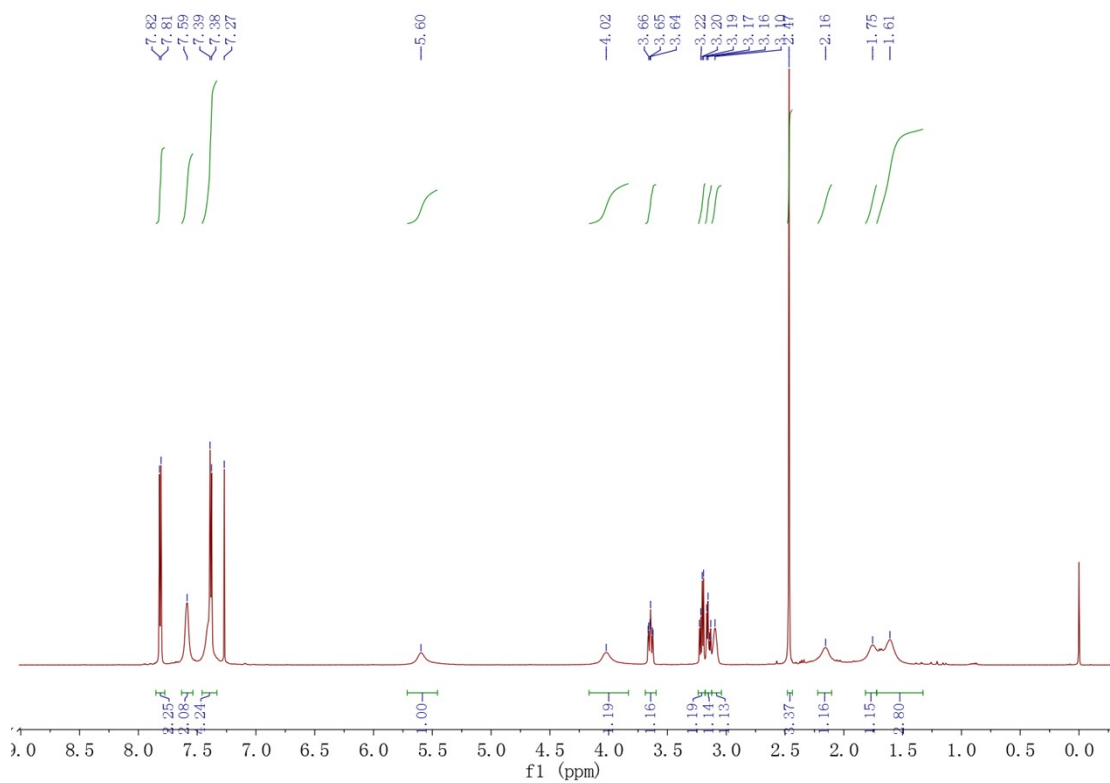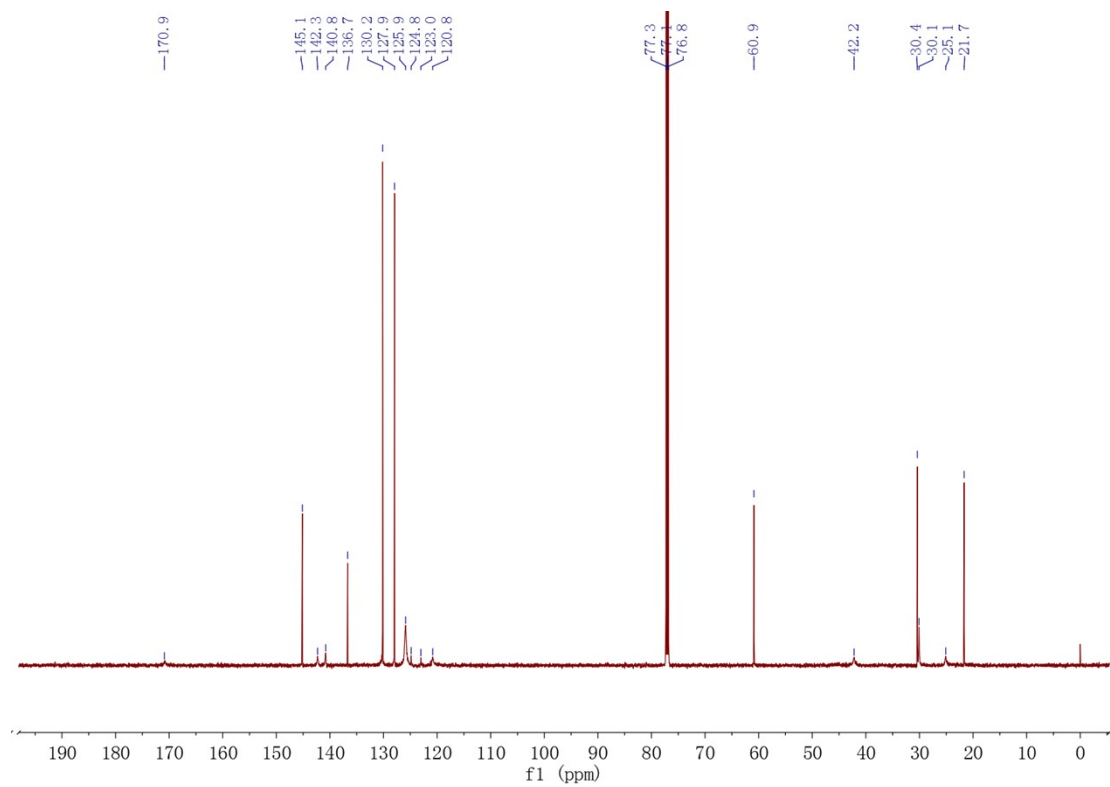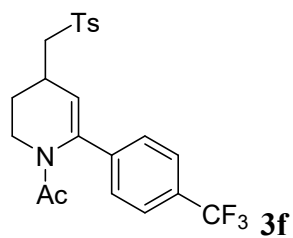

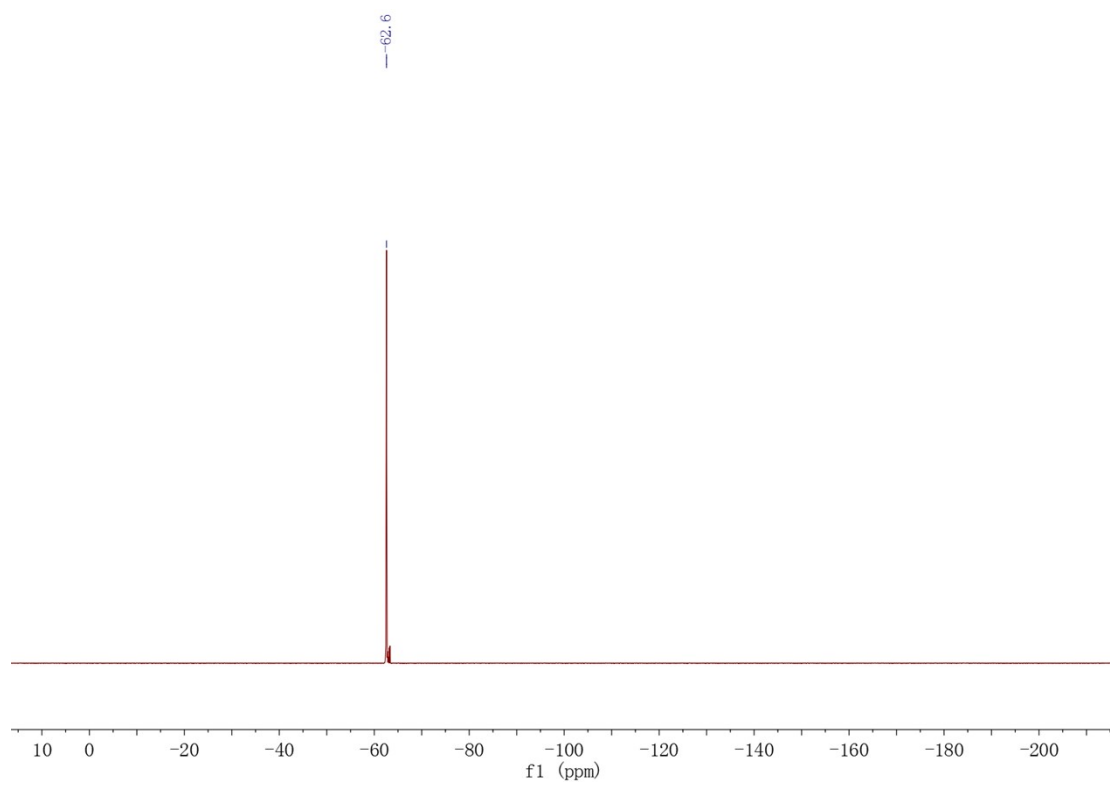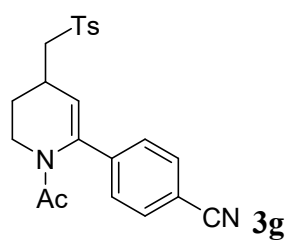



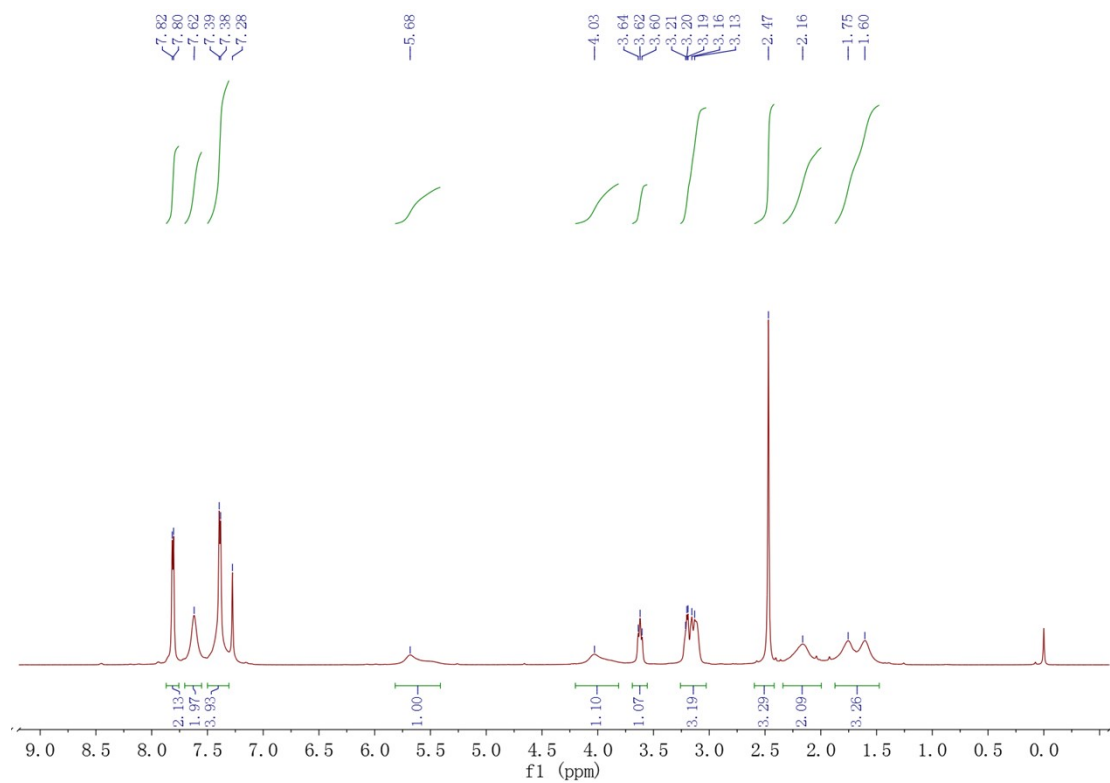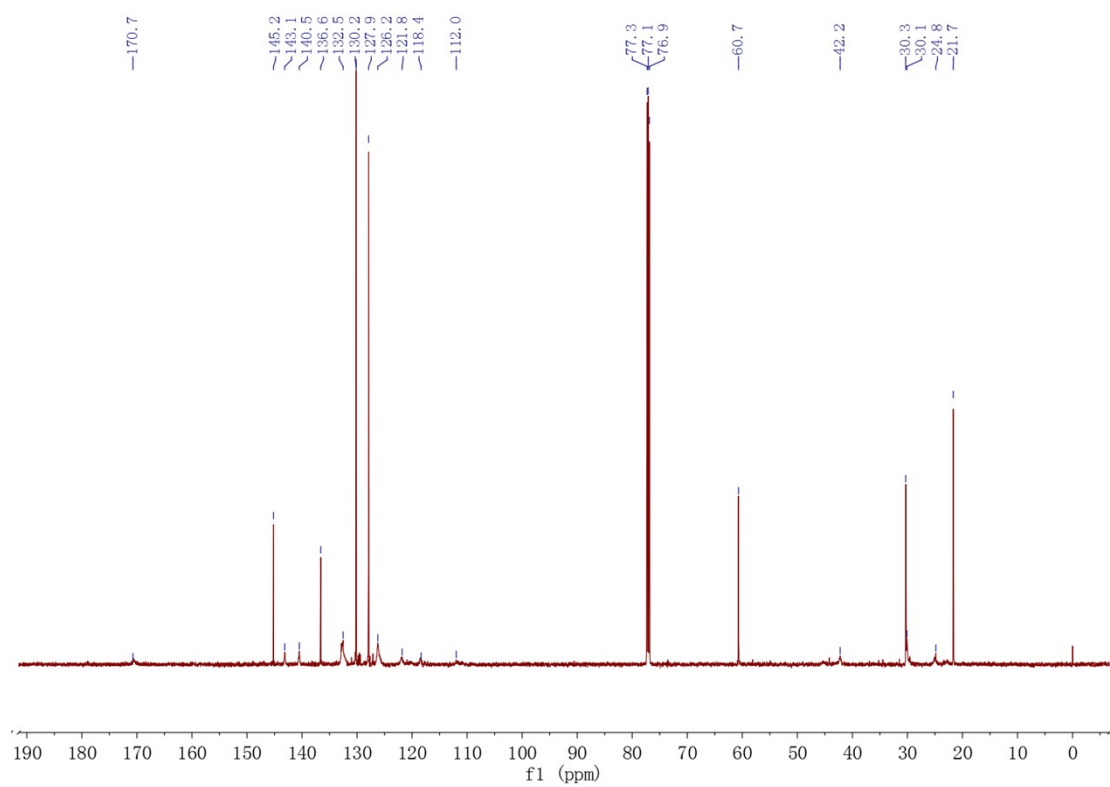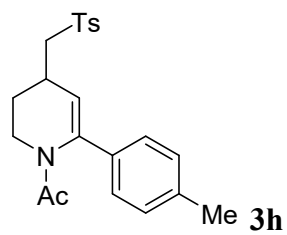

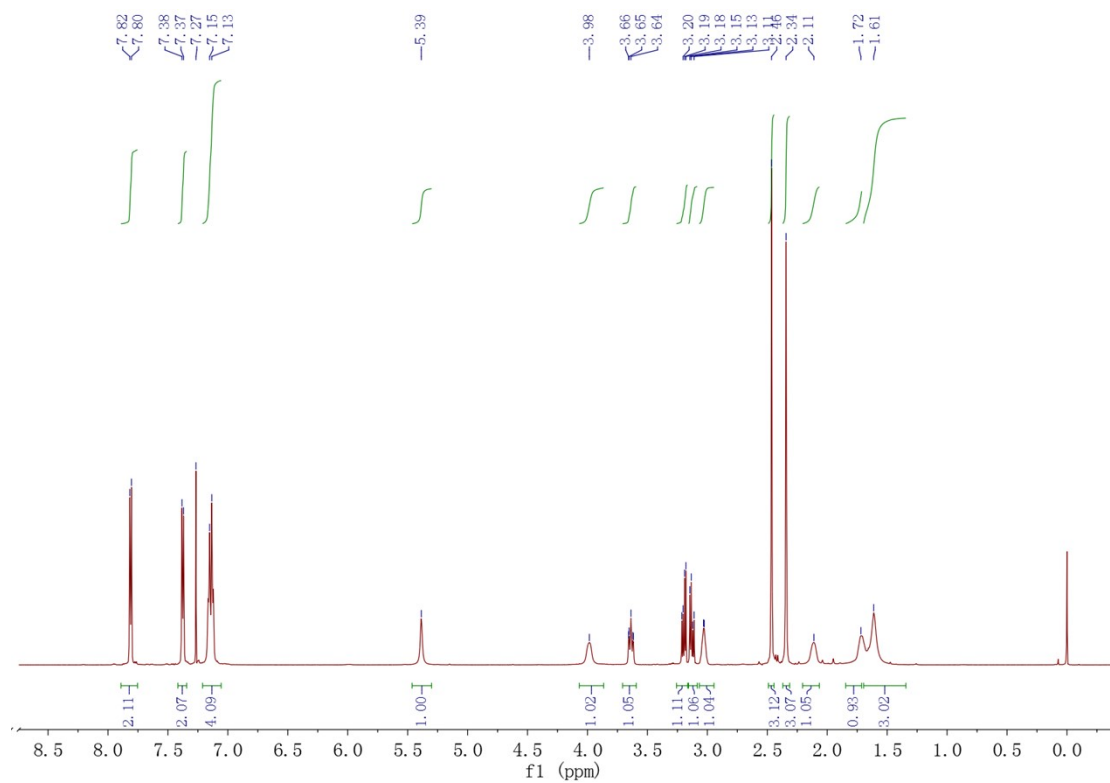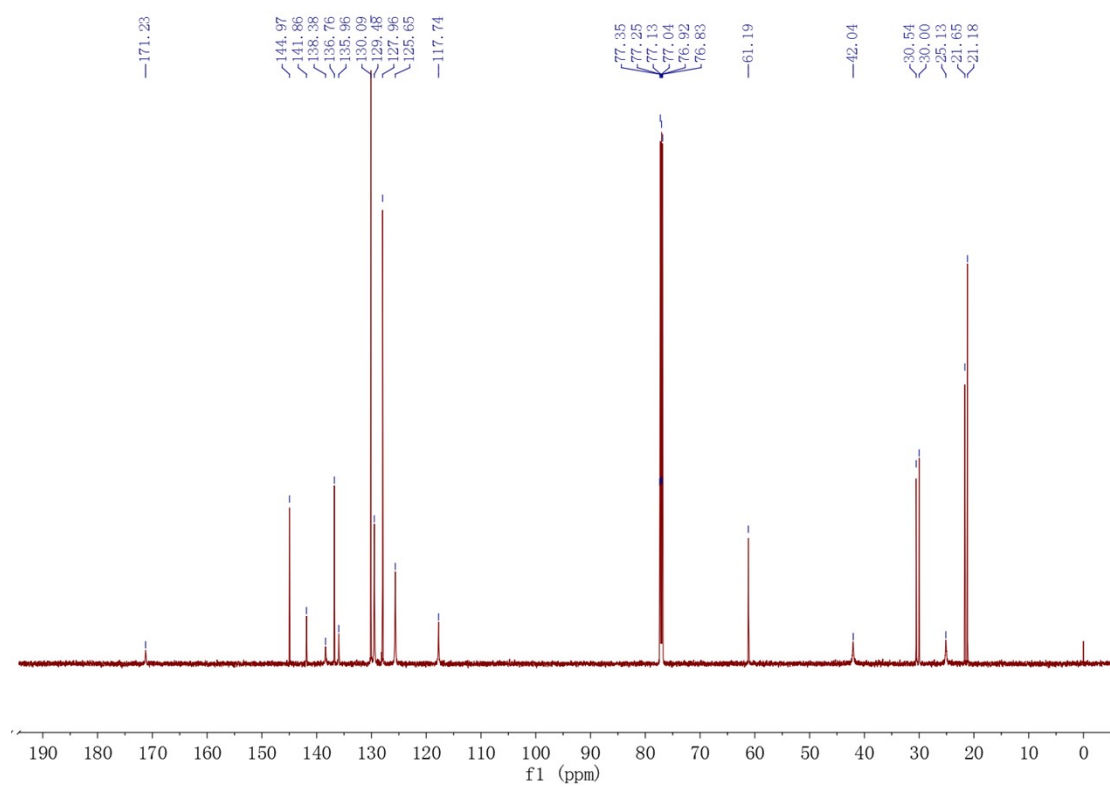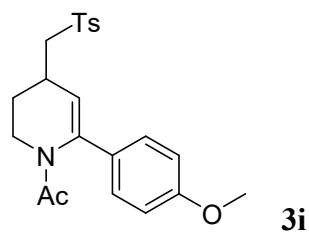

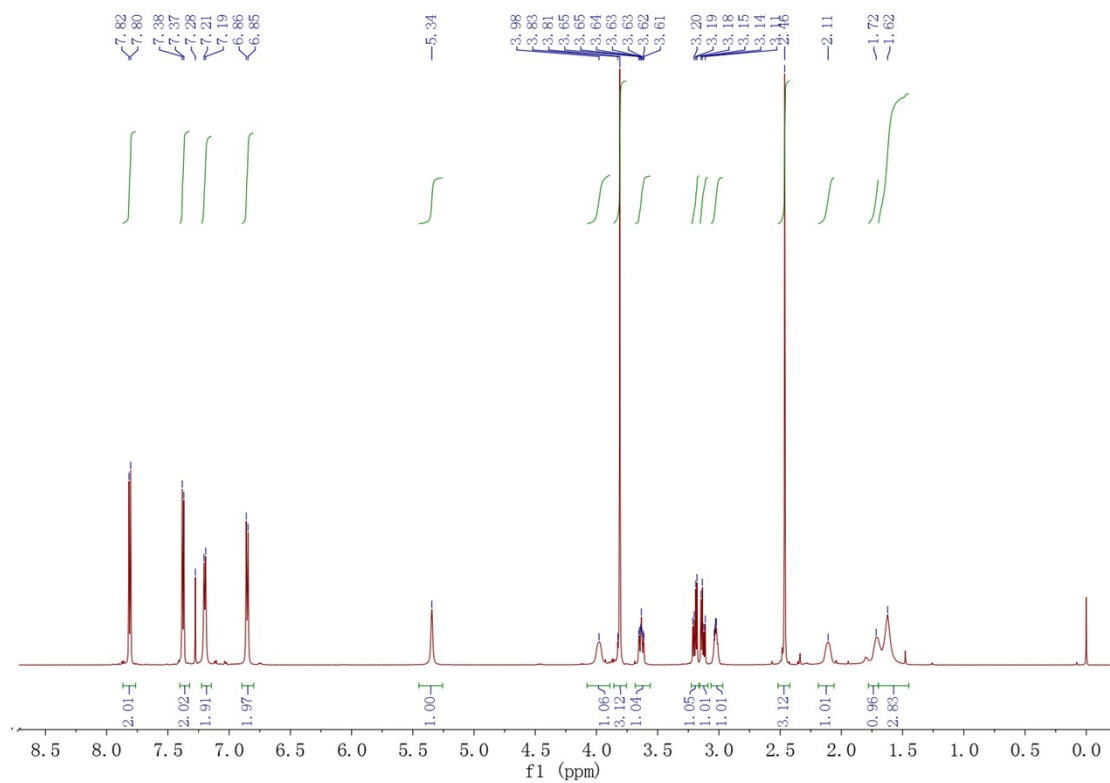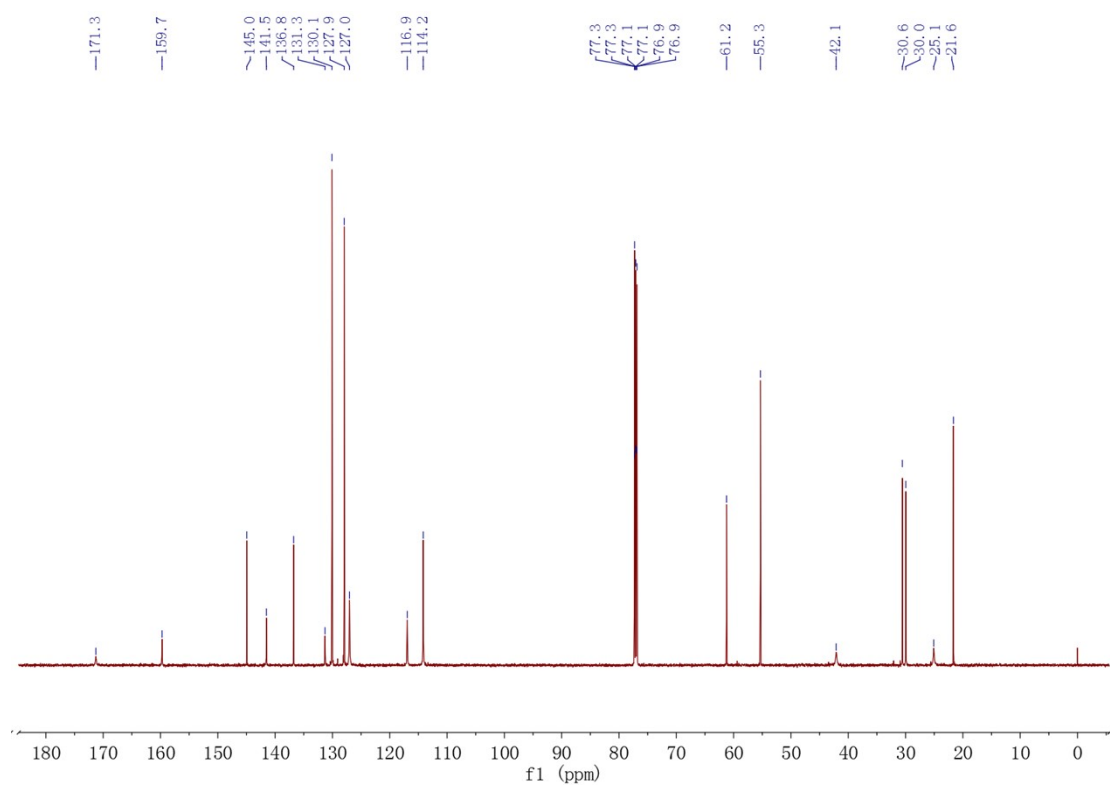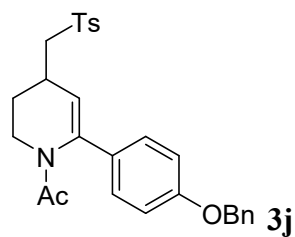

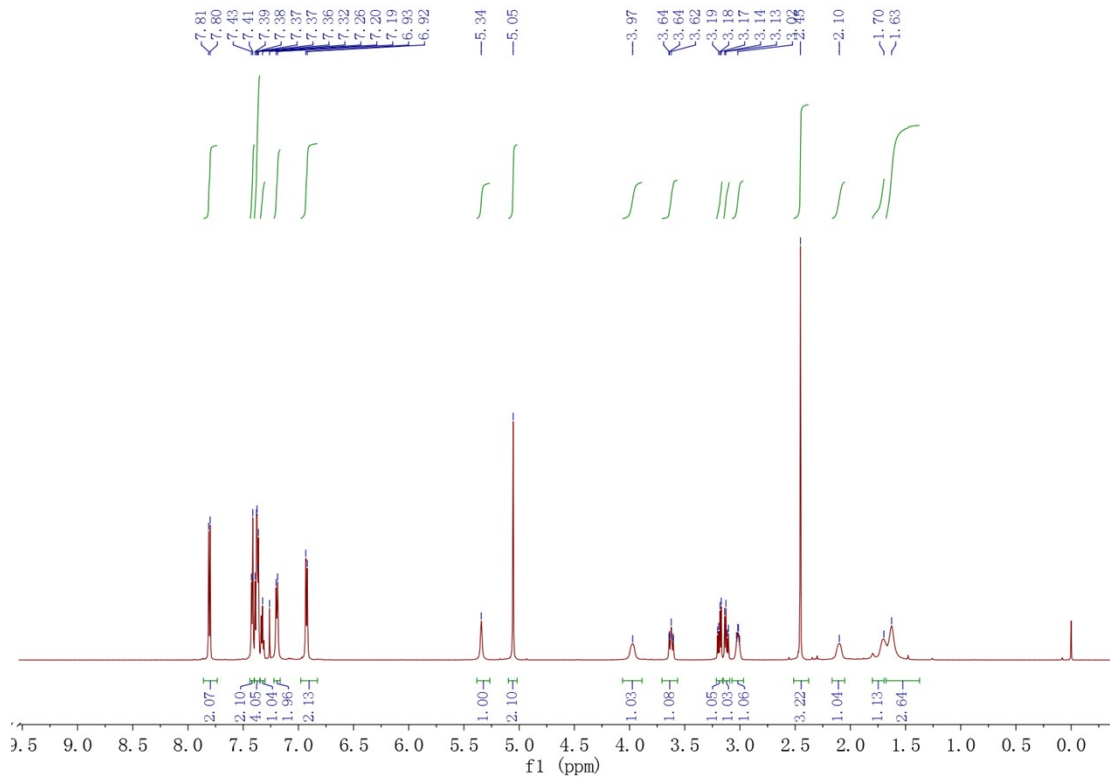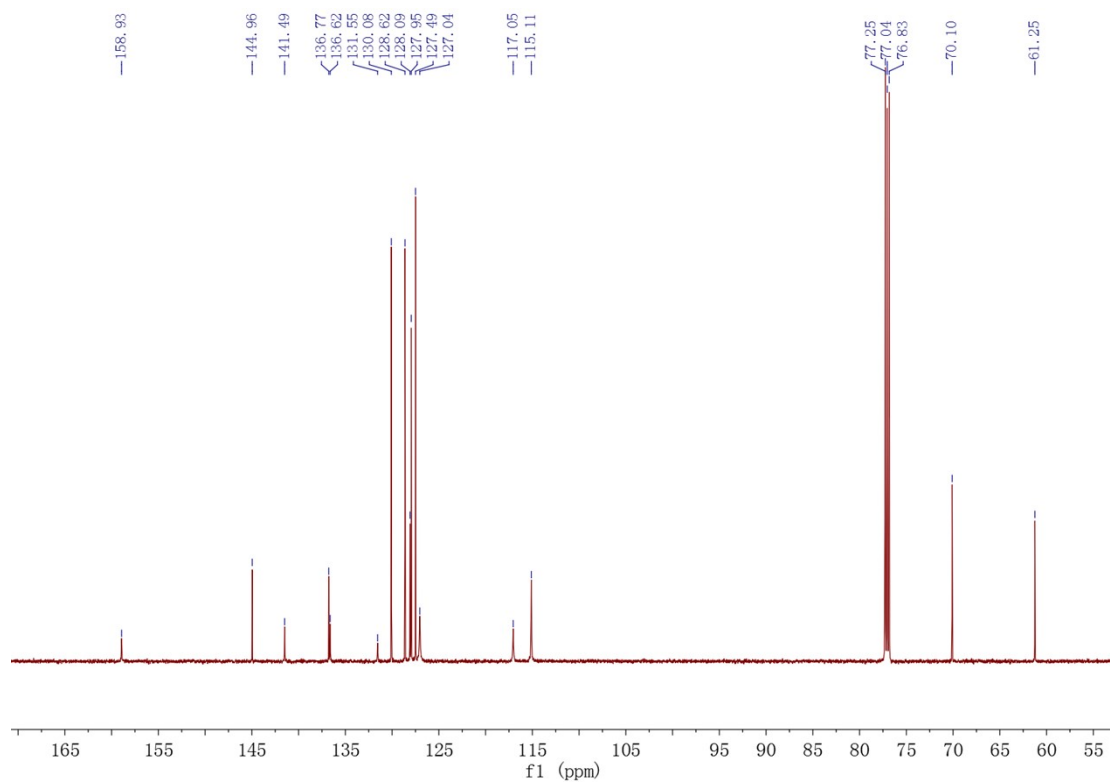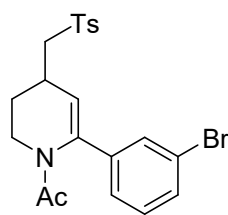

**3k**

wpl2-h

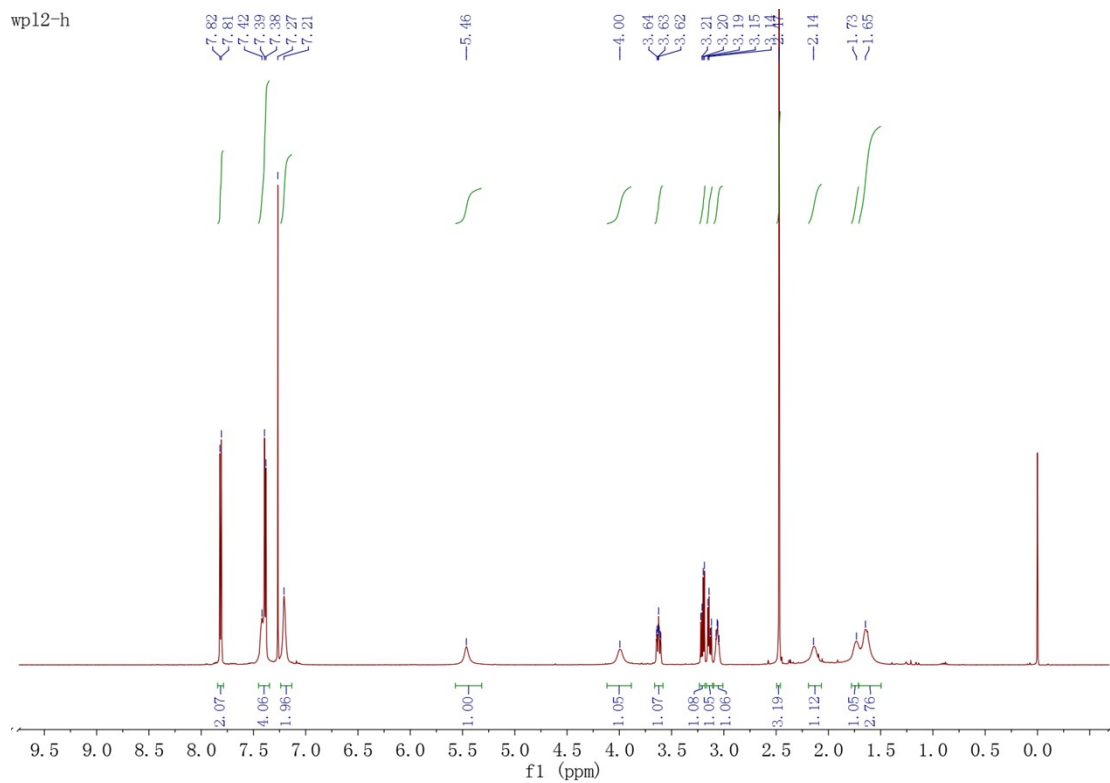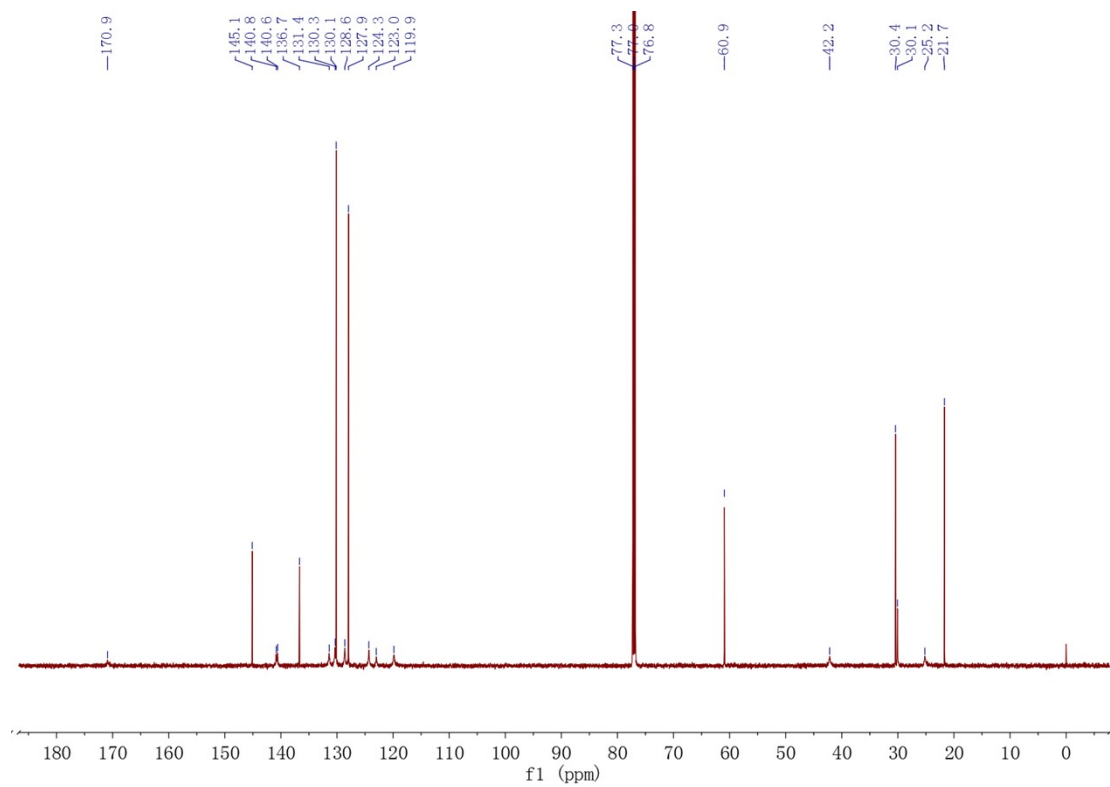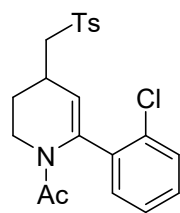

**31**

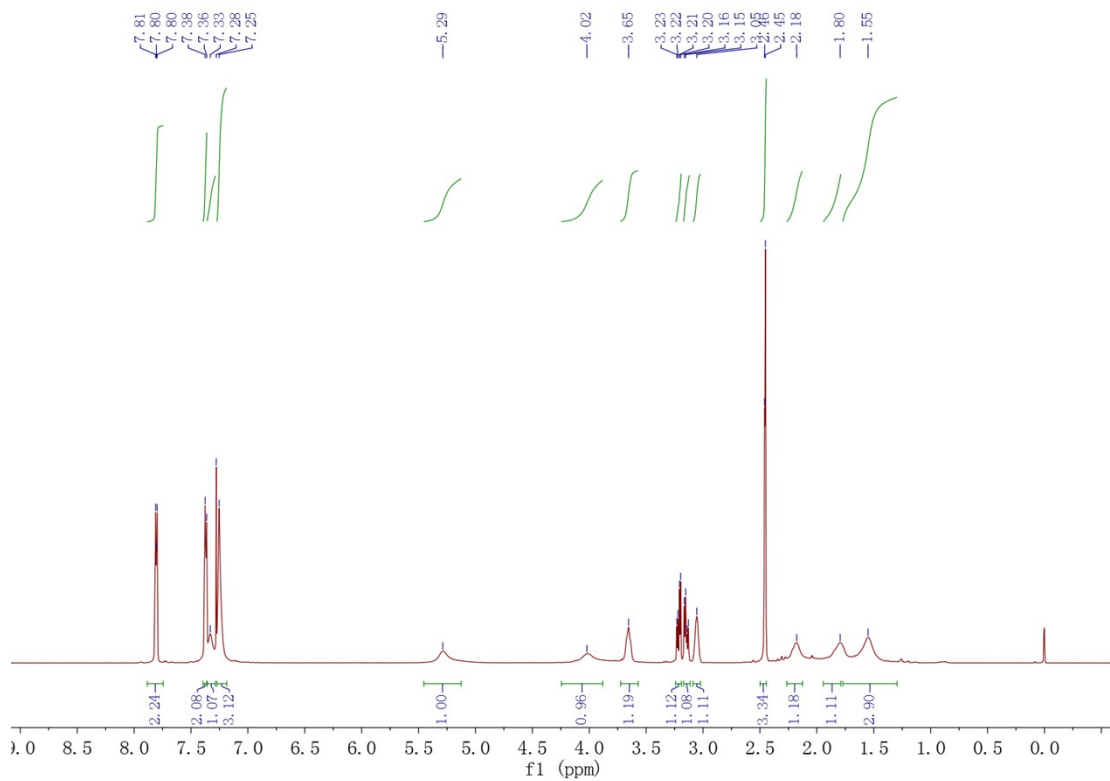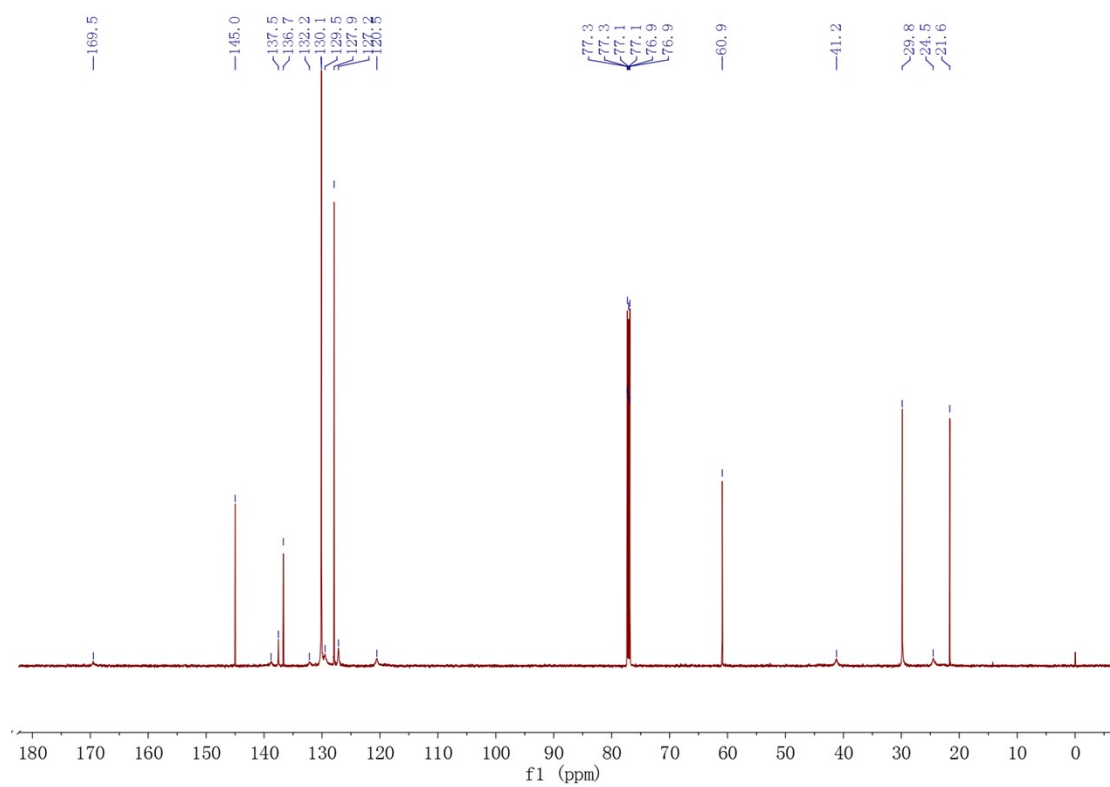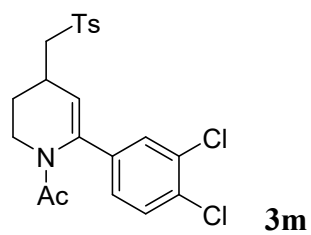

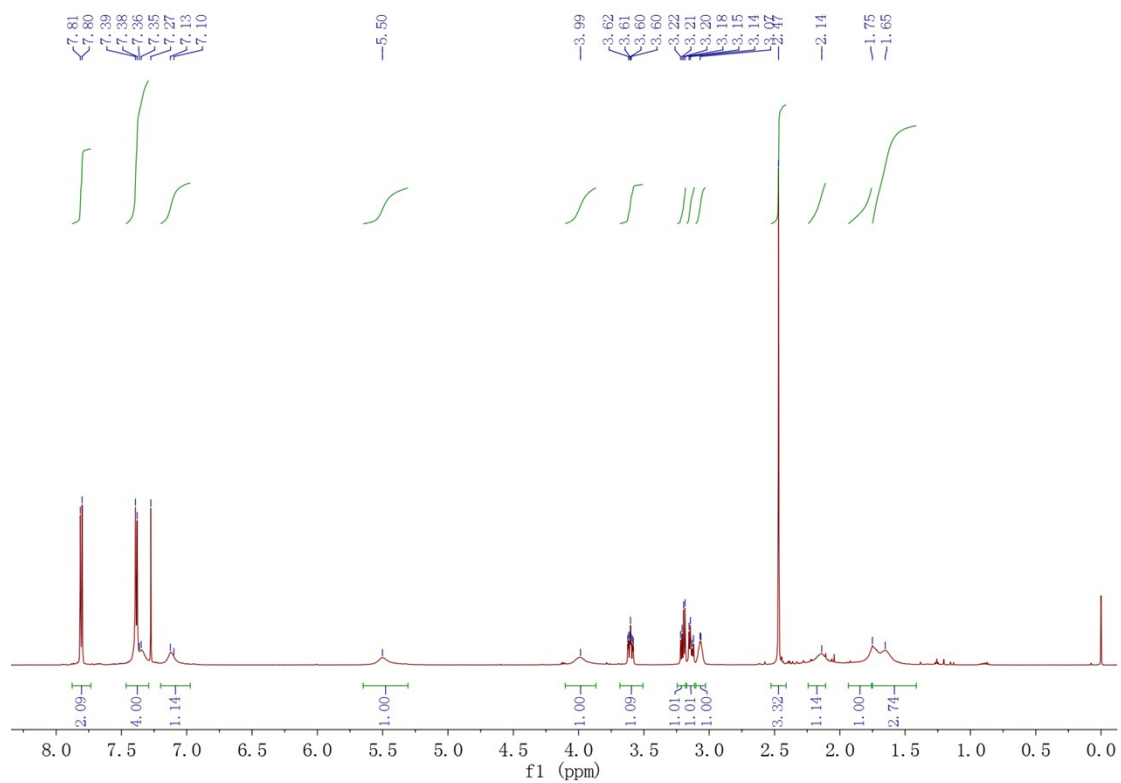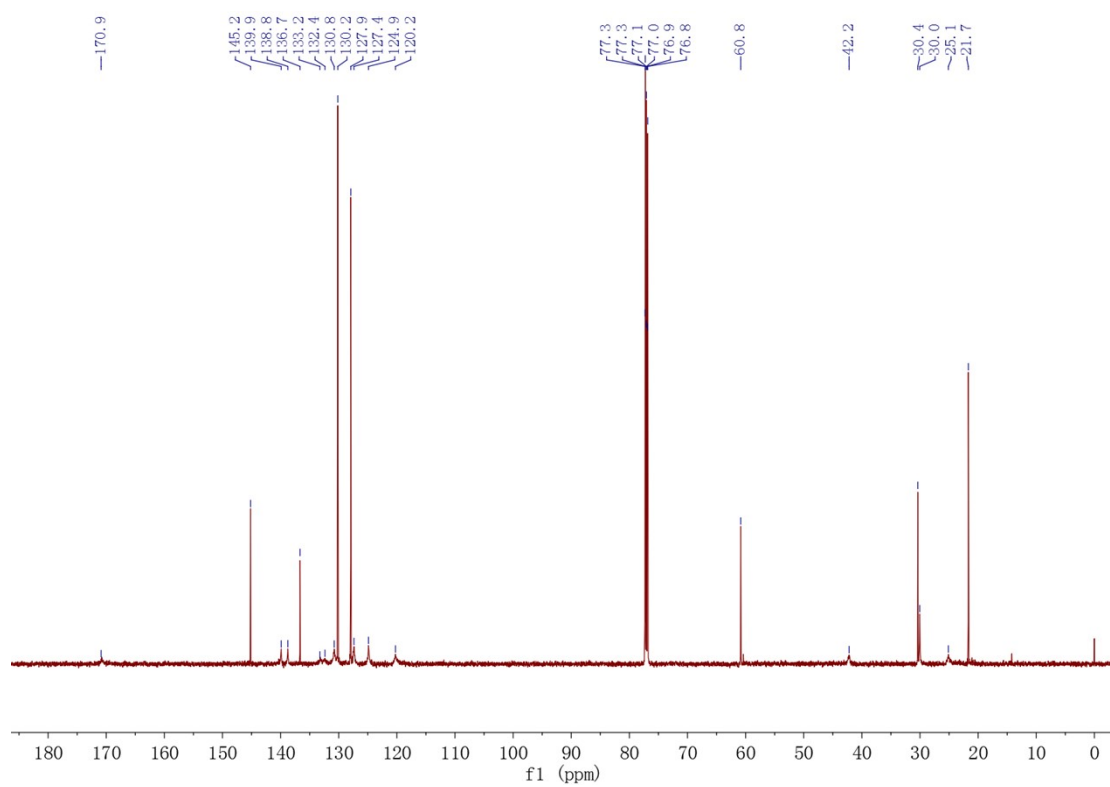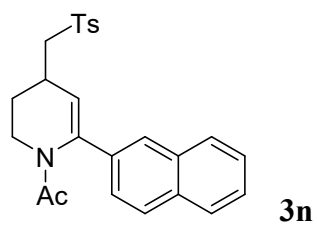

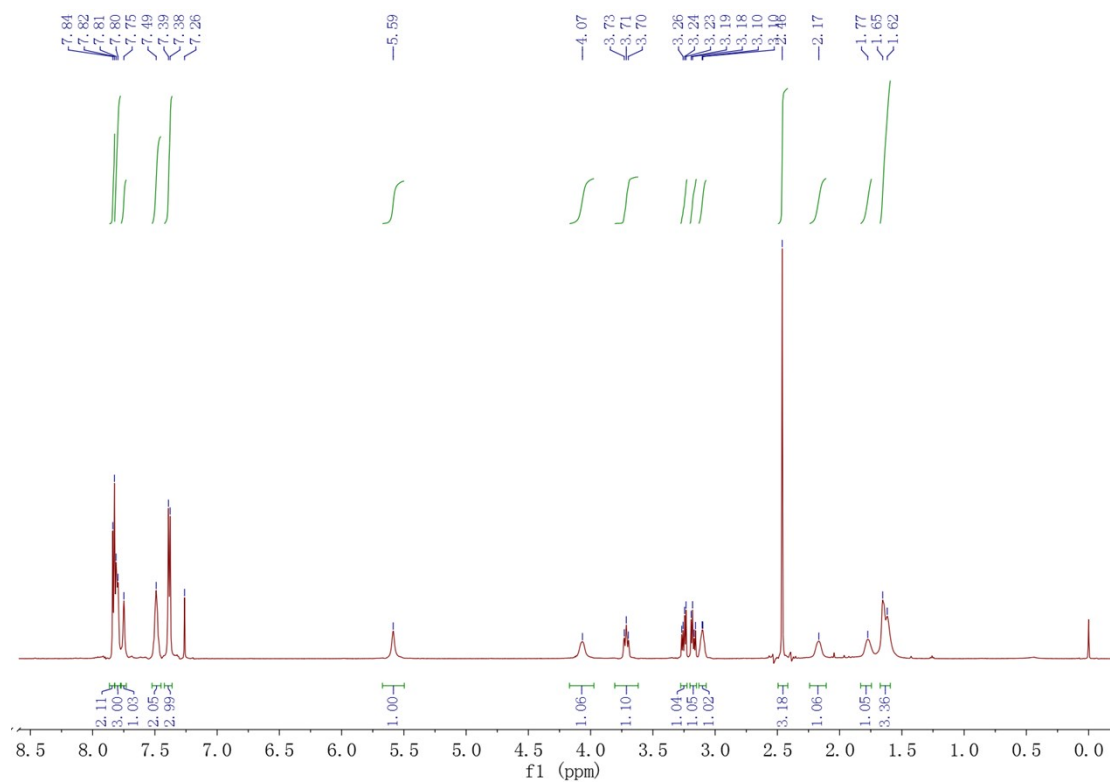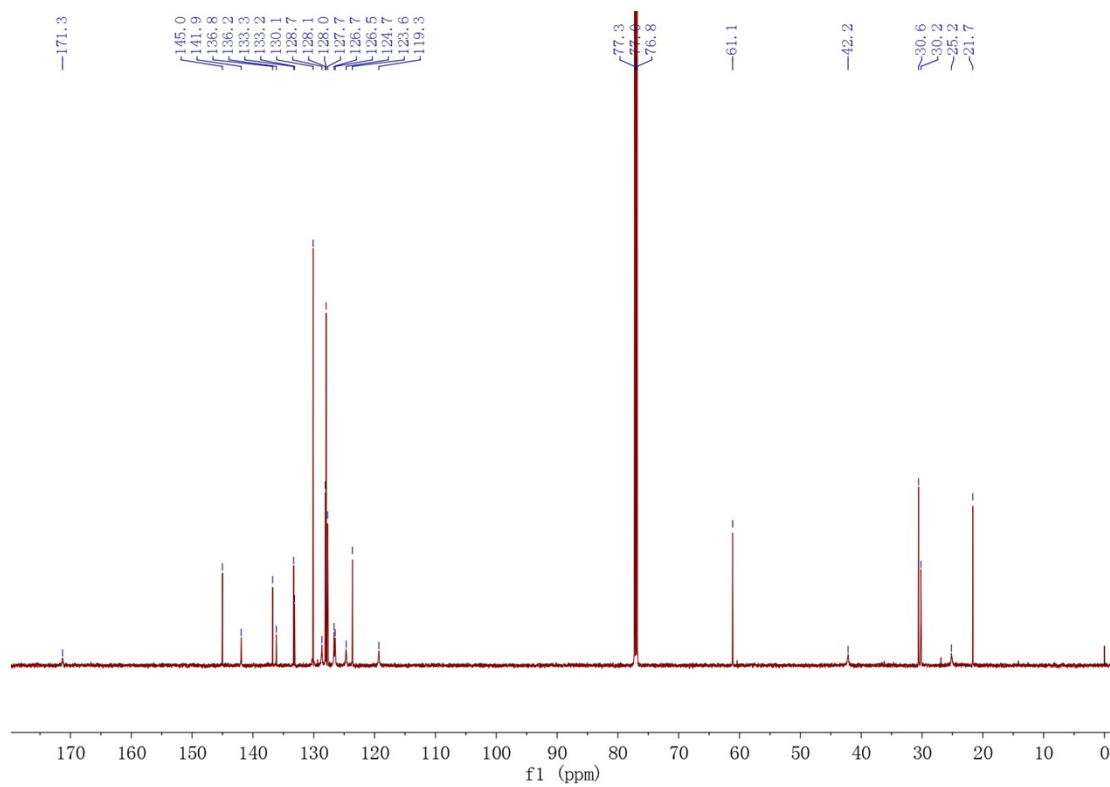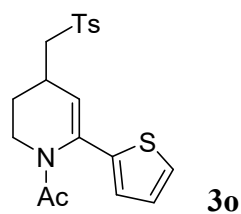



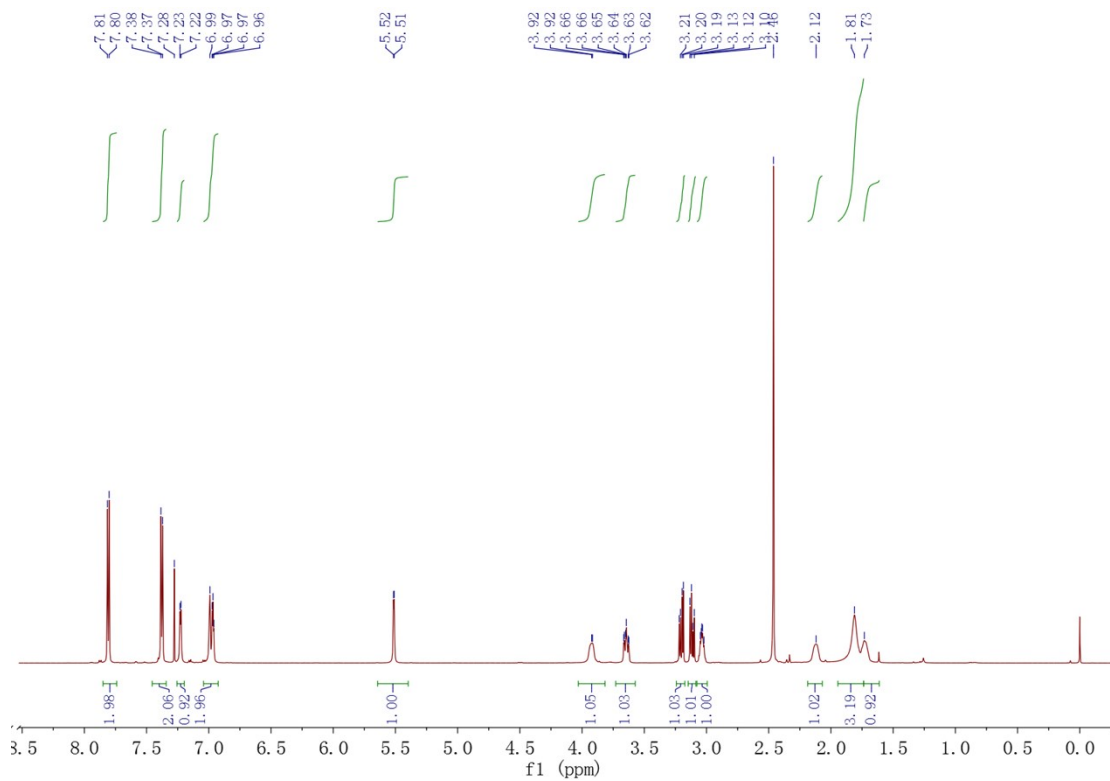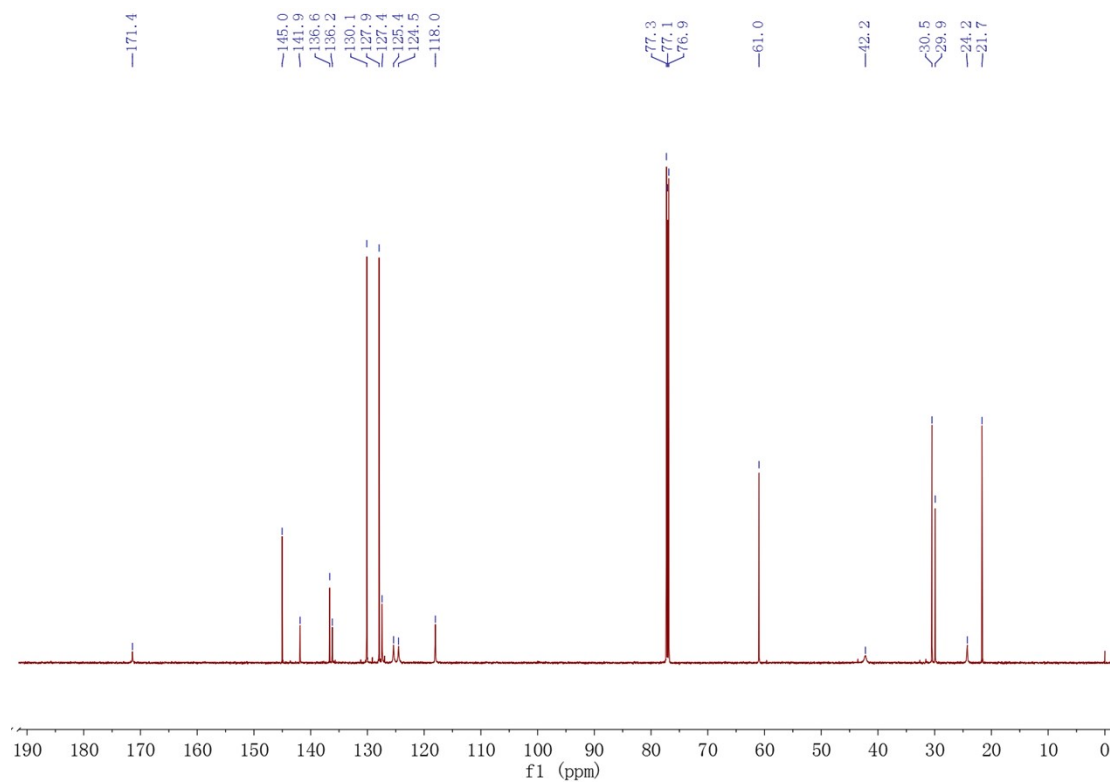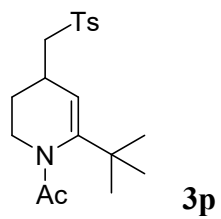

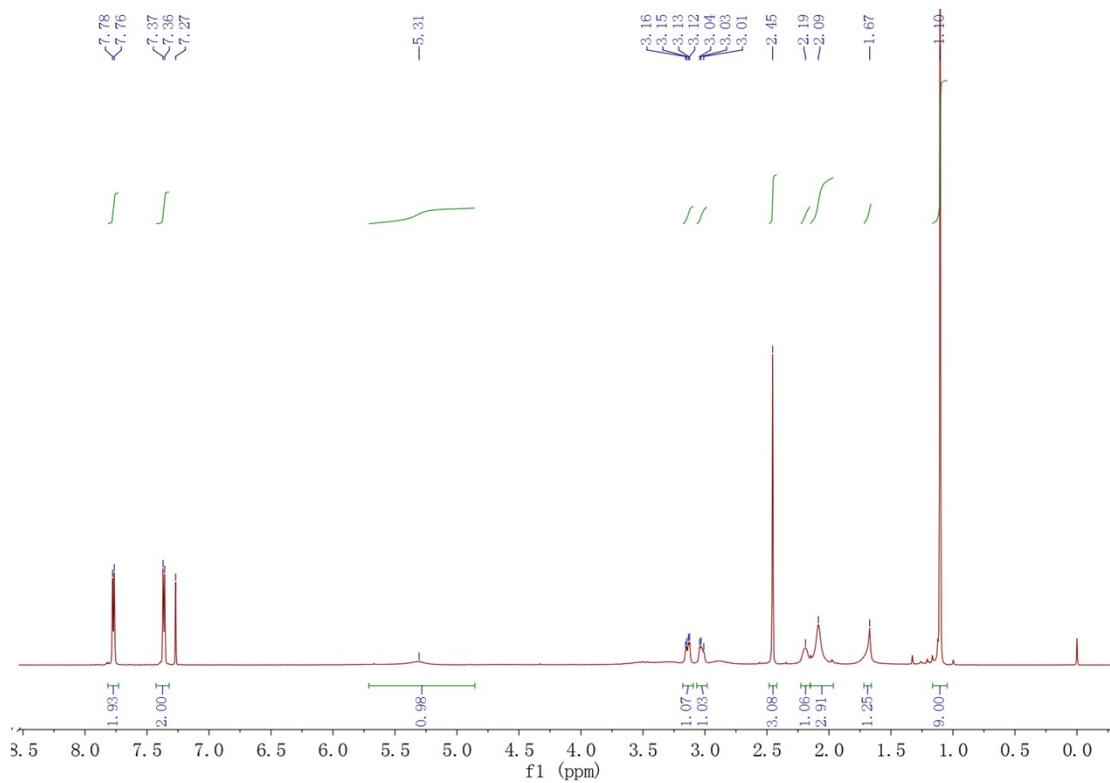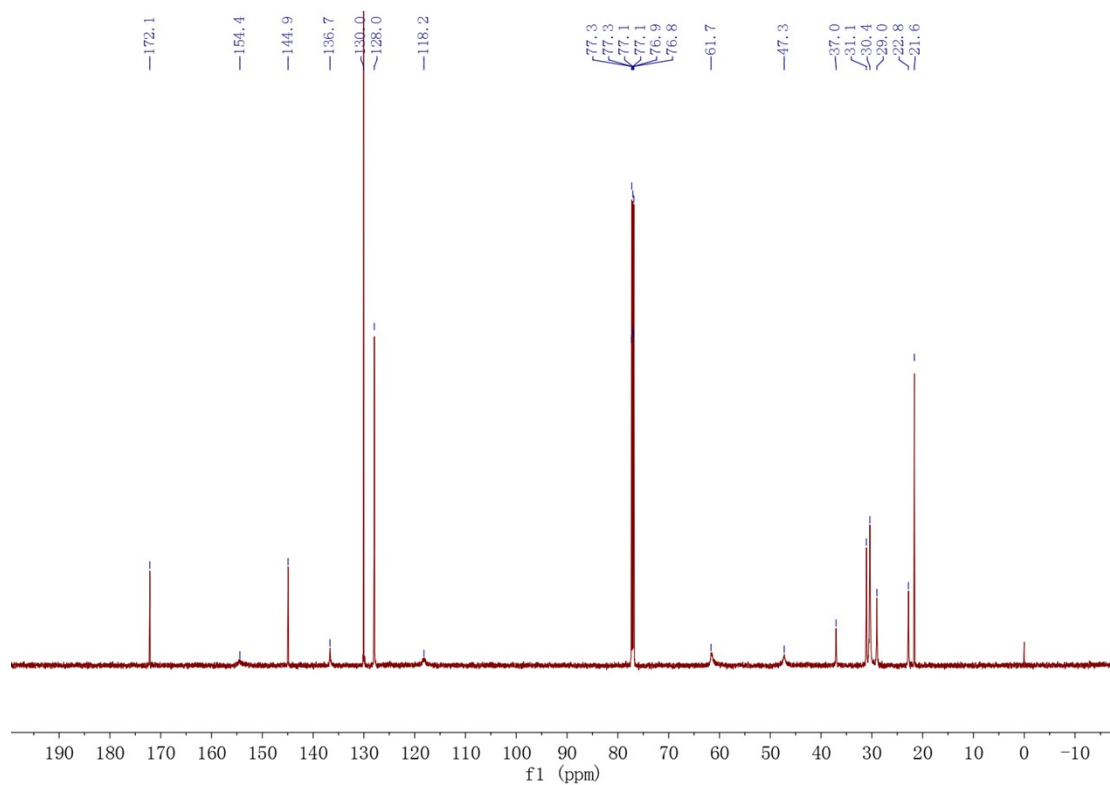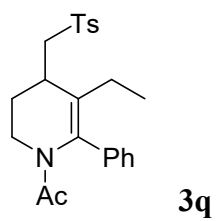

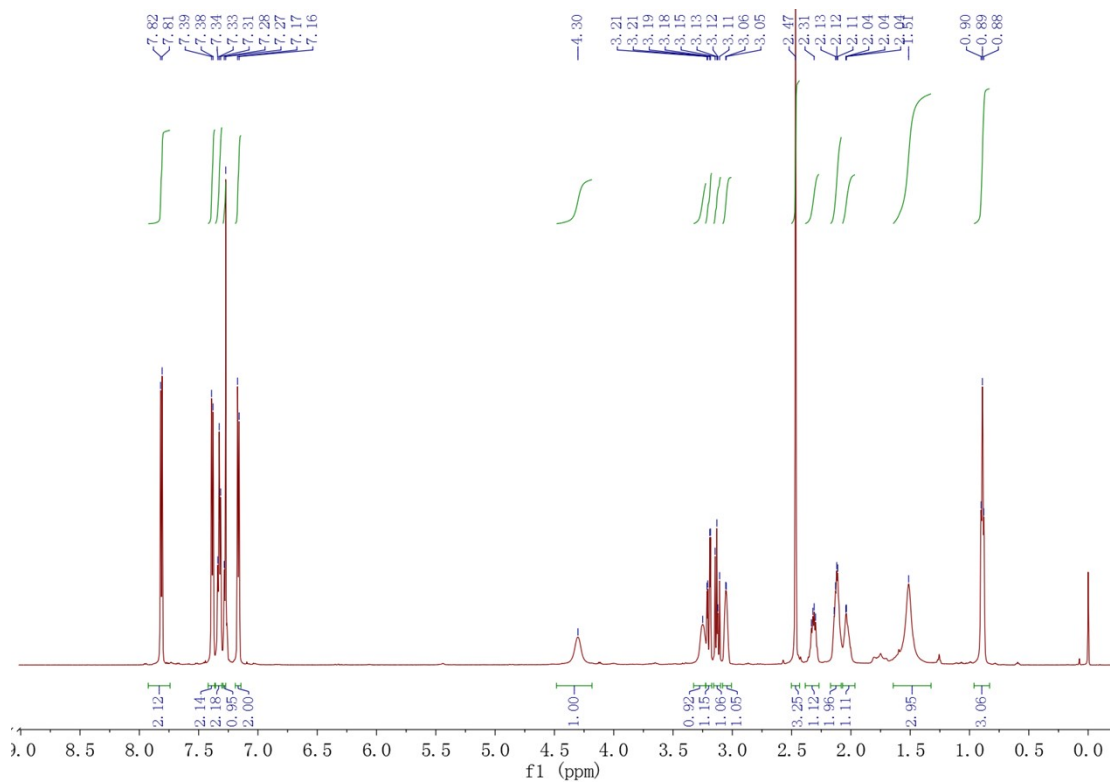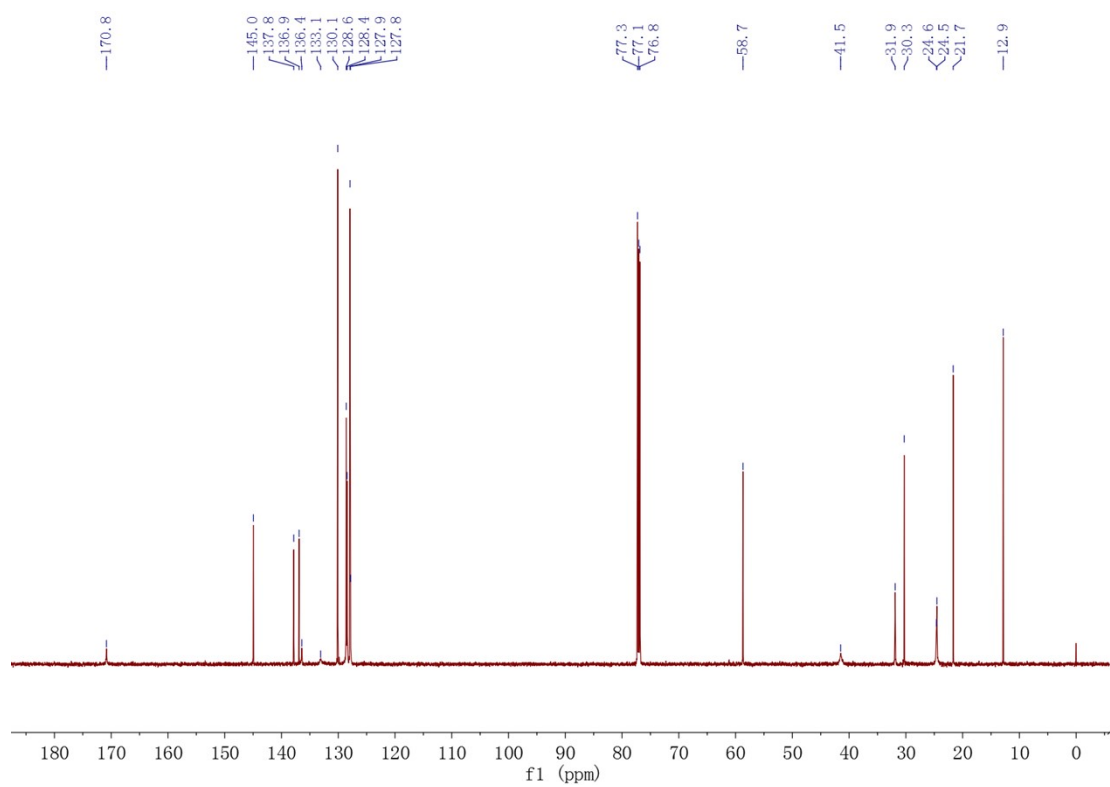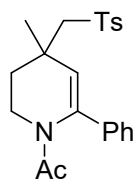

**3r**

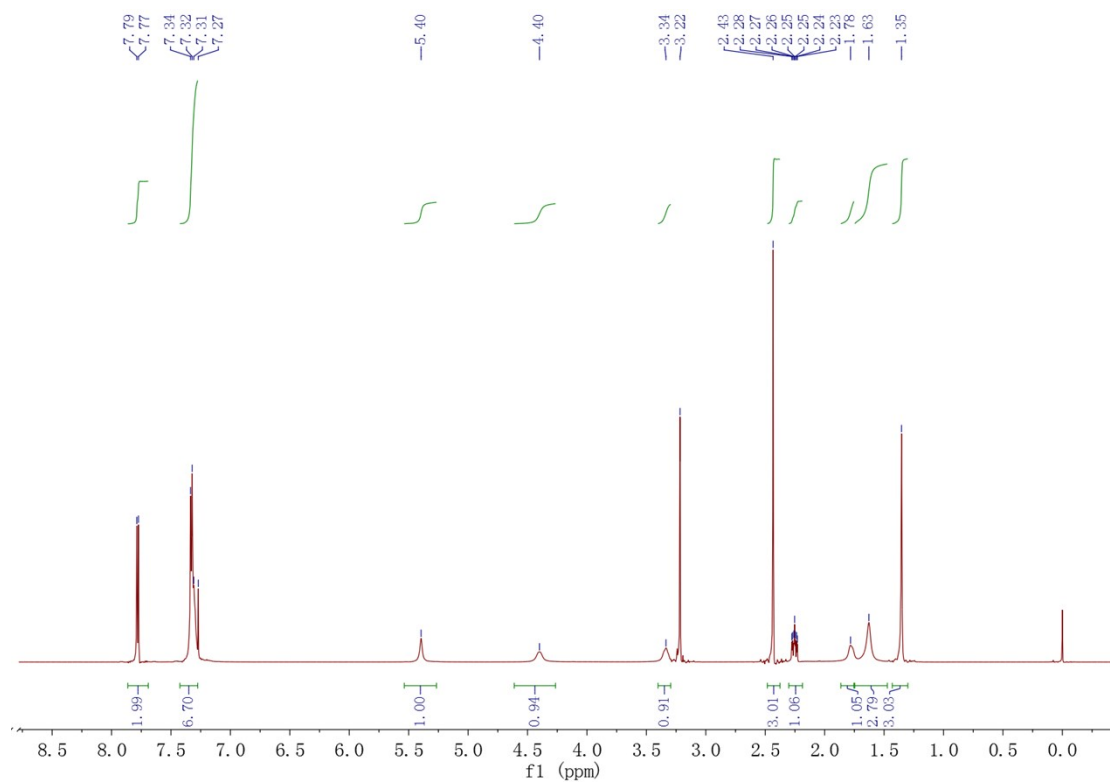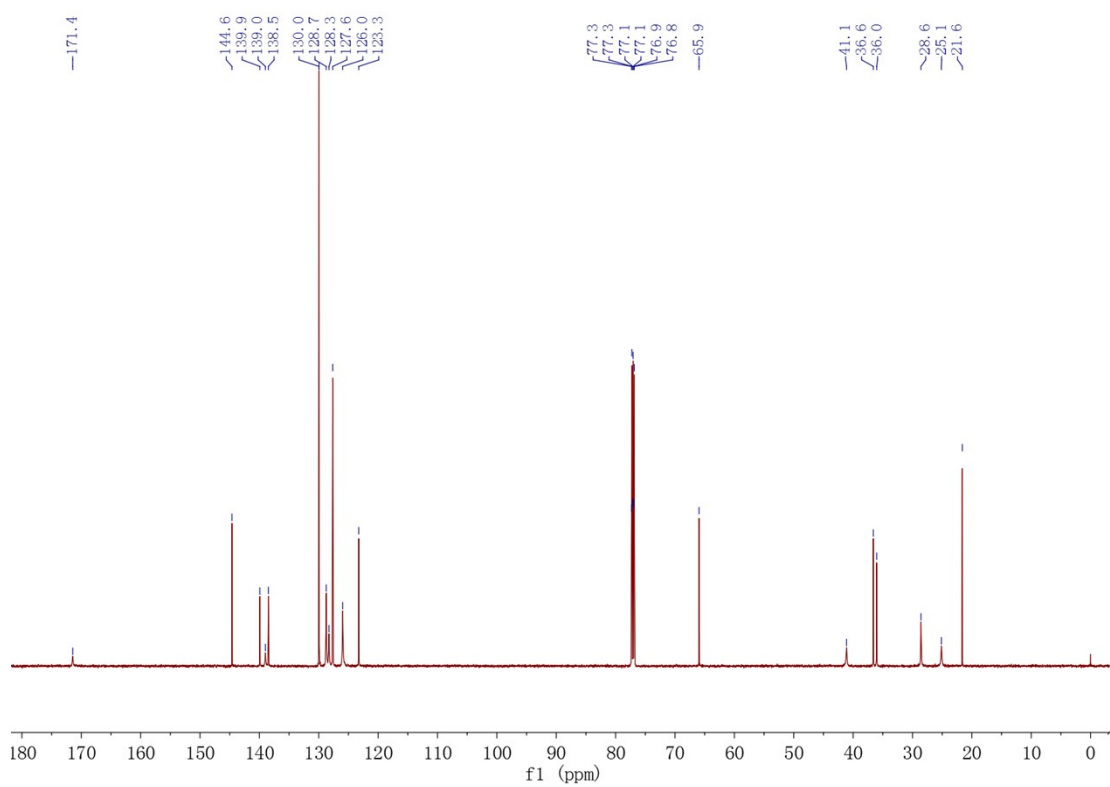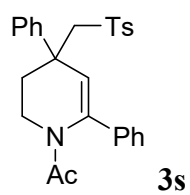

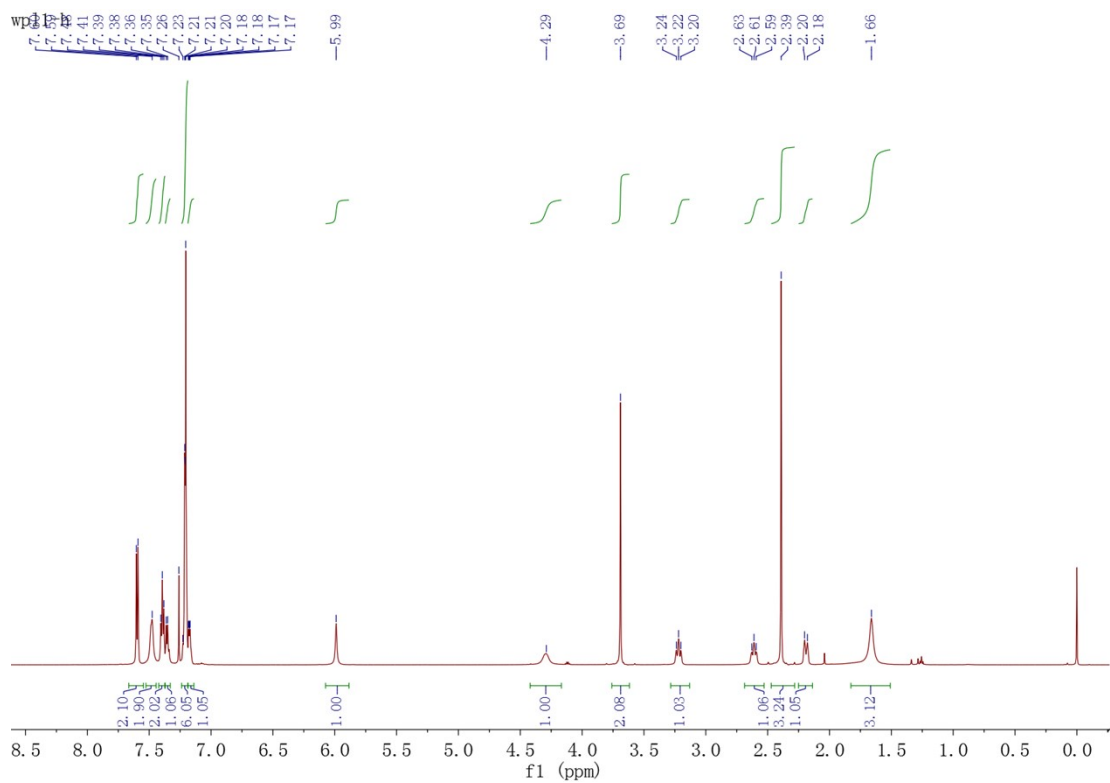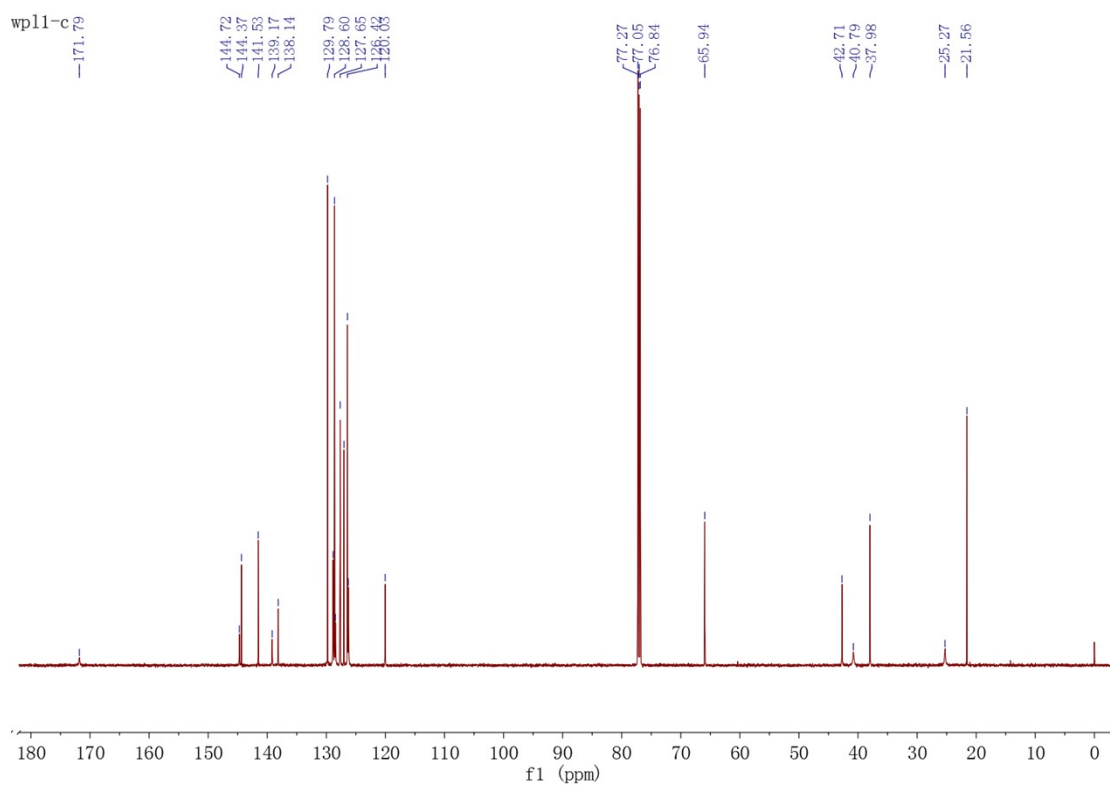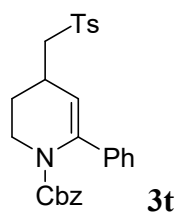

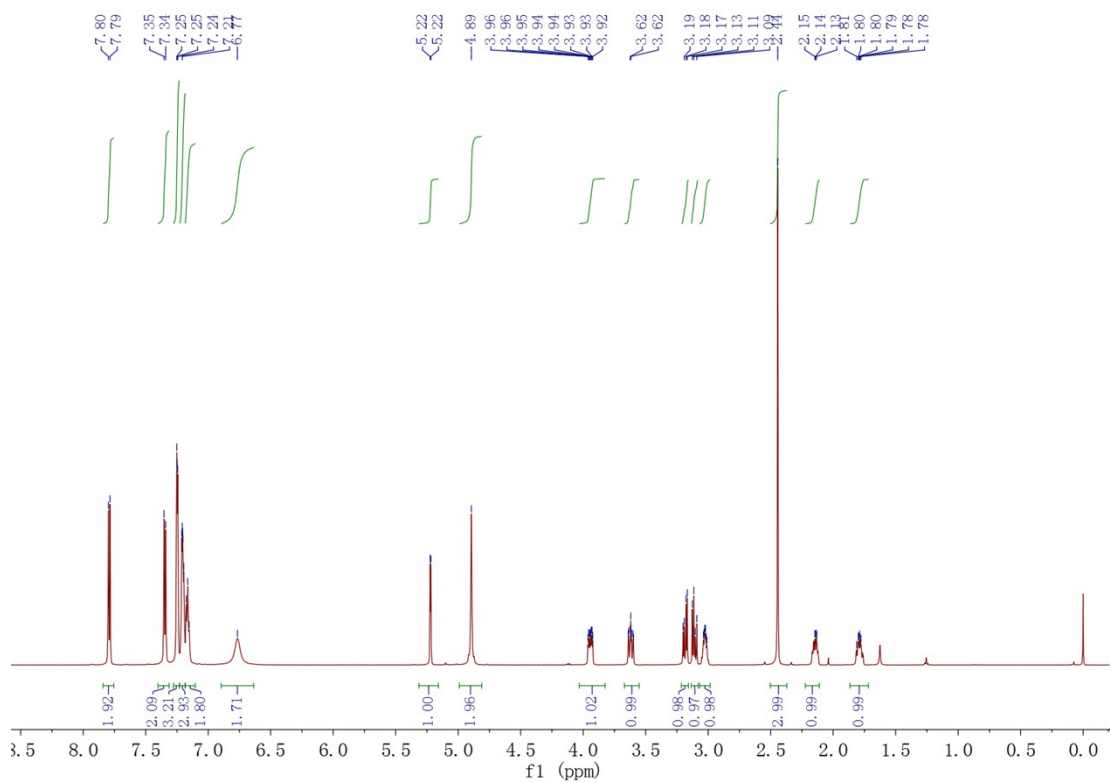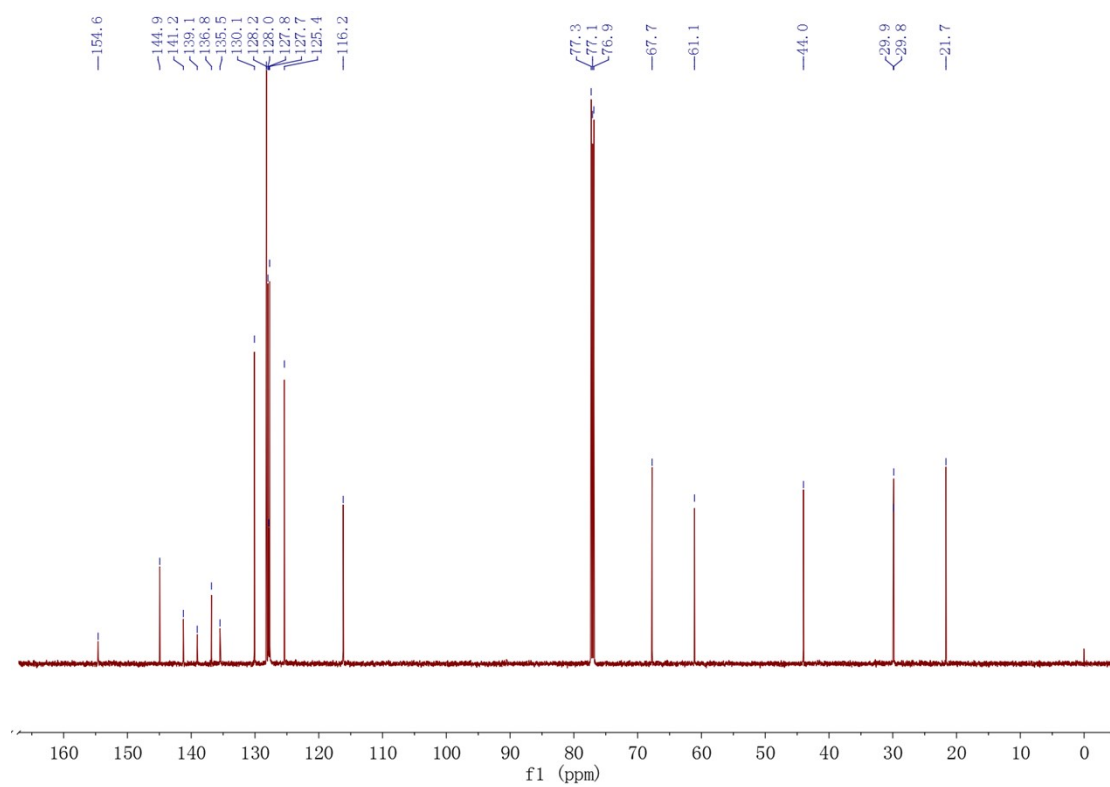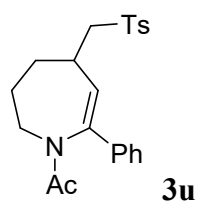

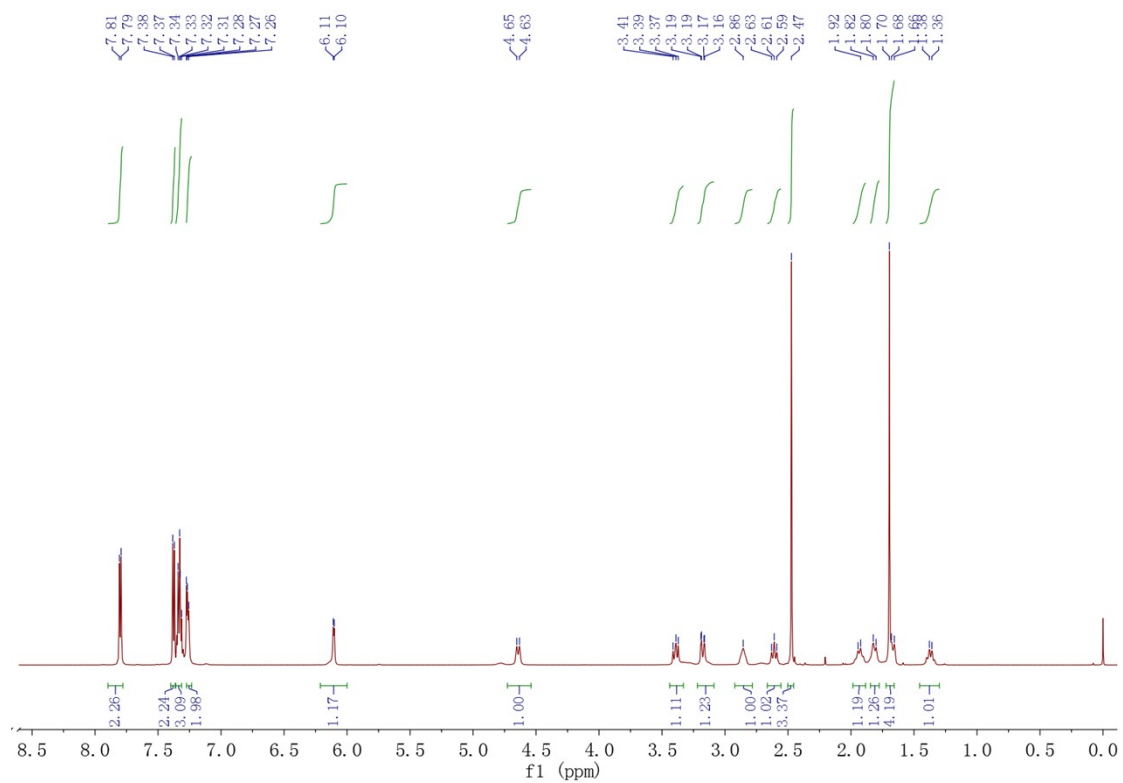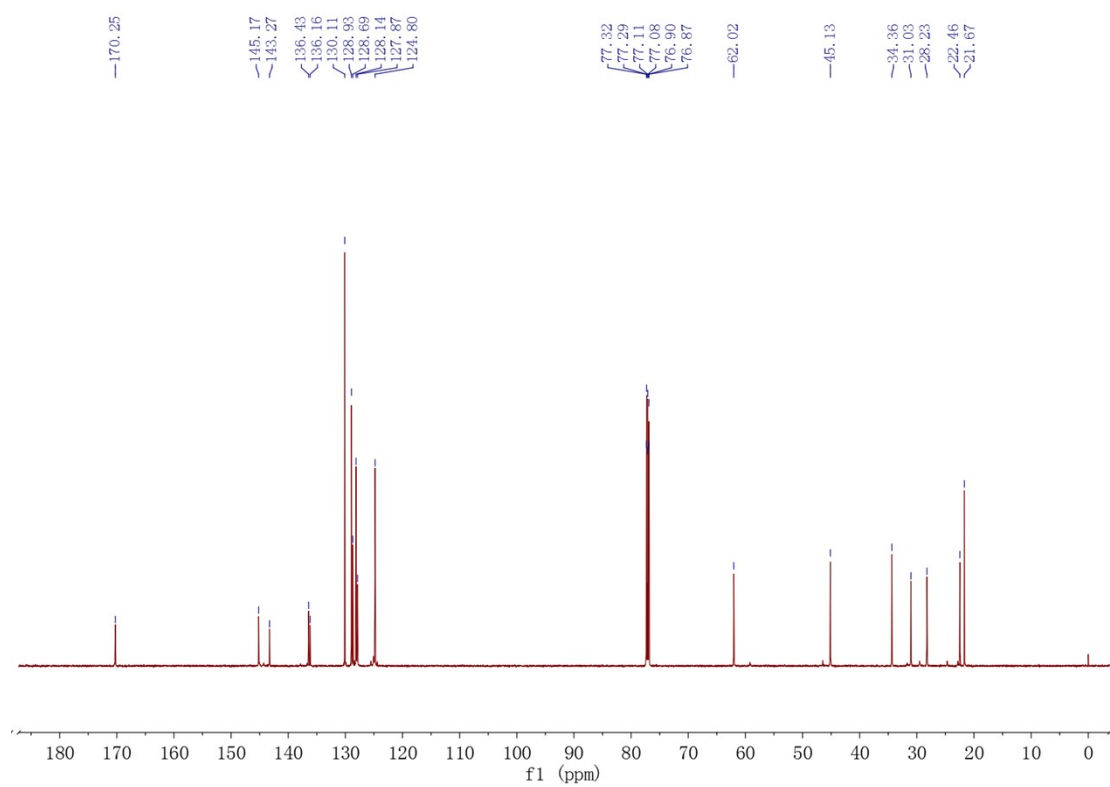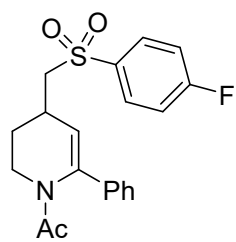

**4a**

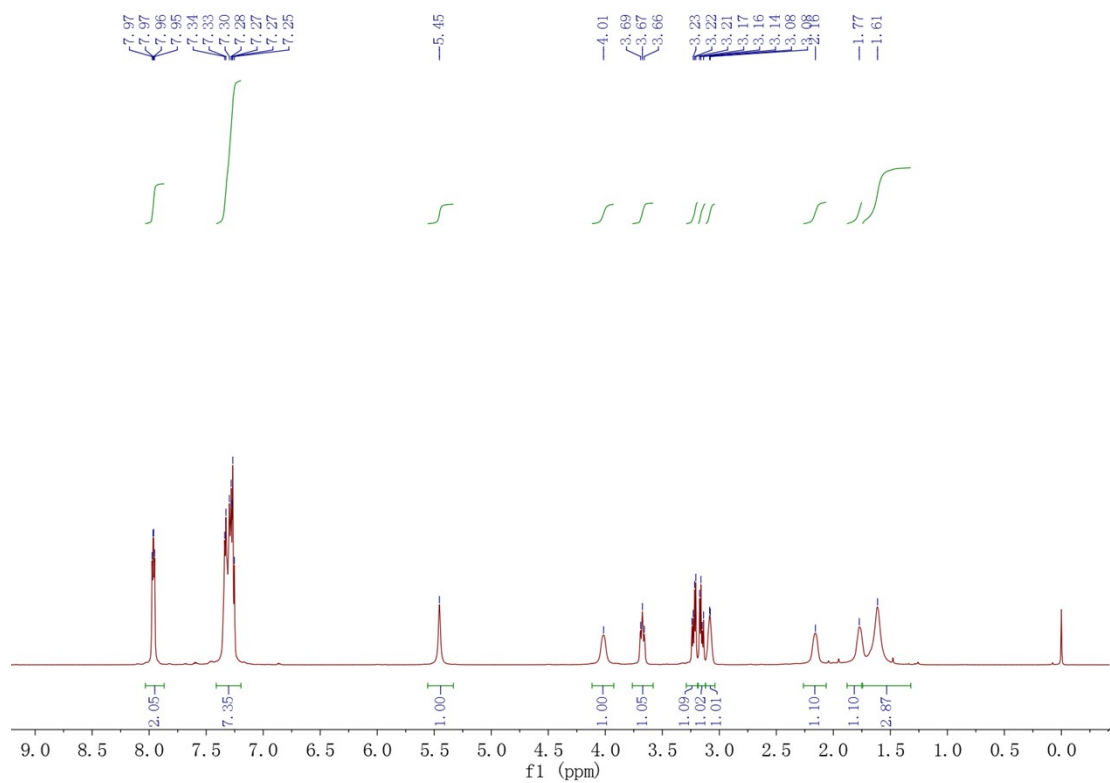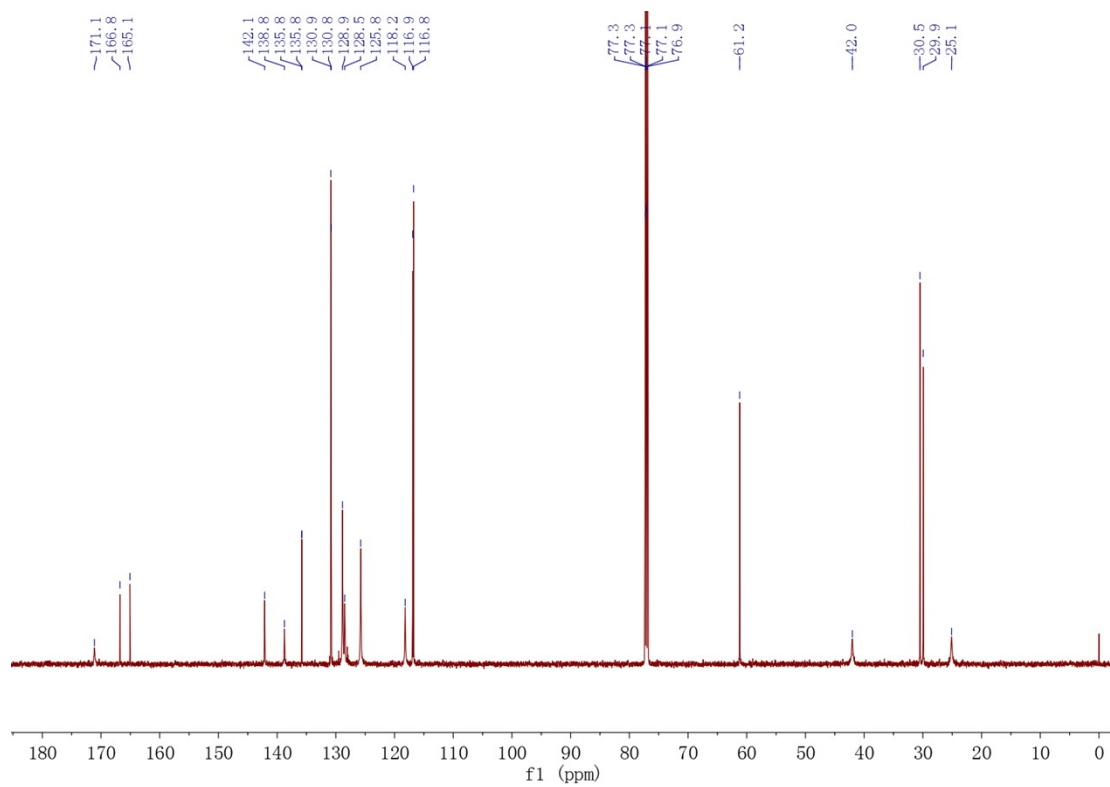

**4a**



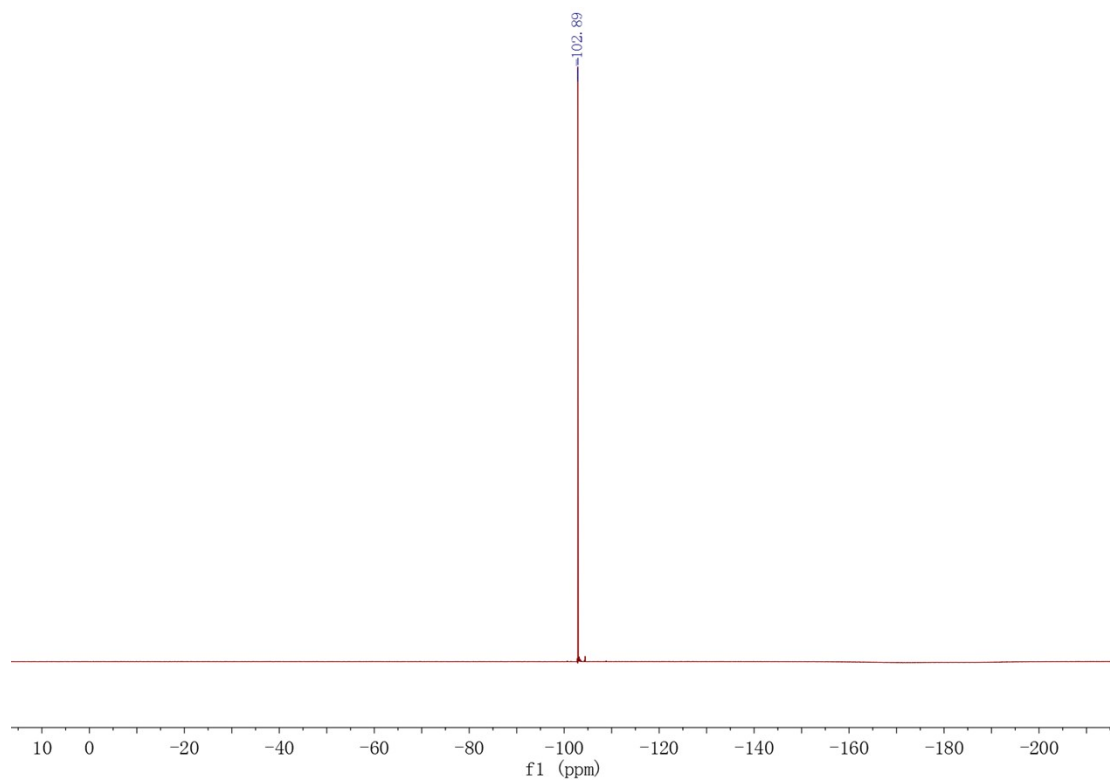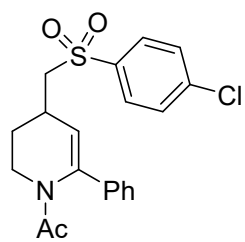

**4b**

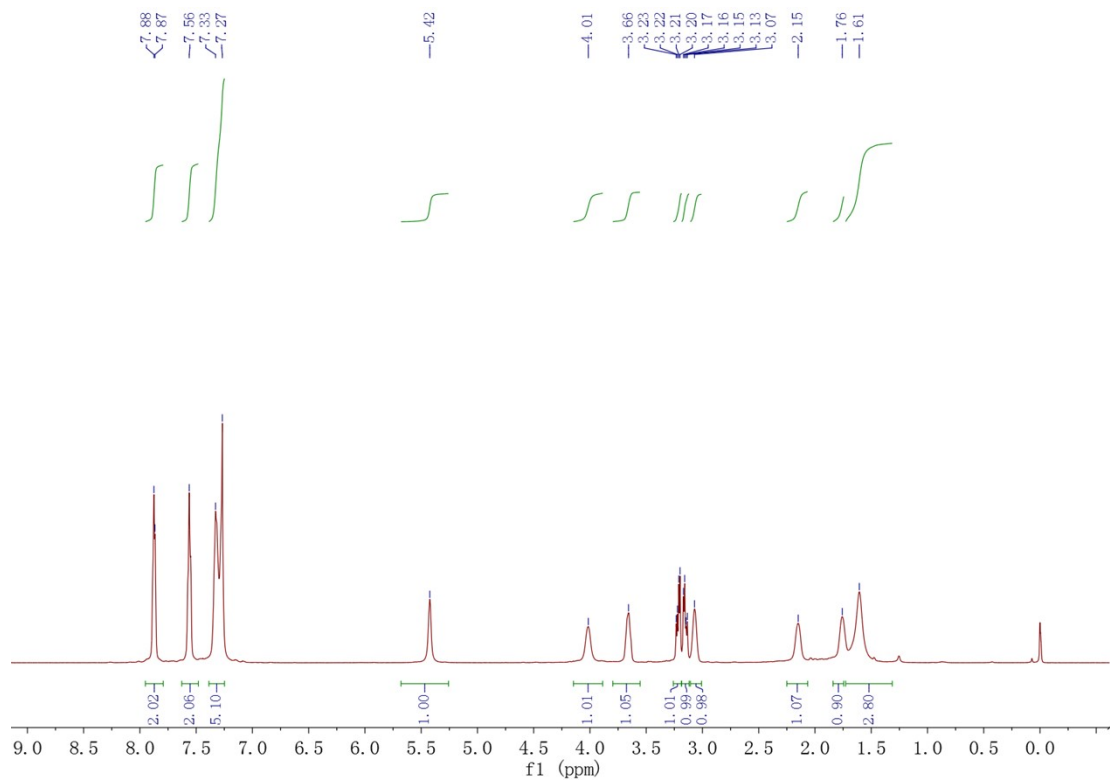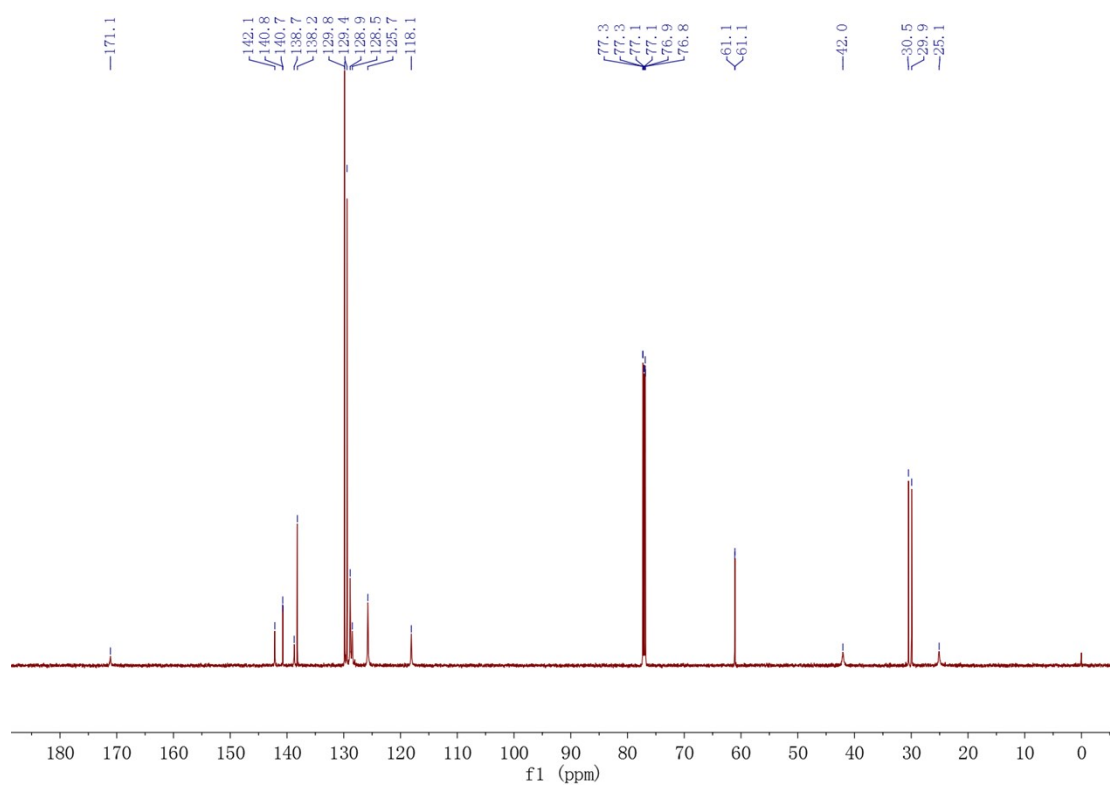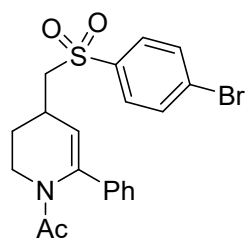

4c

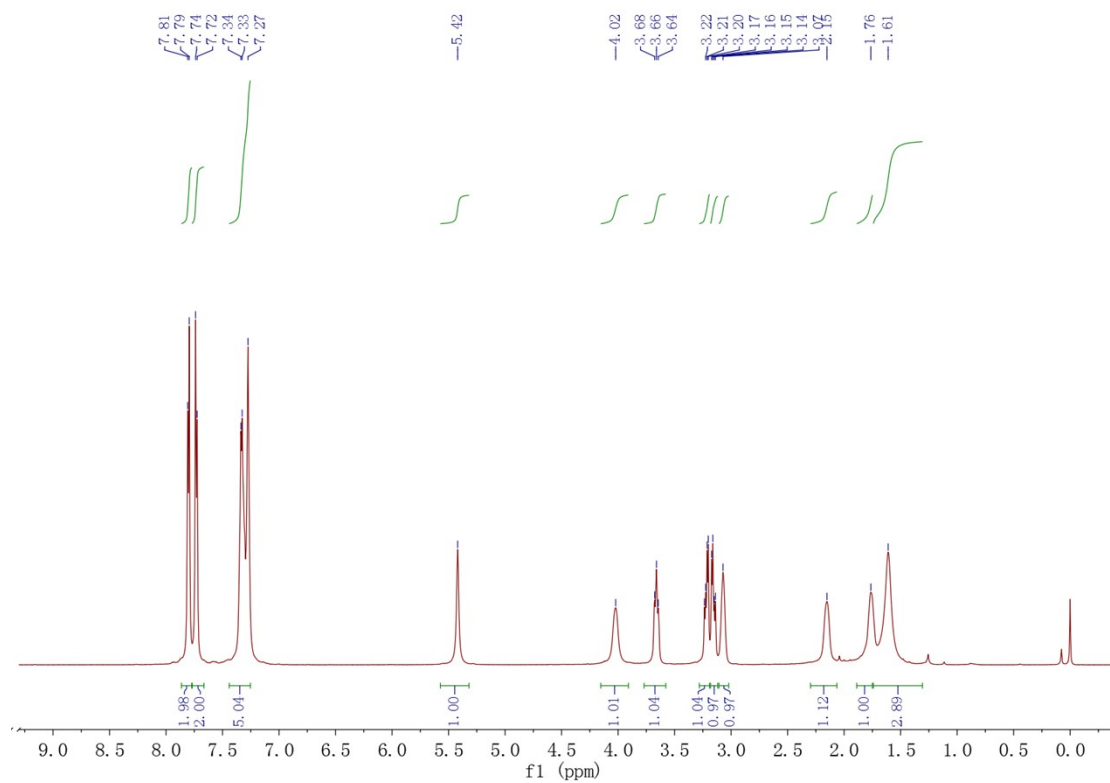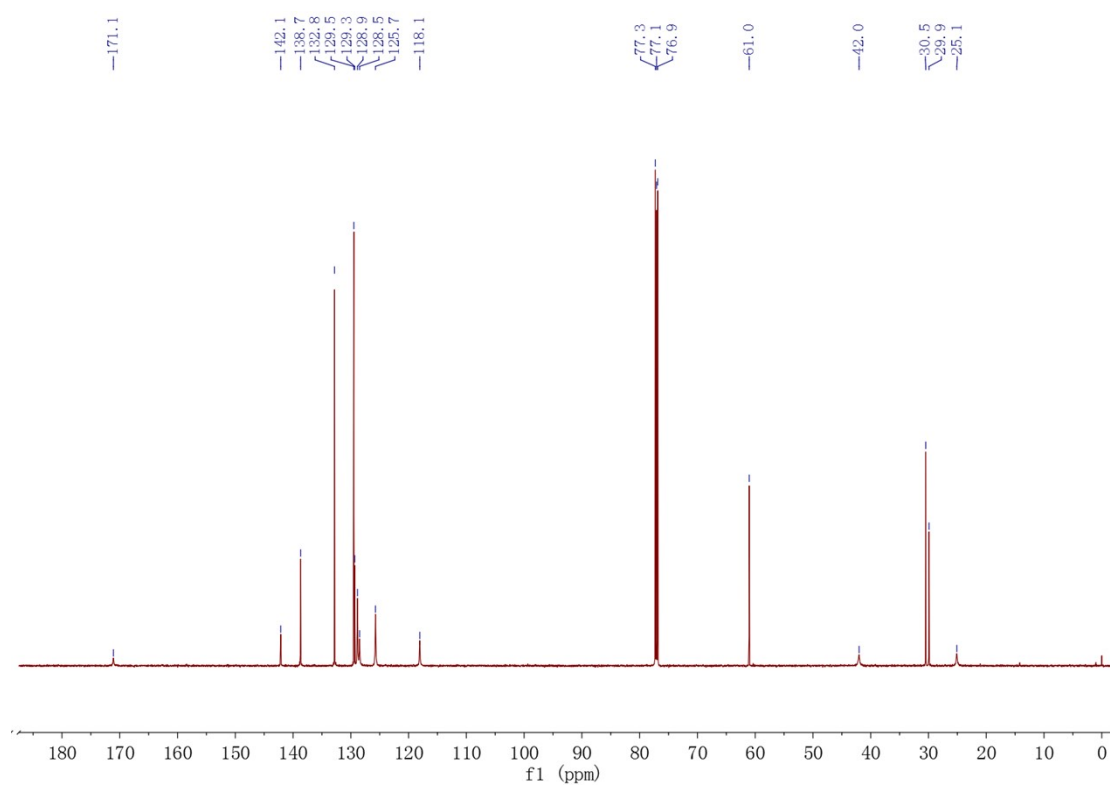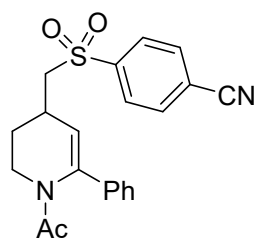

**4d**

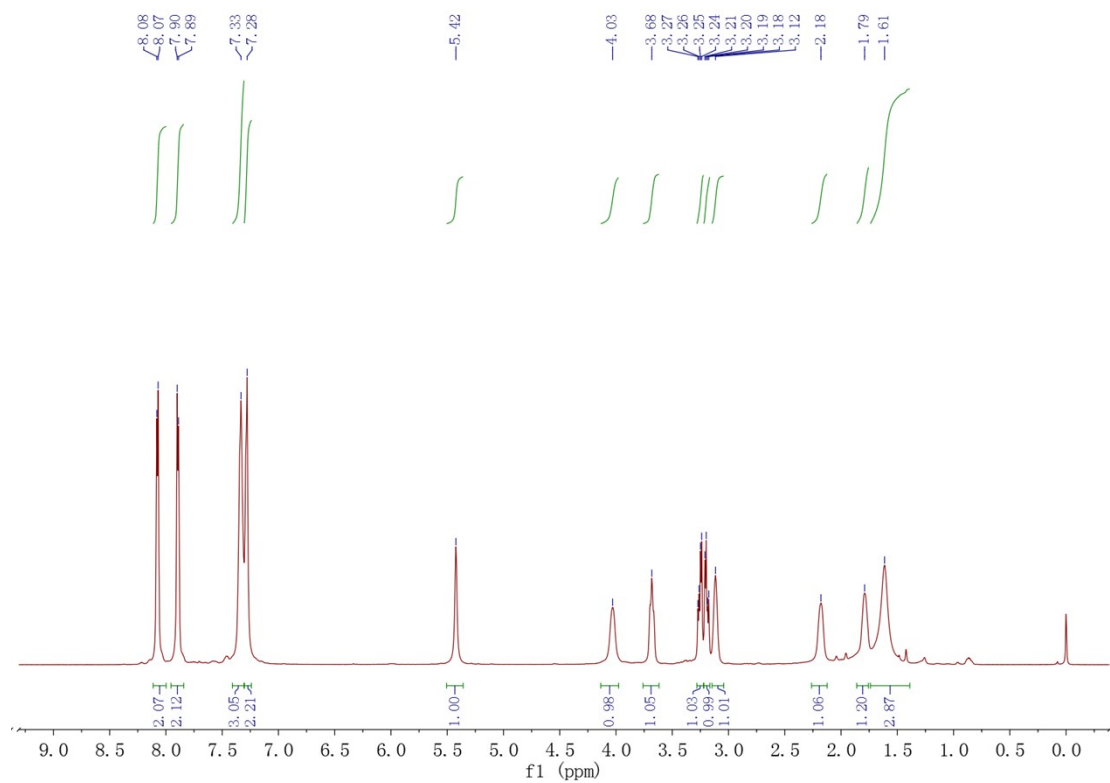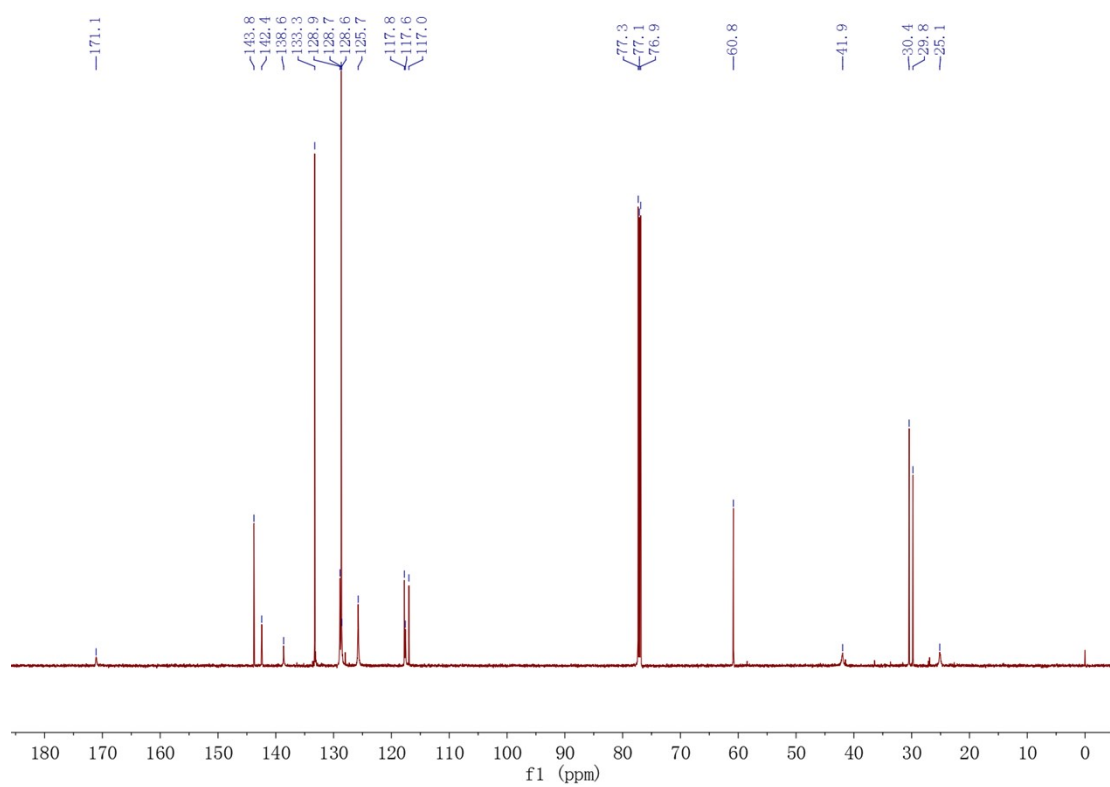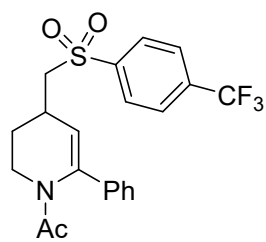

**4e**

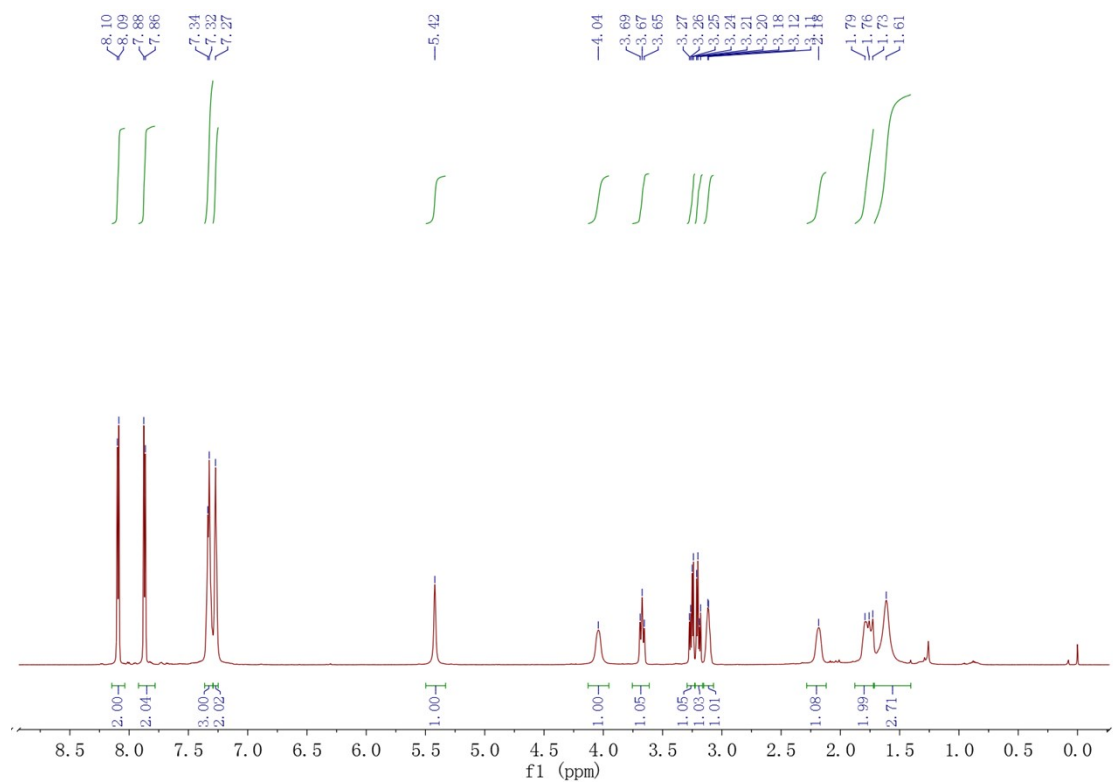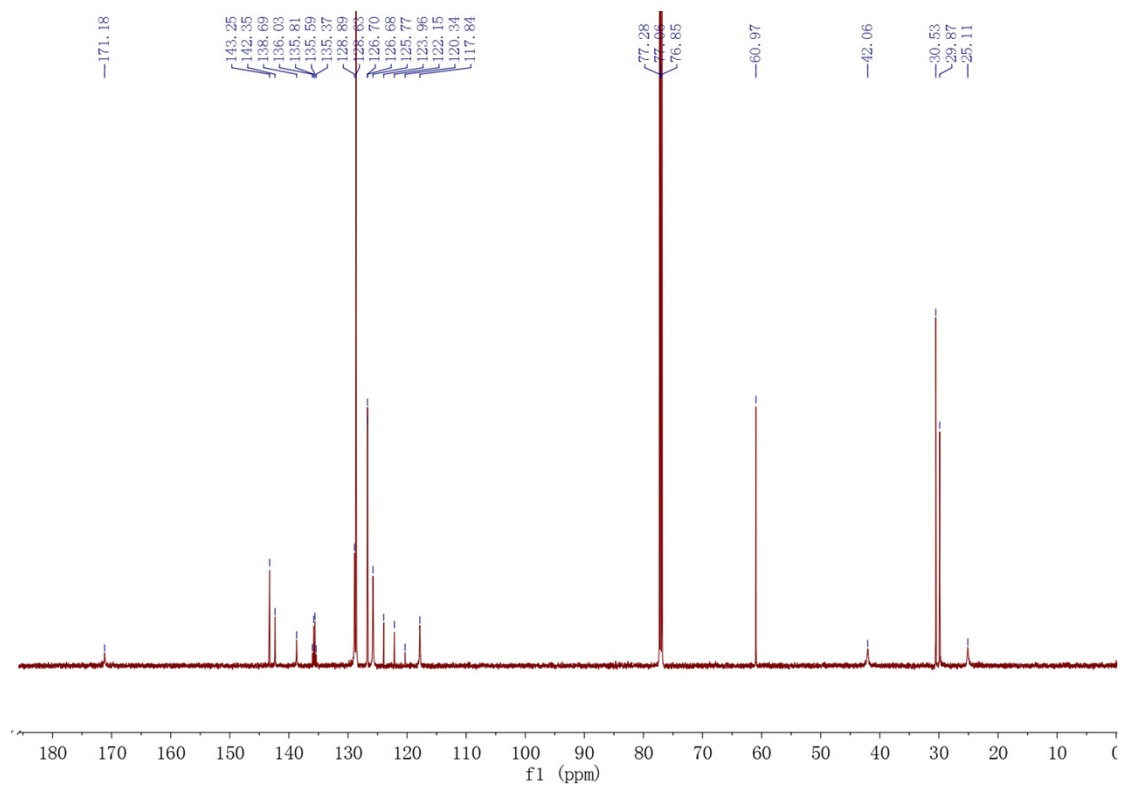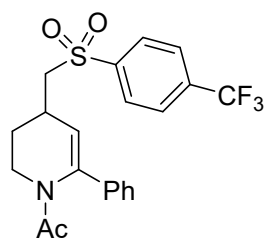

**4e**

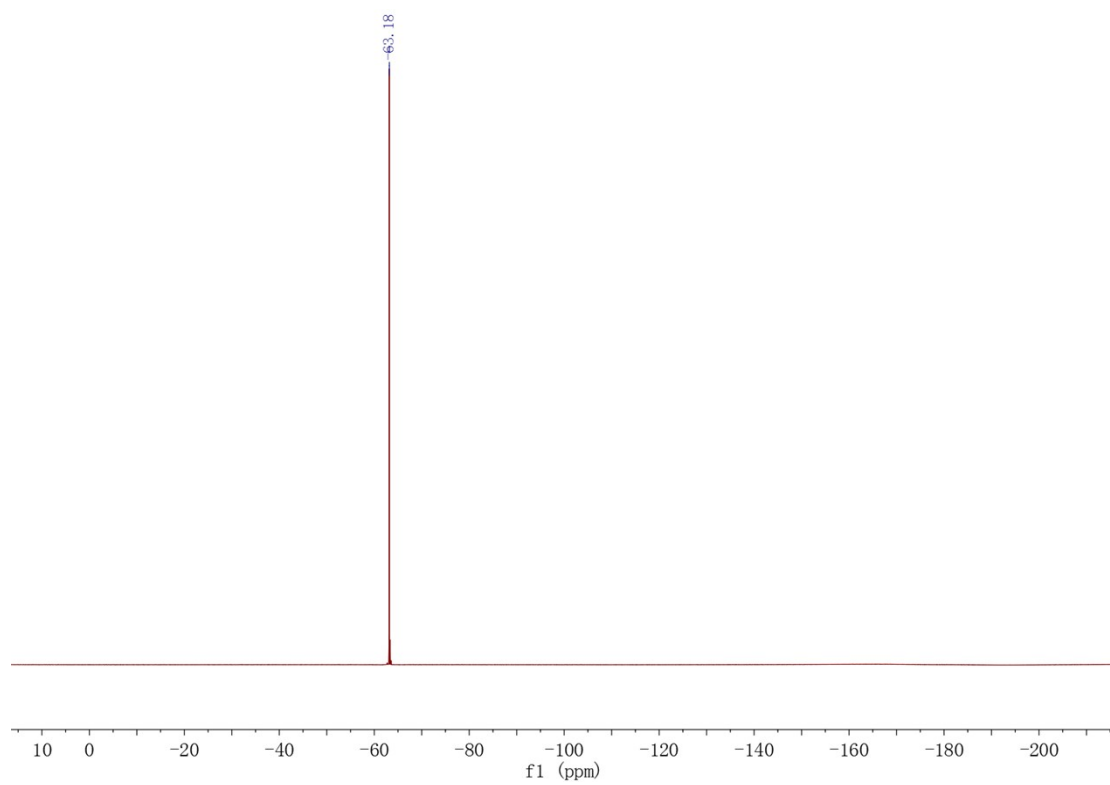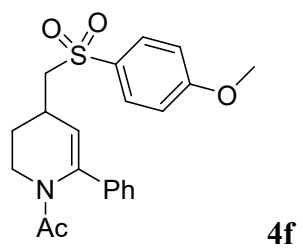

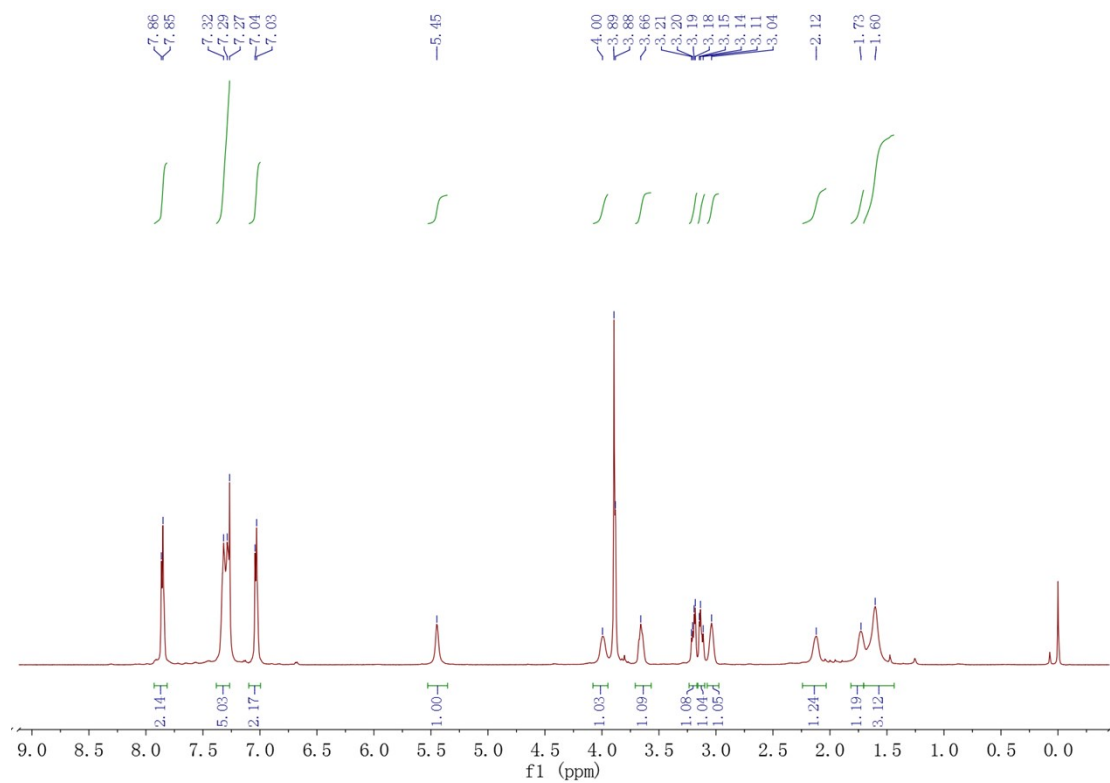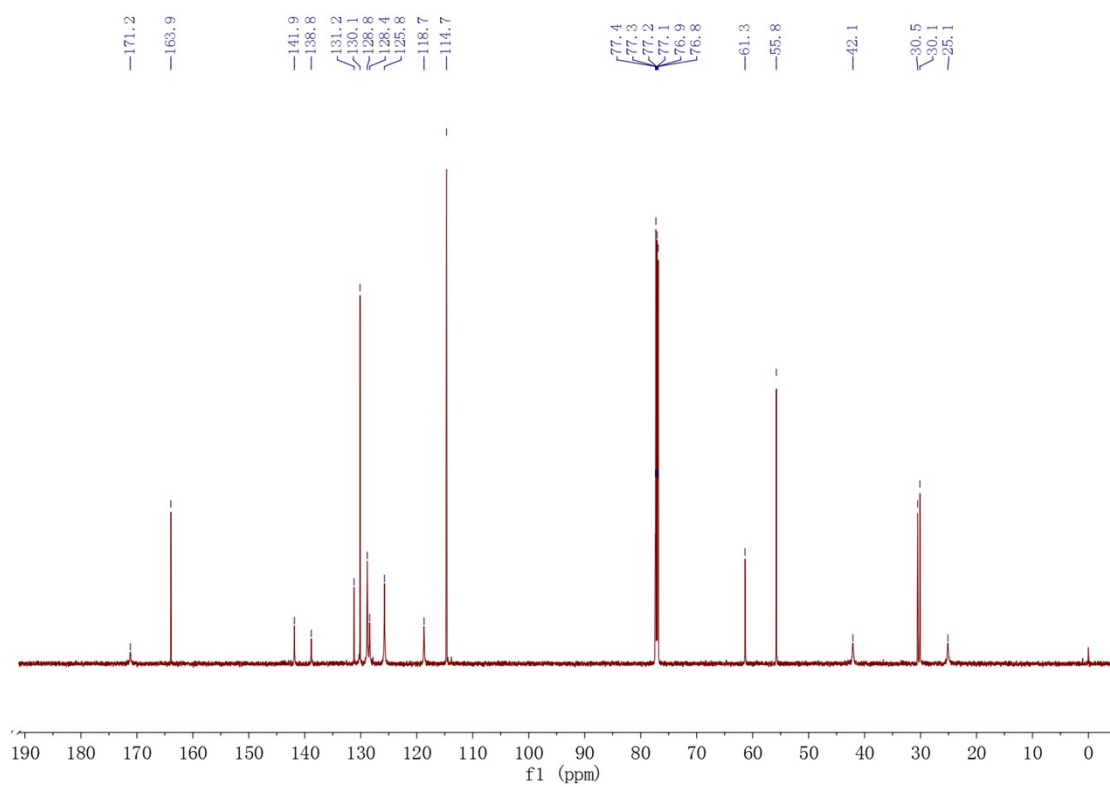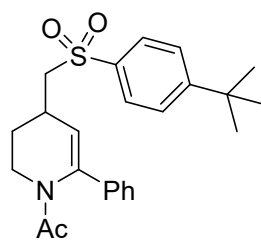

**4g**

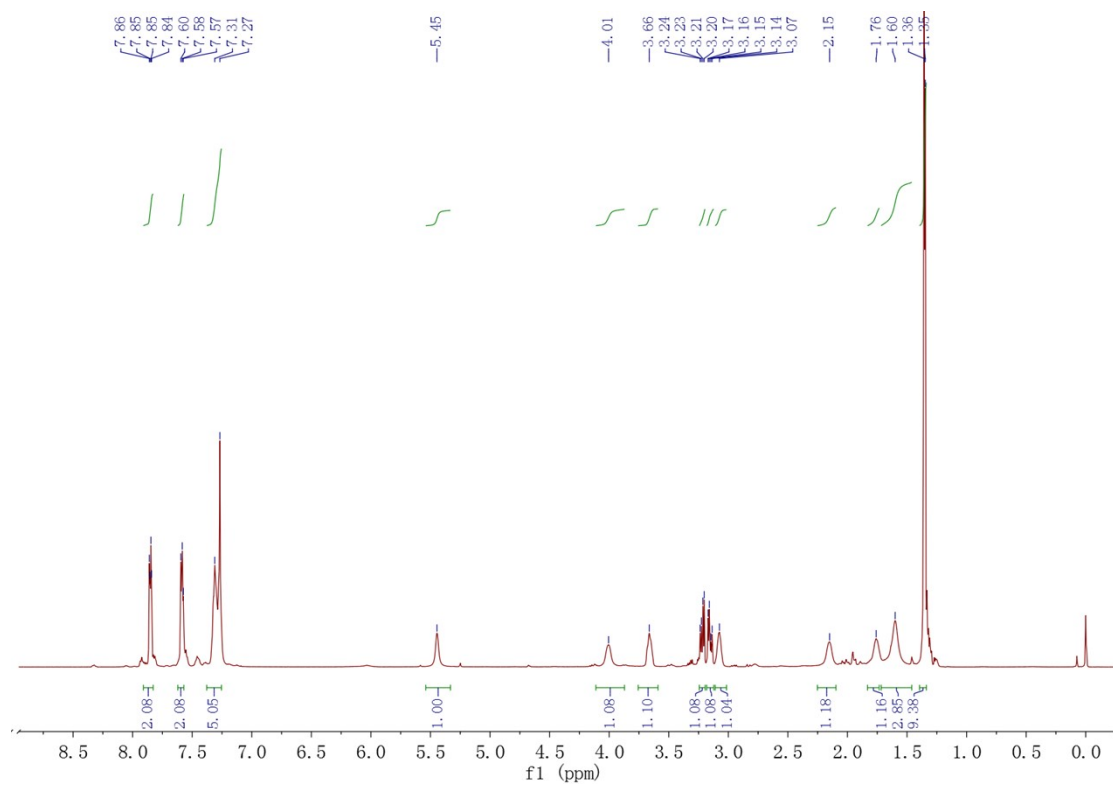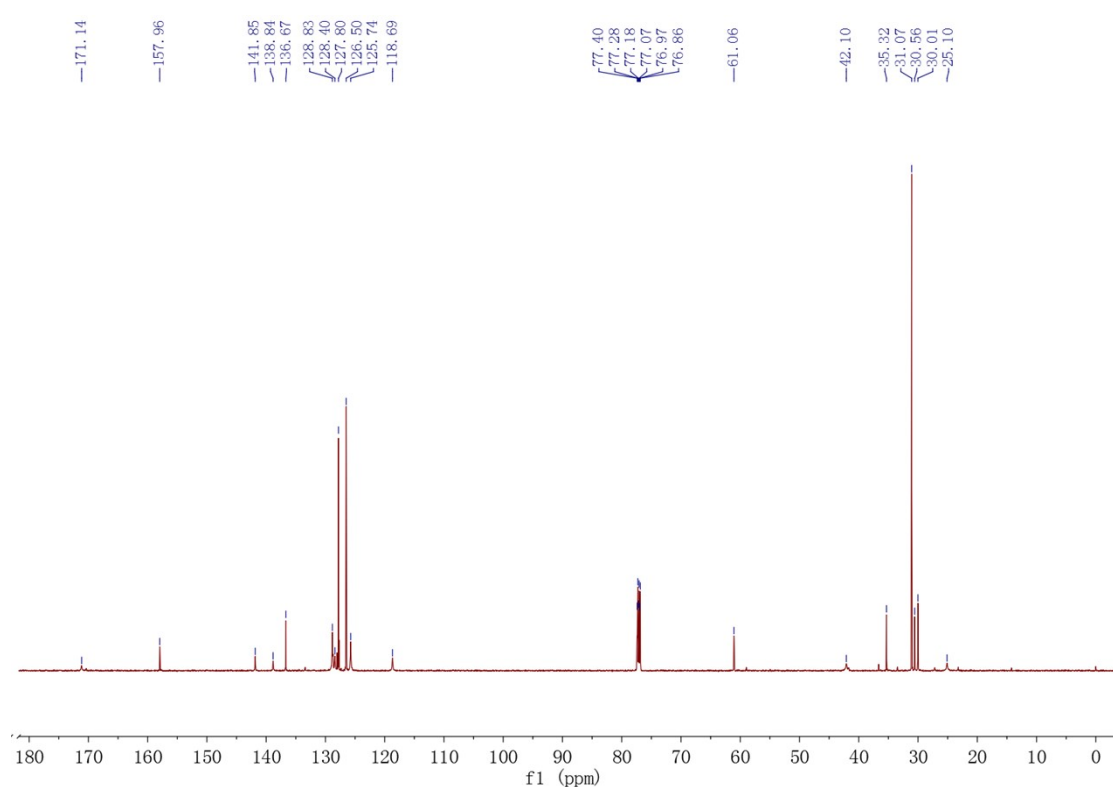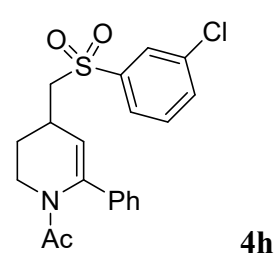



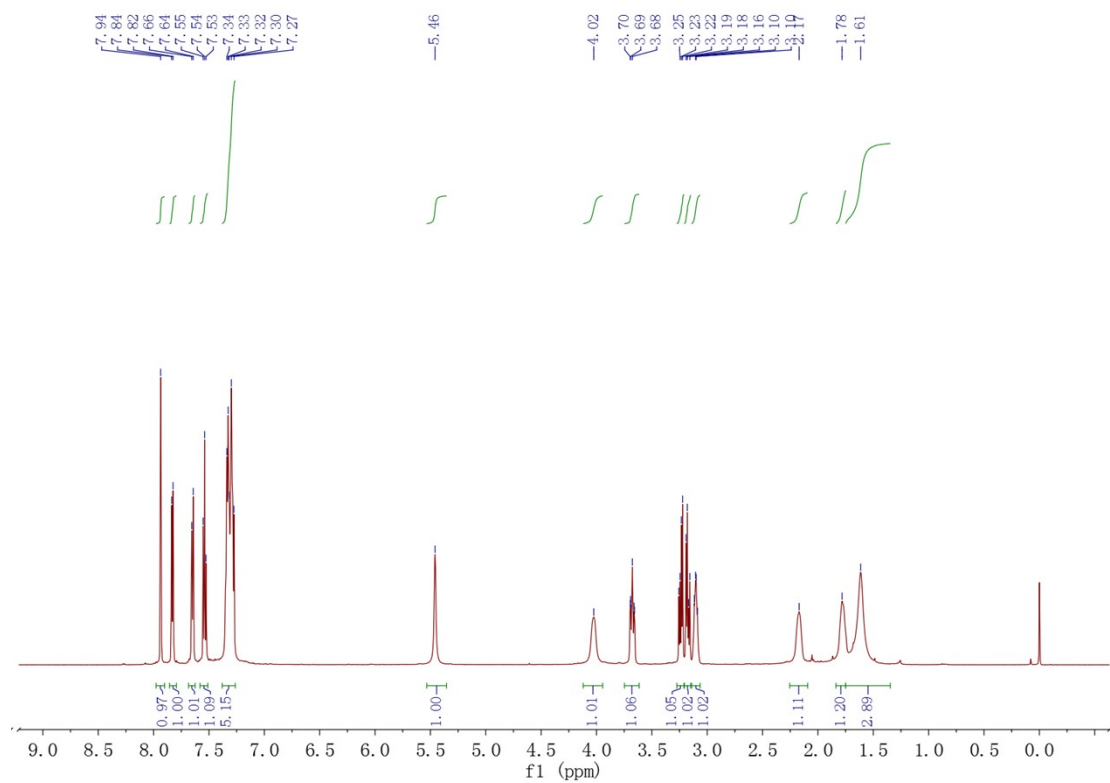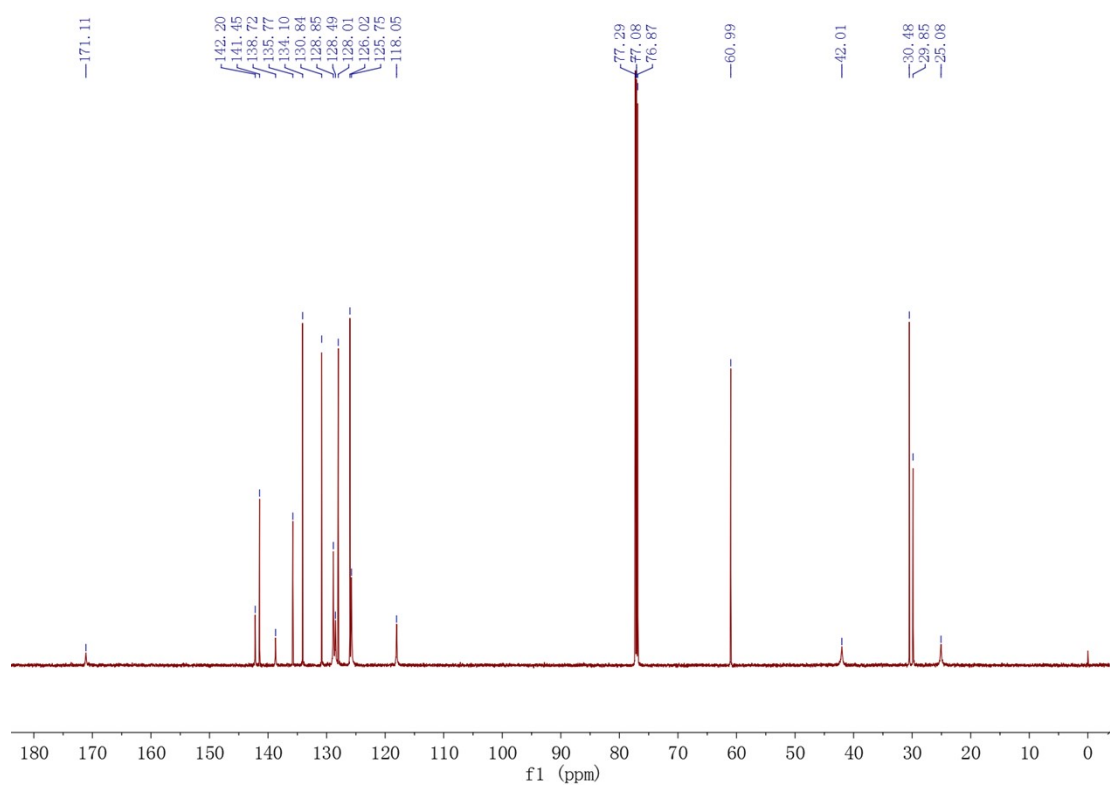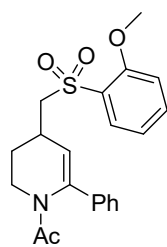

**4i**

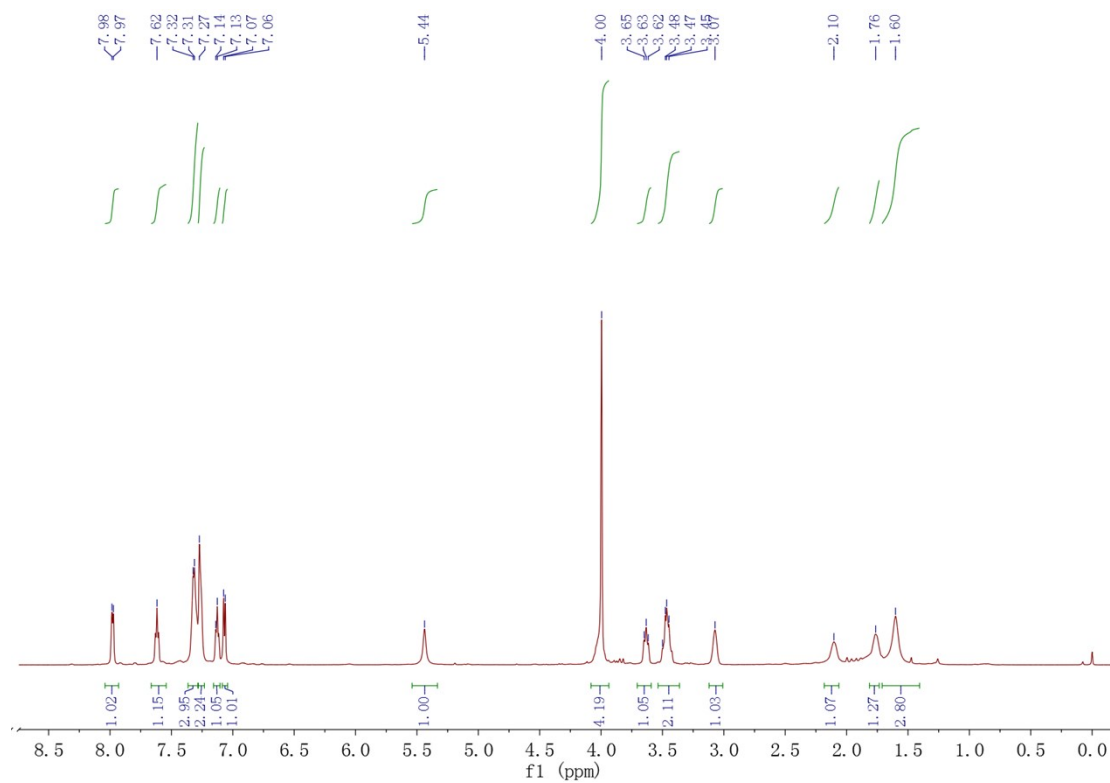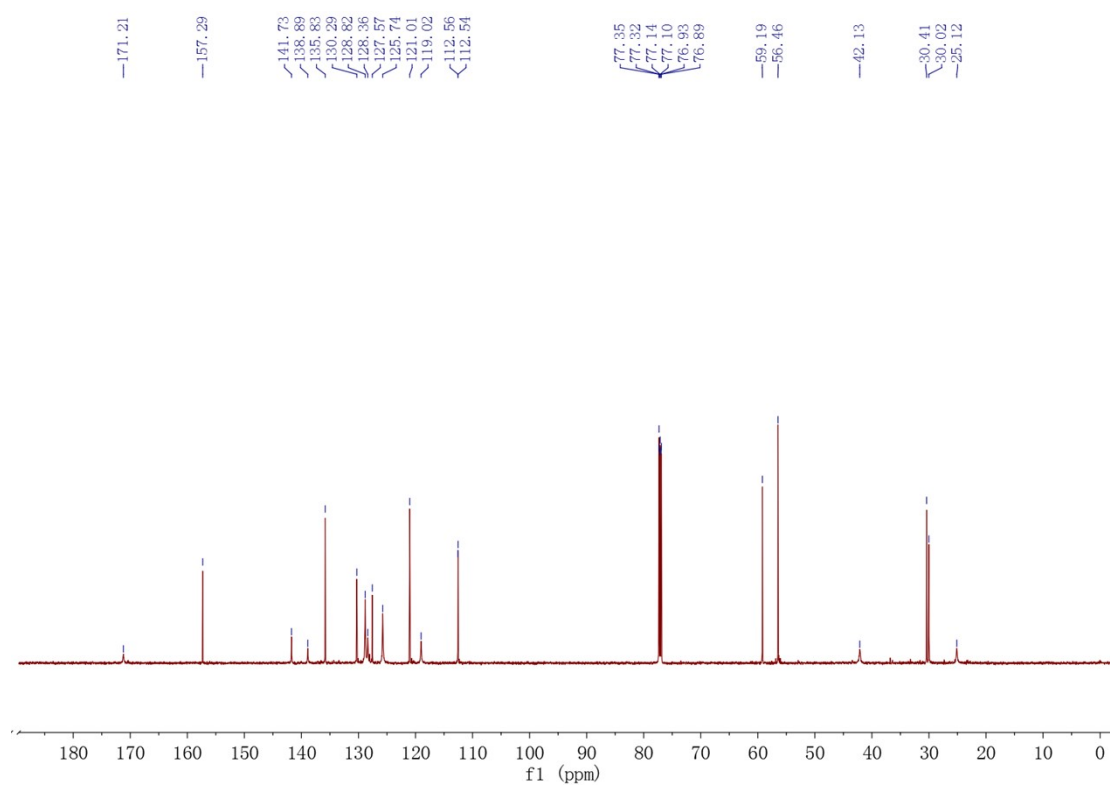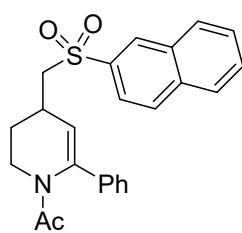

**4j**

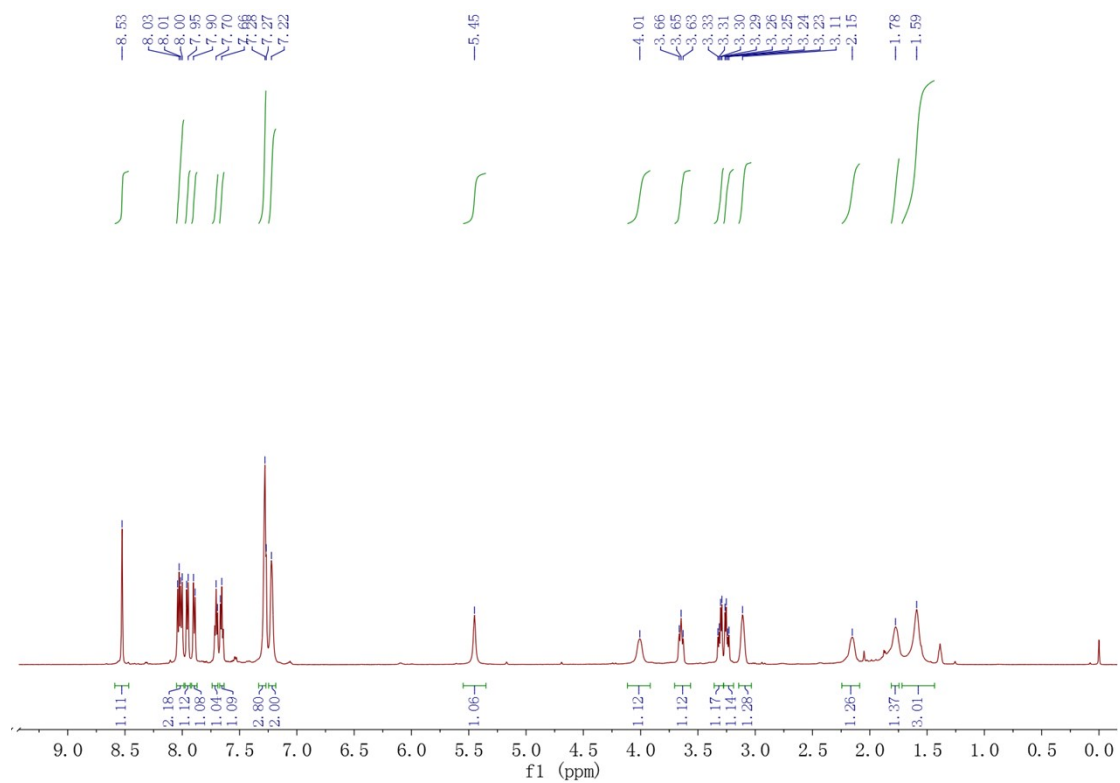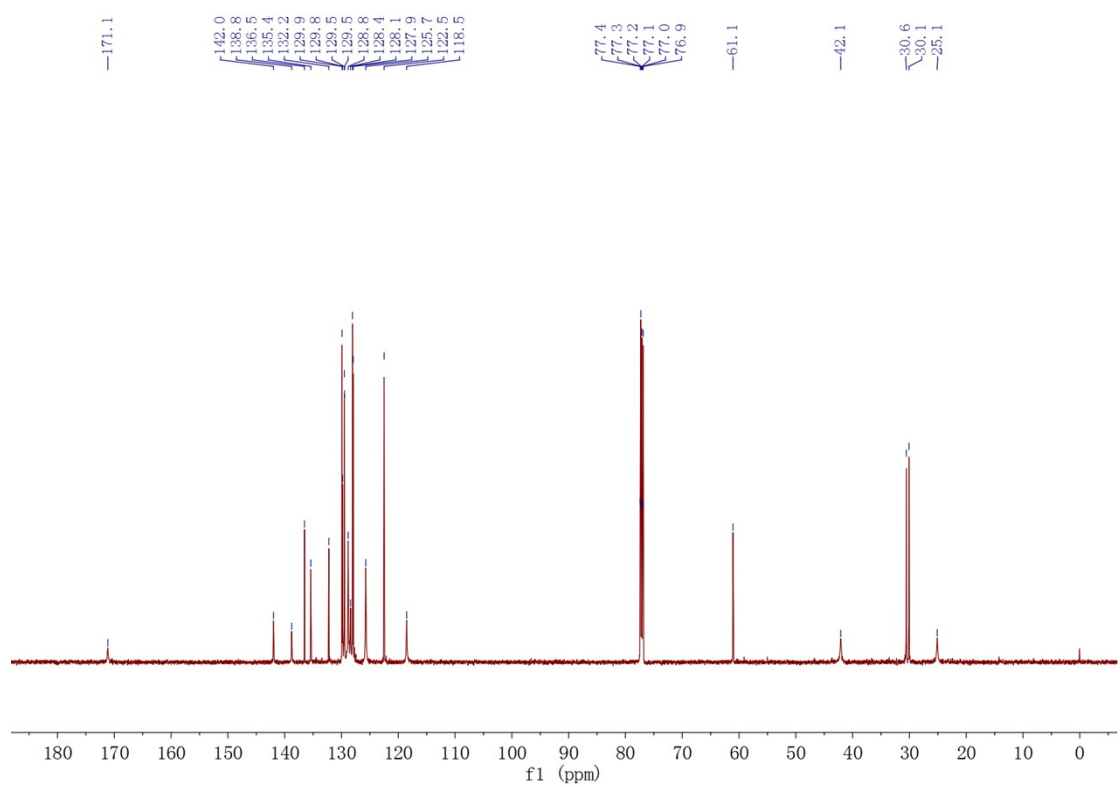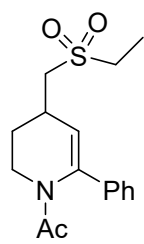

4k

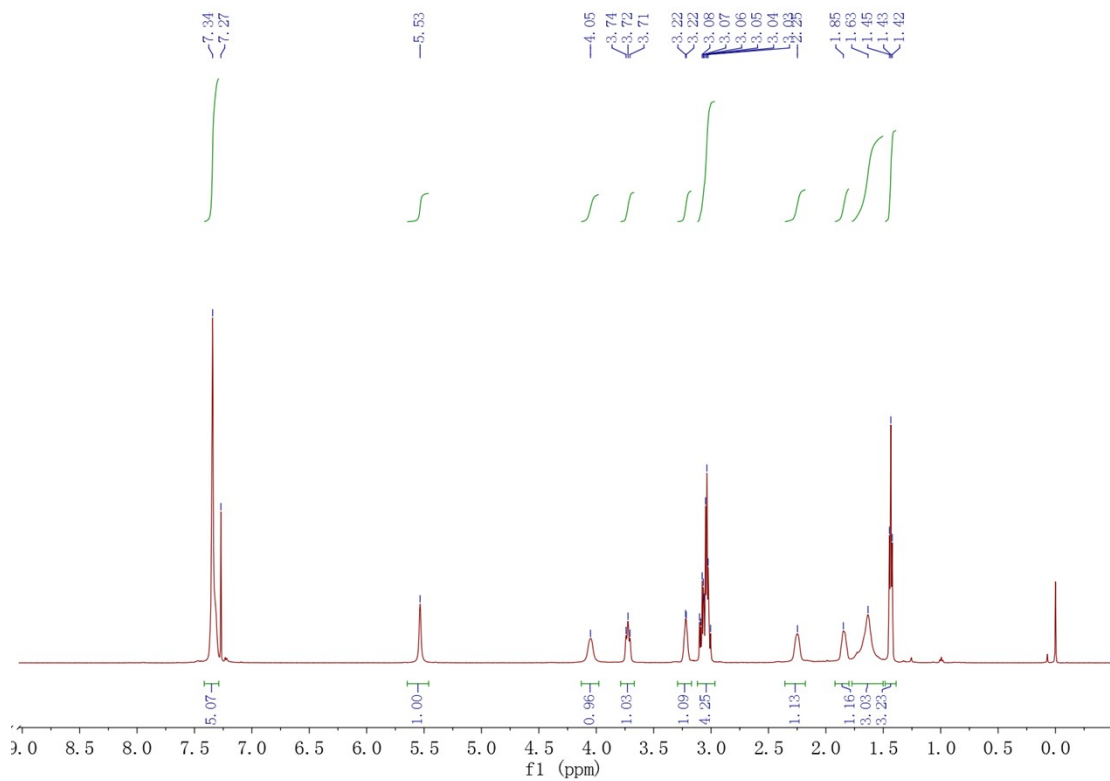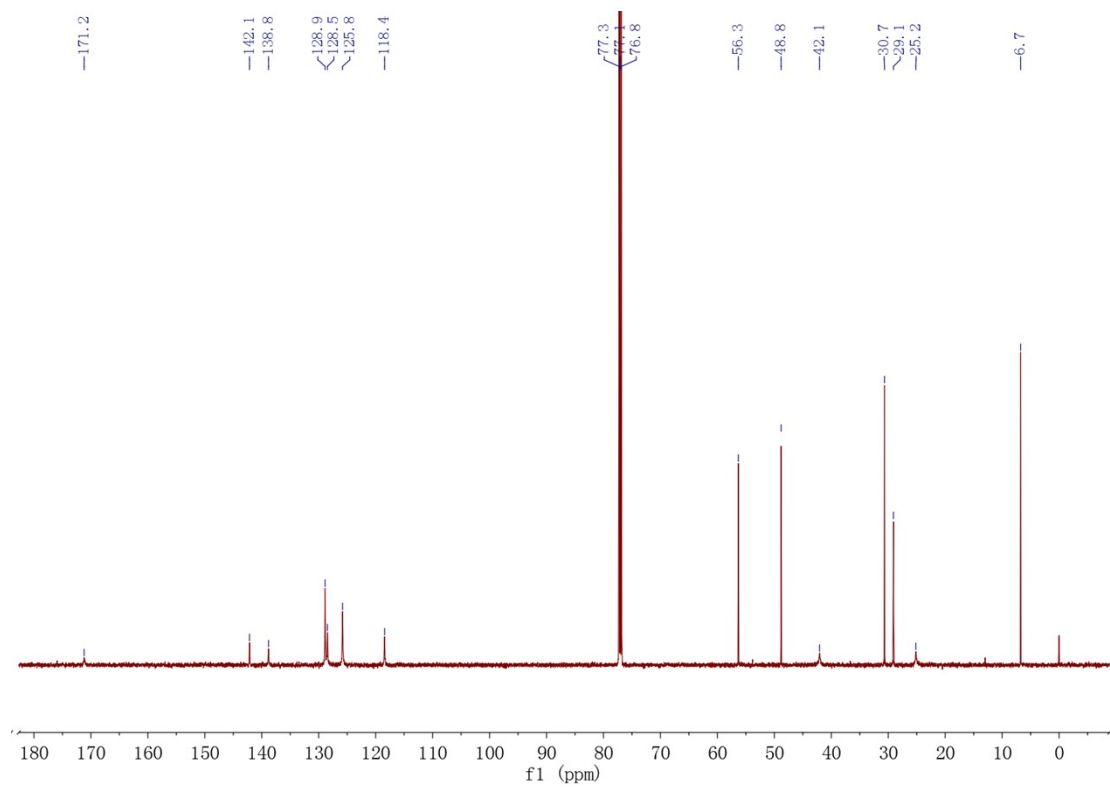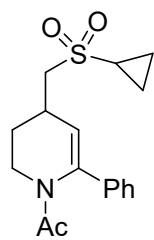

**4I**

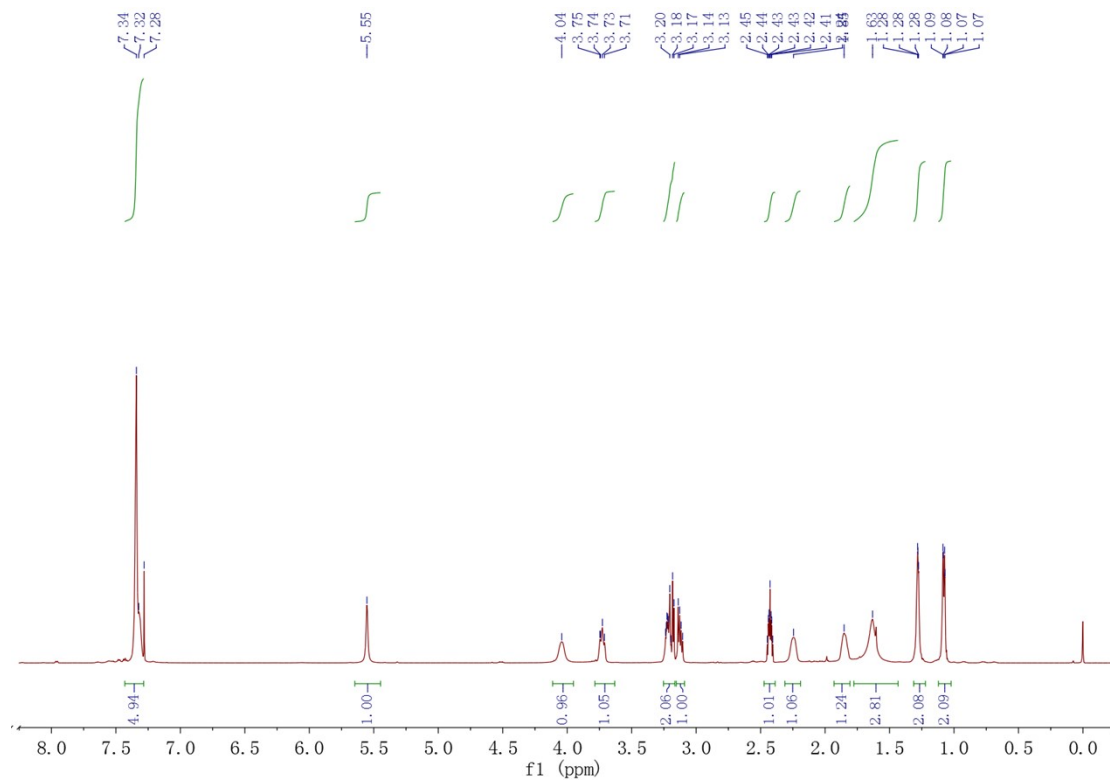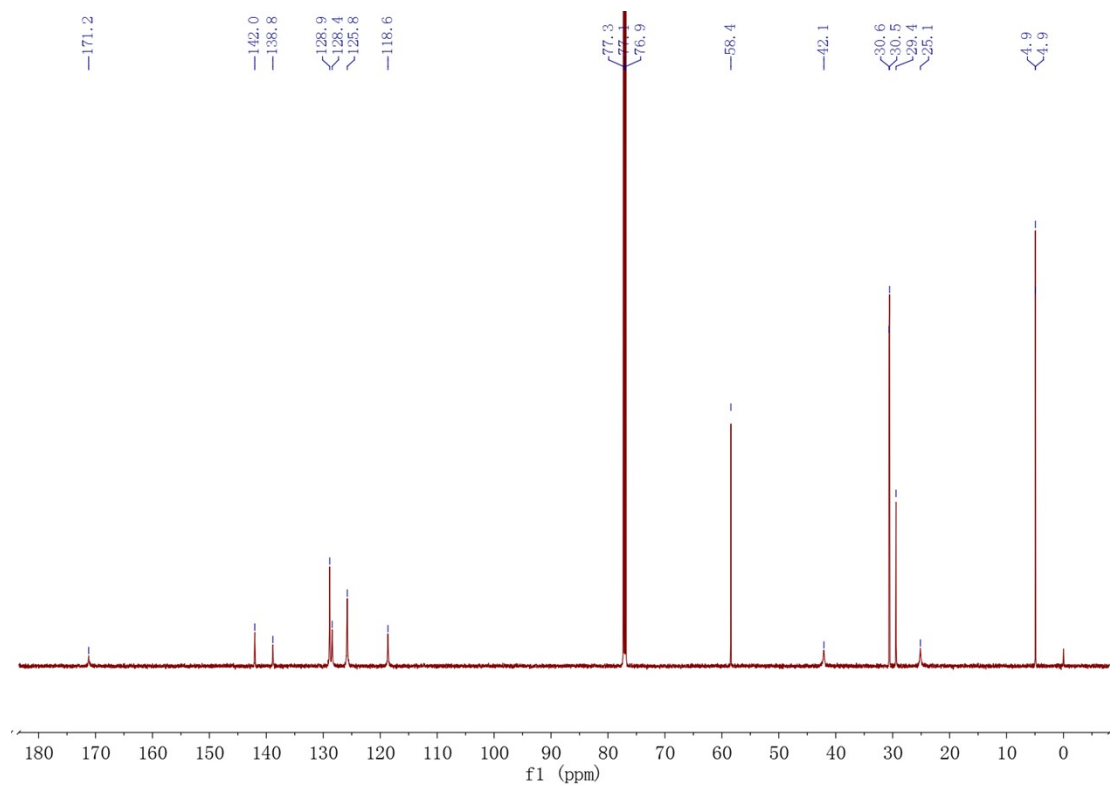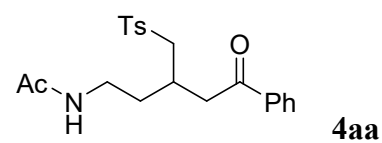

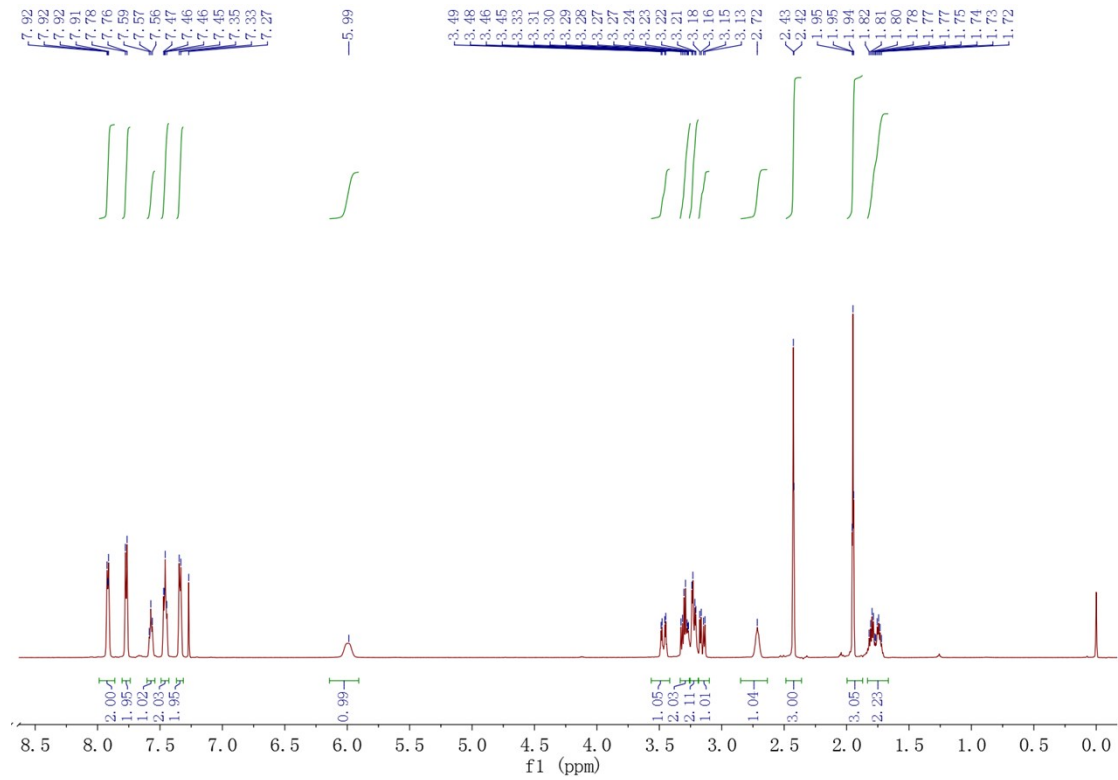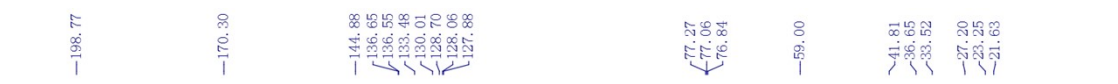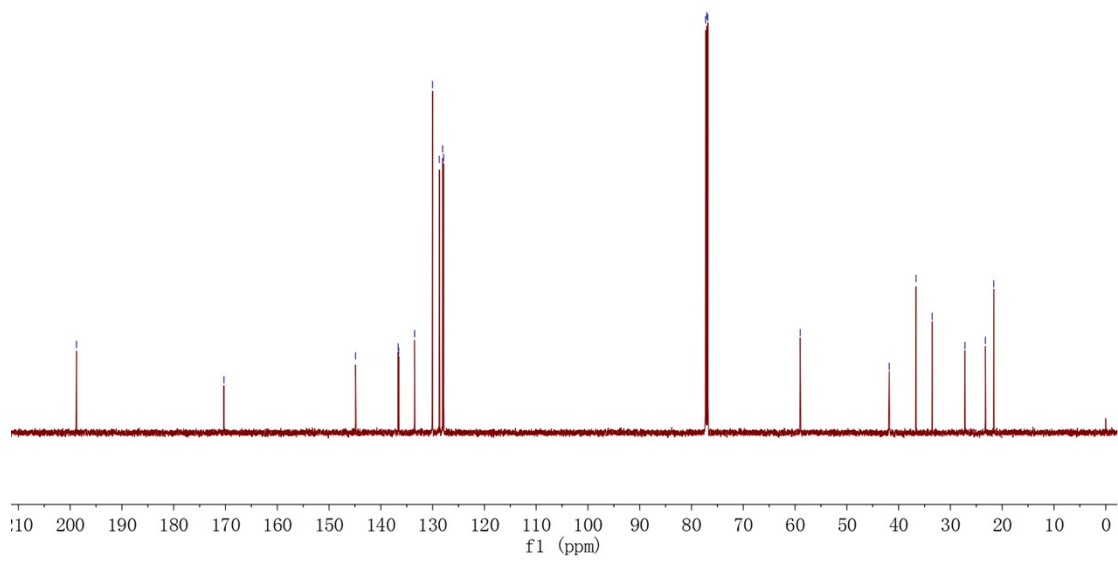

Supplement: d4qo01132e1.pdf [file d4qo01132e1.pdf]
